# Supplementary material for: Mitovirus and Mitochondrial Coding Sequences from Basal Fungus Entomophthora muscae
Source: MDPI journal article supplement (doi:10.3390/v11040351), 2019-04-17
Supplement: s1 [file s1]

## Supplementary Data

### *E. muscae* Mitovirus Sequences

Red shading: upstream stop codon, first in-frame AUG codon, and downstream stop codon  
Orange shading: proposed alternative start codon

Gray shading: UGA(Trp) codons

Yellow shading: GDD-motif codons

N residues (cyan lettering) were inserted into the EnmuMV2-KVL-14-118 sequence to fill two gaps relative to the conserved sequences of other EnmuMV2 strains.

>EnmuMV1-KVL-14-117

GACGTCTCTTTACAGAGACGTCTAACAGGACAAGCGTCCTTTGGTCATGAACCAACCTCG  
CGAATAGATCCCTCATCAGGACCGAAGGTTATACCTTCTATGGTCGGATGTTAGGTTTCG  
ACTTCCAAGCGGGTGAAGACGTCTACACCTAAAATCCTCCTGGCTCTGCGTGATGCAGGC  
AACCAGGTCGGGTAAAGTGACCCGGCGTCTAGAGCTAAAGTAGATGAGTAACTTAAGAGG  
AGTTATATCCTCTTATAGTTCTTATCCAAATAGATAGAATGGGGGCCCCCGATGTCATTG  
TATCCGGTAAATTAATTACCAATTATTTATCGAGATTCCAACAACACAGAACTAAAATGA  
AAAGCAAACAACAATTATTAATCCTTGTCGGATGAGTAATTCGTTGGTACTTTTCTTCGG  
TTCCTGAGTCGCGAAATGCTTATAGATACTGAAAACATCTATGAGCTCGGTACGAAGAGT  
CCCGAGGGTTAGAATGAACGGTTAAACGTTTCAAATAATCCGATTATGCGTAACCAGAT  
ACATATCTGGAAAACCGCATTATCCTACTGATGTAACAATCGGCATGACGAAAGATGGAC  
TTCCAAAGGCTTTAGGGCCTTTAAAGTCTCTCGTTTCGTTCCAGGGACGTGCAAAGTCTAA  
GATTAGTCCTTACCCTACTTTACGTAGGCCGGGCTTTAGACCTAGTACGTTAAATCCTG  
ATTTAAGGAGTATCACTACTCCTTCATCAGCGAATCCTGAACTGATTGAAGATATATATC  
AATTCGCAAAGAACTCGCGAGTTGATCTACATCTTTCATCTATAGATACGGACTTTAGGG  
CTTTTCACTTTACAGAGAAGGCCGGCCCGTCTGGACATGGTCTTTTGGCTAGTTATAATG  
ATTATTATAATCTGACAGAAGACTTGAAACAAGATTTGCTTCTTATTTCAAACCAGACGA  
TTGGAGAGCATTTCAACAATGTTGAGAATACTCATCCAACGTTGCTTGATCACTTTCGGA  
CCAATTGGGTAAAGAAGACCGAAGACGGTCAACTTTCCCCCTTTAGATCAAACTCATAC  
GAGTTATTAGTCTAAAGCCCGATCGTGAGTACAAGACAAGGCCGTTTGCTTTATTAGACT  
ATTGAAGTCAGACTTGTTTAAAACCAATACATGACAAGATATTCGGTATCTTGAAACAGT  
ATGGTAAAACAGACTGTACATTCCGGTCATAATGAAGCAATGAACATAGCGTCTAATATTC  
CTAATCCAGATGGATCTCAATTCCATAGTCTTGATCTCTCAAGCGCTACAGATAGATTTCC  
CAATGGACCTTCAAGTTAAGATTTTATCACTCATGATTGGTGAGGATAAAGCCGAGGCTT  
GAAGGAGAATATTGGTTAGCAAAGAGTATACAGTGCTCTCGACTGGGGCGAGGGTTCGTT  
ACCTCGCCGGACAGCCGATGGGCGCGTATAGCTCTTGAGCTATGTTACCTTATGCCACC  
ACATAGTGGTTAGGTATGCGGCGCGTAATGCGAAGTTTGACCGATACACAATAATTGGCG  
ATGATATAGTTATTAGGAACGACAACGTTGCCGAACGCTACAAGAATATCGTAAACCAGT  
TAGGTGTAACCATTTACAGAGGCAAAATCTCATGTGTACCCGACACATTTGAAATAGCTA

AGAAATGGTACTACCGTGGAAAGGAGATTACCCCTTTTCCGATCGATGGTATGGAGAAGA  
TATGAAAGTCTTACGACCTTTTATTCTTGTTCTACTAGACCTTAAAAGAAATAAAGGTC  
TAGAGCCTCGATTTGGAGTGGAATCTCTAGCGATGATTAGATCTCTCTGATCAAGACTAG  
GGAAACCCCCACGACTAGTACGGTCTGTCTGTAATGGGTACAGACGCTTTGCAGCCTTTC  
CGTTCTTTGGTGAGAAGGACGCTGACTATAAGGATCCACGGGGATTCTTAGAATCAGTTA  
ACTTCCCAAGTGCAGGACTAATGAGTCAAGAGTCAGCAAAGGCTCTTATTACATCAGTTA  
CTGCCGGCCAATTAACGAACCTCCCTTGTTAATCAGTTATTTACGTACCAAATGGACATAA  
ATACTATAACAAAGAGAGCTTACGAGTCTGTTTCCATCTTGGGATACGGACCGTTTGCTG  
AAGGGCTGGAGGACAAGACCATTGATAATCATCCTTTCTTTCATCGCAGAAGGCGATGG  
TTAAAGATAGTCTGAGCATCCTTACGGAGGCCAAGGAGTCTGCTTCTAAGAATAACTTTG  
ATGACATAATAAATATGAAACCTCTGATATTCTTAAGCAACCCAACGGCTAGGTTGAGCG  
GAGACCGAGAGGTTGAAATTCTCGGTTCTCAAGCAGTTCTAGTCCACTCCGCGGTAGCCG  
CCCTTAAAGGGATCATGCTAATCCGTGAACCTCGTTTTAACAAACGAGGAAGATTCACAGA  
CTGAGCAATGAGTTCTTGAAGATATACTGACGATTTTAACATCGTCCGAAAACCTTGAGA  
ACGTGCTGAAGAACTTCATCTTTGATGATGTTCTTCCACGTGCTAAGTTTAAAGCCTTCA  
TGAAGGACTTTAAATCTCGAAGTCGAGTCAAATCACTTTTAGATGATTAGCCTCTCCCTC  
TGAAGGGGGTCTTTCCTCGTCAAATCTTAAGATGATGATAGAGAGGGGCTCTTAACACC  
AAATTAAGGCTCATAACCTTTGGCTAGCAATAGTTTATTTCGCCGGGACAGTTCATGAC  
TGTCGGGGATAATATCCCCTGTTAGACGACCTCGTAAGAGGTCG

>EnmuMV1-KVL-14-118

AGACGTCTAACAGGACAAGCGTCCTTTGGTCATGAACCAACCTCGCGAATAGATCCCTCA  
TCAGGACCGAAGGTTATACCTTCTATGGTCCGATGTTAGGTTTCGACTTCCAAGCGGGTG  
AAGACGTCTACACCTAAAATCCTCCTGGCTCTGCGTGATGCAGGCAACCAGGTCGGGTAA  
AGTGACCCGGCGTCTAGAGCTAAAGTAGATGAGTAACCTAAGAGGAGTTATATCCTCTTA  
TAGTTCTTATCCAAATAGATAGAATGGGGGCCCCGATGTCATTGTATCCGGTAAATTAAT  
TACCAATTATTTATCGAGATTCCAACAACACAGAACTAAAATGAAAAGCAAACAACAT  
TATTAATCCTTGTCGGATGAGTAATTCGTTGGTACTTTTCTTCGGTTCCTGAGTCGCGAA  
ATGCTTATAGATACTGAAAACATCTATGAGCTCGGTACGAAGAGTCCCGAGGGTTAGAAT  
GAACGGTTAAACGTTTCAAACCTAATCCGATTATGCGTAACCAGATACATATCTGGAAAAC  
CGCATTATCCTACTGATGTAACAATCGGCATGACGAAAGATGGACTTCCAAGGCTTTAG  
GGCCTTTAAAGTCTCTCGTTCCAGGGACGTACAAAGTCTAAGATTAGTCCTTACCC  
TACTTTACGTAGGCCGGGCTTTAGACCTAGTACGTTAAATCCTGATTTAAGGAGTATCA  
CTACTCCTTCATCAGCGAATCCTGAACTGATTGAAGATATATATCAATTCGCAAAGAACT  
CGCGAGTTGATCTACATCTTTCATCTATAGATACGGACTTTAGGGCTTTTCACTTTACAG  
AGAAGGCCGGCCCGTCTGGACATGGTCTTTTGGCTAGTTATAATGATTATTATAACCTGA  
CAGAAGACTTGAAACAAGATTTGCTTCTTATTTCAAACCAGACGATTGGAGAGCATTTCA  
ACAATGTTGAGAATACTCATCCAACGTTGCTTGATCACTTTTCGGACCAATTGGGTTAAGA  
AGACCGAAGACGGTCAACTTTCCCCCTTTAGATCAAACTCATACGAGTTATTAGTCTAA  
AGCCCGATCGTGAGTACAAGACAAGGCCGTTTGCTTTATTAGACTATTGAAGTCAGACTT  
GTTTAAACCAATACATGACAAGATATTCGGTATCTTGAAACAGTATGGTAAACAGACT  
GTACATTCCGTGATAATGAAGCAATGAACATAGCGTCTAATATTCCTAATCCAGATGGAT  
CTCAATTCCATAGTCTTGATCTCTCAAGCGCTACAGATAGATTTCCAATGGACCTTCAAG  
TTAAGATTTTATCACTCATGATTGGTGAGGATAAAGCCGAGGCTTGAAGGAGAATATTGG  
TTAGCAAAGAGTATACAGTGCTCTCGACTGGGGCGAGGGTTCGTTACCTCGCCGGACAGC

CGATGGGCGCGTATAGCTCTTGAGCTATGTTACCTTATGCCACCACATAGTGGTTAGGT  
ATGCGGCGCGTAATGCCAAGTTTGACCGATACACAATAATTGGCGATGATATAGTTATTA  
GGAACGACAACGTTGCCGAACGCTACAAGAATATCGTAAACCAGTTAGGTGTAACCATTT  
CAGAGGCAAAGTCTCATGTGTACCCGACACATTTGAAATAGCTAAGAAATGGTACTACC  
GTGGAAGGAGATTACCCCTTTTCCGATCGATGGTATGGAGAAGATATGAAAGTCTTACG  
ACCTTTTATTCTTGTTCTACTAGACCTTAAAAGAAATAAAGGTCTAGAGCCTCGATTTG  
GAGTGGAATCTCTAGCGATGATTAGATCTCTCTGATCAAGACTAGGGAAACCCCCACGAC  
TAGTACGGTCTGTCTGTAATGGGTACAGACGCTTTCAGCCTTTCGGTTCTTTGGTGAGA  
AGGACGCTGACTATAAGGATCCACGGGGATTCTTAGAATCAGTTAACTTCCCAAGTGCAG  
GACTAATGAGTCAAGAGTCAGCAAAGGCTCTTATTACATCAGTTACTGCCGGCCAATTAA  
CGAACTCCCTTGTTAATCAGTTATTTACGTACCAAATGGACATAAATACTATAACAAAGA  
GAGCTTACGAGTCTGTTTCCATCTTGGGATACGGACCGTTTGCTGAAGGGCTGGAGGACA  
AGACCATTGATAATCATCCTTTCTTTGCATCGCAGAAGGCGATGGTTAAAGATAGTCTAA  
GCATCCTTACGGAGGCCAAGGAGTCTGCTTCTAAGAATAACTTTGATGACATAATAAATA  
TGAAACCTCTGATATTCTTAAGCAACCCAACGGCTAGGTTGAGCGGAGACCGAGAGGTTG  
AAATTCTCGGTTCTCAAGCAGTTCTAGTCCACTCCGCGGTAGCCGCCCTTAAAGGGATCA  
TGCTAATCCGTGAACCTGTTTTAACAAACGAGGAAGATTACAGACTGAGCAATGAGTTC  
TTCGAAGATATACTGACGATTTTAACATCGTCCGAAAACCTTGAGAACGTGCTGAAGAATT  
TCATCTTTGATGATGTTCTTCCACGTGCCAAGTTTAAAGCCTTCATGAAGGACTTTAAAT  
CTCGAAGTCGAGTCAAATCACTTTTAGATGATTAGTCTCTCCCTCTGAAGGGGGTCTTTC  
CTCGTCAAAATCTTAAGATGATGATAGAGAGGGGCTCTCAACACCAAATTAAGGGCTCA  
TAACCTTTGGCTAGCAATAGTTTATTCGCCGGGACAGTTCATGACTGTCGGGGATAATAT  
CCCCTGTTAGACGACCTCGTAAGAGG

>EnmuMV1-HHdFL130914-1

CGTCTCTTTACAGAGACGTCTAACAGGACAAGCGTCCTTTGGTCATGAACCAACCTCGCG  
AATAGATCCCTCATCAGGACCGAAGGTTATACCTTCTATGGTCGGATGTTAGGTTTCGAC  
TTCCAAGCGGGTGAAGACGTCTACACCTAAATCCTCCTGGCTCTGCGTGATGCAGGCAA  
CCAGGTCGGGTAAAGTGACCCGGCGTCTAGAGCTAAAGTAGATGAGTAACTTAAGAGGAG  
TTATATCCTCTTATAGTTCTTATCCAAATAGATAGAATGGGGGCCCCGATGTCATTGTA  
TCCGGTAAATTAATTACCAATTATTTATCGAGATTCCAACAACACAGAACTAAATGAAA  
AGCAAACAACAATTATTAATCCTTGTCCGATGAGTAATTGTTGGTACTTTTCTTCGGTT  
CCTGAGTCGCGAAATGCTTATAGATACTGAAAACATCTATGAGCTCGGTACGAAGAGTCC  
CGAGGGTTAGAATGAACGGTTAAACGTTTCAAATAATCCGATTATGCGTAACCAGATAC  
ATATCTGGAACCCGATTATCCTACTGATGTAACAATCGGCATGACGAAAGATGGACTT  
CCAAAGGCTTTAGGGCCTTTAAAGTCTCTCGTTCGTTCCAGGGACGTACAAAGTCTAAGA  
TTAGTCCTTACCCTACTTTACGTAGGCCGGGCTTTAGACCTAGTACGTAAATCCTGAT  
TTAAGAAGTATCACTACTCCTTCATCAGCGAATCCTGAACTGATTGAAGATATATATCAA  
TTCGCAAAGAACTCGCGAGTTGATCTACATCTTTCATCTATAGATACGGACTTTAGGGCT  
TTTCACTTTACAGAGAAGGCCGGCCGCTCTGGACATGGTCTTTTGGCTAGTTATAATGAT  
TATTATAATCTGACAGAAGACTTGAAACAAGATTTGCTTCTTATTTCAAACCAGACGATT  
GGAGAGCATTTCAACAATGTTGAGAATACTCATCAACGTTGCTTGATCACTTTCGGACC  
AATTGGGTTAAGAAGACCGAAGACGGTCAACTTTCCCCCTTTAGATCAAACTCATACGA  
GTTATTAGTCTAAAGCCCGATCGTGAGTACAAGACAAGGCCGTTTGCTTTATTAGACTAT  
TGAAGTCAGACTTGTTTAAACCAATACATGACAAGATATTCGGTATCTTGAAACAGTAT

GGTAAAACAGACTGTACATTCGGTCATAATGAAGCAATGAACATAGCGTCTAATATTCCT  
AATCCAGATGGATCTCAATTCCATAGTCTTGATCTCTCAAGCGCTACAGATAGATTTCCA  
ATGGACCTTCAAGTTAAGATTTTATCACTCATGATTGGTGAGGATAAAGCCGAGGCTTGA  
AGGAGAATATTGGTTAGCAAAGAGTATACAGTGCTCTCGACTGGGGCGAGGGTTCGTTAC  
CTCGCCGGACAGCCGATGGGCGCGTATAGCTCTTGAGCTATGTTACCTTATGCCACCAC  
ATAGTGTTAGGTATGCGGCGCGTAATGCGAAGTTTGACCGATACACAATAATTGGCGAT  
GATATAGTTATTAGGAACGACAACGTTGCCGAACGCTACAAGAATATCGTAAACCAGTTA  
GGTGTAAACCATTTAGAGGCGAAATCTCATGTGTACCCGACACATTTGAAATAGCTAAG  
AAATGGTACTACCGTGGAAGGAGATTACCCCTTTTCCGATCGATGGTATGGAGAAGATA  
TGAAAGTCTTACGACCTTTTATTCTTGTTCTACTAGACCTTAAAAGAAATAAAGGTCTA  
GAGCCTCGATTTGGAGTGGAATCTCTAGCGATGATTAGATCTCTCTGATCAAGACTAGGG  
AAACCCCCACGACTAGTACGGTCTGTCTGTAATGGGTACAGACGCTTTGCAGCCTTTCCG  
TTCTTTGGTGAGAAGGACGCTGACTATAAGGATCCACGGGGATTCTTAGAATCAGTTAAC  
TTCCCAAGTGCAGGACTAATGAGTCAAGAGTCAGCAAAGGCTCTTATTACATCAGTTACT  
GCCGGCCAATTAACGAACTCCCTTGTTAATCAGTTATTTACGTACCAAATGGACATAAAT  
ACTATAACAAAGAGAGCTTACGAGTCTGTTTCCATCTTGGGATACGGACCGTTTGCTGAA  
GGGCTGGAGGACAAGACCATTGATAATCATCCTTTCTTTGCATCGCAGAAGGCGATGGTT  
AAAGATAGTCTGAGCATCCTTACGGAGGCCAAGGAGTCTGCTTCTAAGAATAACTTTGAT  
GACATAATAAATATGAAACCTTTGATATTCTTAAGCAACCCAACGGCTAGGTTGAGCGGA  
GACCGAGAGGTTGAAATTCTCGGTTCTCAAGCAGTTCTAGTCCACTCCGCGGTAGCCGCC  
CTTAAAGGGATCATGCTAATCCGTGAACTCGTTTTAACAAACGAGGAAGATTCACAGACT  
GAGCAATGAGTTCTTTCGAAGATATACTGACGACTTTAACATCGTCCGAAAACCTTGAGAAC  
GTGTTGAAGAATTTTCATCTTTGATGATGTTCTTCCACGTGCTAAGTTTAAAGCCTTCATG  
AAGGACTTTAAATCTCGAAGTCGAGTCAAATCACTTTTAGATGATTAGTCTCTCCCTCTG  
AAGGGGGTCTTTCCTCGTCAAAATCTTAAGATGATGATAGAGAGGGGCTCTTAACACCAA  
ATTAAAAGGCTCATAACCTTTGGCTAGCAATAGTTTATTCGCCGGGACAGTTCATGACTG  
TCGGGGATAATATCCCCTGTTAGACGACCTCGTAAGAGGTCTG

>EnmuMV1-Berkeley

GACGTCTCTTTACAGAGACGTCTAACAGGACAAGCGTCCTTTGGTCATGAACCAACCTCG  
CGAATAGATCCCTCATCAGGACCGAAGGTTATACCTTCTATGGTCCGATGTTAGGTTTCG  
ACTTCCAAGCGGGTGAAGACGTCTACACCTAAAATCCTCCTGGCTCTGCGTGATGCAGGC  
AACCAGGTCGGGTAAAGTGACCCGTCGTCTAGAGCTAAAGTAGATTAGTAACTCTAAGAG  
GAGTAACATCCTCTTACTGTTCTAATCCAAATAGATAGAATGGGGGCCCCGATGTCATT  
GTATCCGGTATATAATAACCTATTATATACCGTGATTCCAACAACACAGAACTAAAATG  
AAAAGCAAACAACAATTATTAATCCTTATCGGATGAGTAATTCGTTGGTACTTTTCTTCG  
GTTCTGAGTCGCGAAATGCTTATAGATACTGAAAACATCTATGAGCTCGGTACGAAGAG  
TCCCGAGGGTTAGAATGAACGGTTAAACGTTTCAAACCTAATCCGATTATGCGTGACCAGA  
TACATATCTGGAACCCGATTATCCTACTGATGTAACAATCCGCATGACGAAAGATGGA  
CTTCAAAGGCTTTAGGGCCTTTAAAGTCTCTCGTTTCGTTCCAGGGACATACAGAGTCTA  
AGATTAGTCCTTACCCTACTTTACGTAGGCCGGGCTTTAGACCGAGTACGTTAAATCCT  
GATTTAAAGAGTATCACTACTCCTTCATCAGCGAATCCTGAACTGATTGAAGATATATAT  
CAATTGCAAAAGAACTCGCGAGTTGATCTACATCTTTTCATCTATAGATACGGACTTTAGG  
GCTTTTCACTTTACAGAGAAGGCCGGCCCGTCTGGACATGGTCTCCTAGCATGTTATAAT  
GATTATTATAACTTGACAGAGGACTTGAAACAAGATTTGCTTCTTATTTCAAACCAGACG

ATTGGAGAGCATTTCAACAATGTTGAGAATACTCATCCAACGTTGCTTGATCACTTTTCGG  
ACCAATTGGGTAAAGAAGACCGAAGACGGTCAACTTTCCCCCTTTAGATCTAAACTCTTA  
CGAGTTATAAGTCTAAAGCCCGATCGTGAGTACAAGACTAGGCCGTTTGCTTTATTAGAC  
TATTGAAGTCAGACTTGTTTTAAACCAATACATGACAAGATATTCGGTATCTTGAAACAG  
TATGGTAAACAGACTGTACATTCGGTCATAATGAAGCAATGAACATAGCGTCTAATATT  
CCTAATCCTGATGGATCTCAATTCCATAGTCTTGATCTCTCAAGCGCTACAGATAGATTT  
CCAATGGACCTTCAAGTTAAGATTTTATCACTCATGATTGGTGAGGATAAAGCCGAGGCT  
TGAAGGAGAATATTGGTTAGCAAAGAGTATACAGTACTCTCGACTGGGGCGAAGGTTTCGT  
TACCTCGCCGGACAGCCGATGGGCGCGTATAGCTCTTGAGCTATGTTACCTTATGCCAC  
CACATAGTGGTTAGGTATGCGGCGCGTAATGCGAAGTATGACCGATACACAATAATTGGC  
GATGATATAGTTATTAGGAACGACGACGTTGCCGAACGCTACAAGAATATCGTAAACCAA  
TTAGGTGTAACCATTTTCAGAGGCCAAAGTCTCATGTGTCACCCGACACATTTGAAATCGCT  
AAGAAATGGTACTACCGTGGAAGGAGATTACCCCTTTTCCAATCGATGGTATGGAGAAG  
ATATGAAAGTCTTACGACCTTTTATTCTTATTCTACTAGACCTTAAAAGAAACAAAGGT  
CTAGAGCCACGTTTTGGAGTGGAATCTCTAGCGATGATTAGATCTCTCTGATCAAGACTA  
GGGAAACCCCCACGACTAGTACGGTCTGTCTGTAATGGGTACAGACGCTTTGCAGCCTTT  
CCGTTCTTTGGAGAGAAGGACGCTGACTATAAGGATCCTAGGGGATTCTTAGAATCAGTT  
AACTTCCCAAGTGCAGGACTAATGAGTCAAGAGTCAGCAAAGGCTCTTATTACATCAGTT  
ACTGCCGGCCAATTAACGAACTCCCTTGTTAATCAGTTGTTTACGTACCAAATGGACATA  
AACACTATAACAAAGAGAGCTTACGAGTCTGTTTCCATCTTGGGATACGGACCGTTTGCT  
GAAGGGCTGGAGGACAAGACCATTGATAATCATCCATTCTTGCATCGCAGAAGGCGATG  
GTTAAAGATAGTCTGAACATCCTTACGGAGGCCAAGGAGTCTGCTTCCAAGAATAACTTT  
GATGACATAATAAATATGAAACCACTGATATTCTTAAGCAACCCAACGGCTAGGTTGAGT  
GGAGACCGAGAGGTTGAAATCCTCGGTTCTCAAGCAGTCCTAGTTCACTCCGCGGTAGCC  
GCCCTTAAAGGGATCATGCTAATCCGTGAACTCGTTTTAACAAACGAGGAAGATTCACAG  
ACTGAGCAATGAGTTCTTCGAAGATATACTGACGATTTTAAACATCGTCCGAAAACCTTGAG  
AACGTGCTGAAGAATTTTATCTTTGATGAAGTTCTTCCACGTGCCAAGTTTAAAGCCTTC  
ATGAAGGACTTTAAATCGCGAAGTCGAGTTAAATCACTTTTAGATGATTAGTCTCTCCCT  
ATGAAGGGGGTCTTTCCTCGTCAAAATCTTAAGATGATGATGAGAGAGGGGCTCTCAATA  
CCAAATTAAGGCTCATAACCTTTGGCTAGCAATAGTTTATTGCGCCGGGACAGTTCATG  
ACTGTGCGGGATAGTATCCCCTGTTAGACGACCTCGTGAGAGGTTCG

>EnmuMV2-KVL-14-117

CCCGCGTCGAAACGCAGGGCAAGACTCACCTCTGAGTTATTTCTAGAAATGGCCAATCCT  
AGGTGGATGACGCACCTTTTCCTTAAGGAAAAGCGATAGCACACCTTCGTGTTACTTTTCG  
TAGTTTTAGTTAATTAGATACTACCACCAGCTCACGATGGTGCCCTGAAACAATGGGGCG  
TTACATCATGACGCGTAGGCGGGATAGGGCTAGTCCCCCGAGTCTCGACAGGATGTGCAA  
ACGCTGGAACTAGGAACACGAGAAGCCTCCAAAAATACAAAAACATATCACTACAAATAA  
TATAATGATGAACAAAATTTTCGCCATTTATAAATGGGTAATCAAAATGATCATCAAAAA  
TCAAAAGTATGTAATATATATTGATTTTTTGAAAAGAGCAAACAAACAAGTGATTAAACAC  
GCGAGGATCTTTTAAACACAGTCAAAGGATTAAATCCATGAGACTACATGTTACAAGATT  
CTGGTGCGGACAACCACTTATGGAATCTGGTGACCCATCTATCGGTCTAGATTCAAGGGG  
ATTACCCAAGAATTTAGGTATACTTAGAGAGTTAATCCTAAGTAATGATATTTGGGACAG  
AAGGGTAGCTCATACTTTATTGTTAATAAGTAGAGCCATTCTTGCAATGGTGAGATCTC

GGTAACGAGTATCACTGACAAGGGGCCGGATGTCAACCCGGACCTCTTGAAAGAGTATAG  
TTCTGTTTTAAAAGAACTAAACTGAACCATTCCAGTTCCAACCTGGTCTGAATGCCATTT  
GTCTACAAAGTCAGGCCAACTCCCAGGCGATGATTGGATCAATTGCTGATCTTAATCA  
TCTACCCCAAAGCTTGAGAGACGATATATCAGTTCTCGGAGGTCCAGAACTAACCAAAGT  
TATGGATTTACTCTTTGAAAAGATAAATGTCAGAGCCTGAAACAGACACTTCAAGGTCAA  
AGACAAGTCTTTGATCAGGAAGCTATCTGTTGTTTCTGACCCAGAGGGAAAAGAGCGAGT  
AATCGCTATTTTCGATTATTGGTCACAACTGCACTTAAACCCCTTCATGATAACTTGTT  
TGAGTTATTATCTAGGATAAAAGGAGATTGTACCTTTAATCACTCCGCTGGGAGAAACCT  
TTCGGACAAGGCCAAGGTCCGTACTATTCTATGGACTTAACTGCTGCTACAGACCGATT  
CCCAATTTGGGTACAACGGCATGTAATCAGTGAGTTAATCTCCGTAGAATACGCAGACTC  
CTGATCTCGGGTCATGACCTCTCACGAGTTTTCTGCTCCATTTGCTGACTCGCCCATAAA  
CTATGGGGTAGGCCAGCCGATGGGTGCATACTCGTCGTGATCGGCATTTTCCCTATGCCA  
TCATCTGACTGTTAGAATTGCTGCGAAAAGGGCTGGATTATCCAGCTCCTGGTCTAAGTA  
TATTCTATTAAGAGATGATATAGTTCTAACTAATCCAAAAGTTGCTGATGAATATCAGAA  
ACTGATGGCTACGTTAGGAGTATCACTCTCTCCTACAAAGACACATGTATCAAAAGATAC  
ATATGAATTTGCGAAAAGATGATACCACGAAGGTAATGAGATCACCGGAATTCACCTTGG  
ACCGTTTTTGGCGGCCAAGAATTGGGGCGGATTTGCATCTGCCCTACATGAATTCACAAG  
GTGAGGCATCAAACCTCATGAGGTGGAACCCGGGTCGATAGCTGCTGGACTTAGAGCTCT  
TGGTTTTGAAAGACTAAGAGATACTCATAAGATCCAACTTTTCTACACATCCCCACAAA  
GGGGGACTCACCAGAAGATCGAAGTGAGAAGTCAATATGACTAATCAACAAGTTCTTCAA  
AAGTGAGGTGCGCTGCAACAGACAGGTGACGTTTAAAGAGAAAATTTGTTCTCCAAACGCT  
CGCTGAAGTTAAACAGCCTGTATAGAACTGCTATCAAGCTTATAGCAAAGGAACTCTC  
TGCTTGGCAACAGAGTCTTCCCGAGCTAGCAAGCTTAGGATTGGTTGACCAAACGTACT  
ATTAGCTATGCCACCCGTAGCCGTCTGCCGAAAGCAGCTTTAGAGCTGCAATCTGGGTT  
TGACAAGCTTCGGAGTGCTTACTGGGATCTCGATGAAGACATAGTCTTCGGAGAGATACC  
GATAAGAGGAGTTAATCCCTCTCGGGTTAATTCCGTACGAGCTAAAGAAGTTTACTAGC  
AACCAAAGTTCTGATCACTAATAGATACTCTCGTTGATCACGAGATTACCGGTCATCTCG  
AGACCACCTACTCTCTGACAAAGAGTACAGTGGCCGTCTAAATGACAACTTCCAACGGG  
GGAATCAAATTCTAGCCAAGAATTTGGAGAAATAGTTTTCTCACGAACTATTCCGGGATCC  
CCGTTGAGTATTGCCCTTTCT

>EnmuMV2-KVL-14-118

CGCAGGGCAATACTCACCTCTGAGTTATTTCTAGAAATGGCCAATCCTAGGTGGATGACG  
CACCTTTTCCATAAGGAAAAGCGATAGCACACCTTCGTGTTACTTTCTAGTTTTAGTTA  
ATTAGATACTACCACCAGCTCACGATGGTGCCCTGAAACAATGGGGCGTTACATCATGAC  
GCGTAGGCGGGTAGGGCTAGTCCCCCGAGTCTCGACAGGATGTGAAACGCTGGAAC  
GGAACACGAGAAGCCTCCAAAAATACAAAAACATATCACTACAAATAATATAATGATGAA  
CAAAATTTTCGCCATTTATAAATGGGTAATCAAATGATCATCAAAATCAAAAGTATGT  
AATATATATTGATTTTTGAAAAGAGCAAACAACAAGTGATTAAACACGCGAGGATCTTT  
TAACACAGTCAAAGGATTAATCCATGAGACTACATGTTACAAGATTCTGGTGCGGACA  
ACCACTTATGGAATCTGGTGACCCATCTATCGGTCTAGATTCAAGGGGATTACCCAAGAA  
TTTAGGTATACTTAGAGAGTTAATCCTAAGTAATGATATTTGGGACAGAAGGGTAGC  
NNNNNNNNNNNNNNNNNNNNNNNNNNNNNNNNNNNNNNNNNNNNNNNNNNNNNNNNNNNN  
GCCATTCCCTTGCAATGGTGAGATCTCGGTAACGAGTAT  
CACTGACAAGGGGCCGGATGTCAACCCGGACCTCTTGAAAGAGTATAGTTCTGTTTTAAA  
AGAACTAACTGAACCATTCCAGTTCCAACCTGGTCTGAATGCCATTTGTCTACAAAGTC

AGGCCCAAACCTCCAGGCGATGATTGGATCAATTGCTGATCTTAATCATCTACCCCAAAG  
CTTGAGAGACGATATATCAGTTCTCGGAGGTCCAGAACTAACCAAAGTTATGGATTTACT  
CTTTGAAAAGATAAATGTCAAAGCCTGAAACAGACACTTCAAGGTCAAAGACAAGTCTTT  
GATCAGGAAGCTGTCTGTTGTTTCTGACCCAGAGGGAAAAGAGCGAGTAATCGCTATTTT  
CGATTATTGGTCACAACTGCACTTAAACCCCTTCATGATAACTTGTTTGAGTTATTATC  
TAGGATAAAAAGGAGATTGTACCTTTAATCACTCCGCTGGGAGAAACCTTTCGGACAAGGC  
CAAGGGTCCGTACTATTCTATGGACTTAACTGCTGCTACAGACCGATTCCCAATTTGGGT  
ACAACGGCATGTAATCAGTGAGTTAATCTCCGTAGAATACGCAGACTCCTGATCTCGGGT  
CATGACCTCTCACGAGTTTTCTGCTCCATTTGCTGACTCGCCATAAATTATGGGGTAGG  
CCAGCCGATGGGTGCATACTCGTCGTGATCGGCATTTTCCCTATGCCATCATCTGACTGT  
TAGAATTGCTGCGAAAAGGGCTGGATTATCCAGCTCCTGGTCTAAGTATATTCTATTAGG  
AGATGATATAGTTCTAACTAATCCAAAAGTTGCTGATGAATATCAGAACTGATGGCTAC  
GTTAGGAGTATCACTCTCTCCTACAAAGACACATGTATCAAAAGACACATATGAATTTGC  
GAAAAGATGATACCACGAAGGTAATGAGATCACCGGAATTCAACTTGACCGTTTTTGGC  
GGCCAAGAATTGGGGCGGATTTGCATCTGCCCTACATGAATTCACAAGGTGAGGCATCAA  
ACCTCATGAGGTGGAACCCGGTTCGATAGCTGCTGGACTTAGAGCTCTTGGTTTTGAAAG  
ACTAAGAGATACTCATAAGATCCAACTTTTCTACACATCCCCACAAAGGGGGACTCACC  
AGAAGATCGAAGTGAGAAGTCAATATGACTAATCAACAAGTTCTTCAAAGTGAGGTCCG  
CTGCAACAGACAGGTGACGTTTAAAGAGAAATTTGTTCTCCAAACGCTCGCTGAAGTTAA  
AACAGCCTGTATAGAACTGCTATCAAGCTTATAGCAAAGGAACTCTCTGCTTGGCAACA  
GAGTCTTCCCGAGCTAGCAAGCTTAGGATTGGTTGACCAAACGTACTATTAGCTATGCC  
ACCCGTAGCCGTCTGCCGGAAGCAGCTTTAGAGCTGCAATCTGGGTTTTGACAAGCTTCG  
GAGTGCTTACTGGGATCTCGATGAAGACATAGTCTTCGGAGAGATACCAATAAGAGGAGT  
TAATCCCTCTCGGGTTAATTCCGTGCGAGCTAAAGAAGTTTTACTAGCAACCAAAGTTCT  
GATCACTAATAGATACTCTCGCTGATCACGAGATTACCGGTCATCTCGAGACCACCTACT  
CTCTGACAAAGAGTACAGTGGCCGTCTAAATGACAACTTCCAACGGGGGAATCAAATTC  
TAGCCAAGAATTTGGAGAAATAGTTTTCTCACGAACTATTCCGGGATCCCCGTTGAGTATT  
GCCCTTTC

>EnmuMV2-HHdFL130914-1

CCCGCGTCGAAACGCAGGGCAATACTCACCTCTGAGTTATTTCTAGAAATGGCCAATCCT  
AGGTGGATGACGCACCTTTTCTTAAGGAAAAGCGATAGCACACCTTCGTGTTACTTTTCG  
TAGTTTTAGTTAATTAGATACTACCACCAGCTCACGATGGTGGCCTGGAACAATGGGGCG  
TTACATCATGACGCGTAGGCGGGATAGGGCTAGTCCCCGAGTCTCGACAGGATGTGAA  
ACGCTGGAACTAGGAACACGAGAAGCCTCCAAAAATACAAAAACATATCACTACAAATAA  
TATAATGATGAACAAAATTTTCGCCATTTATAAATGGGTAATCAAATGATCATCAAAAA  
TCAAAGTATGTAATATATATTGATTTTTGAAAAGAGCAAACAACAAGTGATTAAACAC  
GCGAGGATCTTTTAAACACAGTCAAAGGATTAAATCCATGAGACTACATGTTACAAGATT  
CTGGTGCGGACAACCACTTATGGAATCTGGTGACCCATCTATCGGTCTAGATTCAAGGGG  
ATTACCCAAGAATTTAGGTATACTTAGAGAGTTAATCCTAAGTAATGATATTTGGGACAG  
AAGGGTAGCTCATACTTTATTGTTAATAAGTAGAGCCATTCTTGCAATGGTGAGATCTC  
GGTAACGAGTATCACTGACAAGGGGCCGGATGTCAACCCGGACCTCTTGAAAGAGTATAG  
TTCTGTTTTTAAAGAACTAACTGAACCATTCCAGTTCCAACCTGGTCTGAATGCCATTT  
GTCTACAAAGTCAGGCCCAAACCTCCAGGCGATGATTGGATCAATTGCTGATCTTAATCA  
TCTACCCCAAAGCTTGAGAGACGATATATCAGTTCTCGGAGGTCCAGAACTAACCAAAGT

TATGGATTTACTCTTTGAAAAGATAAATGTCAAAGCCTGAAACAGACACTTCAAGGTCAA  
AGACAAGTCTTTGATCAGGAAGCTATCTGTTGTTTCTGACCCAGAGGGAAAAGAGCGAGT  
AATCGCTATTTTCGATTATTGGTCACAACTGCACTTAAACCCCTTCATGATAACTTGTT  
TGAGTTATTATCTAGGATAAAAGGAGATTGTACCTTTAATCACTCCGCTGGGAGAAACCT  
TTCGACAAGGCCAAGGTCCGTACTATTCTATGGACTTAACTGCTGCTACAGACCGATT  
CCCAATTTGGGTACAACGGCATGTAATCAGTGAGTTAATCTCCGTAGAATACGCAGACTC  
CTGATCTCGGGTCATGACCTCTCACGAGTTTTCTGCTCCATTTGCTGACTCGCCCATAAA  
CTATGGGGTAGGCCAGCCGATGGGTGCATACTCGTCGTGATCGGCATTTTCCCTATGCCA  
TCATCTGACTGTTAGAATTGCTGCGAAAAGGGCTGGATTATCCAGCTCCTGGTCTAAGTA  
TATTCTATTA**GGAGATGAT**ATAGTTCTAACTAATCCAAAAGTTGCTGATGAATATCAGAA  
ACTGATGGCTACGTTAGGAGTATCACTCTCTCCTACAAAGACACATGTATCAAAAGATAC  
ATATGAATTTGCGAAAAGATGATACCACGAAGGTAATGAGATCACCGGAATTCACCTTGG  
ACCGTTTTTTGGCGGCCAAGAATTGGGGCGGATTTGCATCTGCCCTACATGAATTCACAAG  
GTGAGGCATCAAACCTCATGAGGTGGAACCCGGTCGATAGCTGCTGGACTTAGAGCTCT  
TGGTTTTGAAAGACTAAGAGATACTCATAAGATCCAACTTTTTCTACACATCCCCACAAA  
GGGGGACTCACCAGAAGATCGAAGTGAGAAGTCAATATGACTAATCAACAAGTTCTTCAA  
AAGTGAGGTCGGCTGCAACAGACAGGTGACGTTTAAAGAGAAAATTTGTTCTCCAAACGCT  
CGCTGAAGTTAAACAGCCTGTATAGAACTGCTATCAAGCTTATAGCAAAGGAACTCTC  
TGCTTGGAACAGAGTCTTCCCGAGCTAGCAAGCTTAGGATTGGTTGACCAAACGTACT  
ATTAGCTATGCCACCCGTAGCCGTCTGCCGAAAGCAGCTTTAGAGCTGCAATCTGGGTT  
TGACAAGCTTCGGAGTGCTTACTGGGATCTCGATGAAGACATAGTCTTCGGAGAGATACC  
AATAAGAGGAGTTAATCCCTCTCGGGTTAATTCGGTACGAGCTAAAGAAGTTTTACTAGC  
AACCAAAGTTCTGATCACTAATAGATACTCTCGCTGATCACGAGATTACCGGTCATCTCG  
AGACCACCTACTCTCTGACAAAGAGTACAGTGCCGTCTAAATGACAACTTCCAACGGG  
GGAATCAAATTCTAGCCAAGAATTTGGAGAA**TAG**TTTTCTCACGAACTATTCCGGGATCC  
CCGTTGAGTATTGCCCTTTCTTCC

>EnmuMV2-Berkeley

CCCGCGTCGAAACGCAGGGCAATACTCACCTCTGAGTTATTTCCCTAGAATAGCCAATCCT  
AGGTGGATGACGCACCTTTTTCCGTAAGGAAAAGCGATAGCACACCTTCGTGTTACTTTCCG  
TAGTTTTAGTTAAT**TAG**ATACTACCACCAGCTCACGATGGTGCCCTGGAACAATGGGGCG  
TTACATCATGACGCGTAGGCGGGATAGGGCTAGTCCCCCGAGTCTCGACAGGATATCGAA  
ACGCTGGAAGTAGGAACACGAGAAGCCTCCAAAATACAAAACATATCACTACAAATAATA  
TA**ATGAT**GAACAAAATTTTCGCCATTTATAAATGGGTAATCAAAATGATCATCAAGAATC  
AAAAGTATGTAATATATATTGATTTTTGAAAAGAGCAAACAAACAAGTGATTAAACACGC  
GAGGATCTTTTAACACAGTCAAAGGATAAAATCCATGAGACTTCATGTTACAAGATTCT  
GGTGCGGACAACCACTTATGGAATCTGGAGACCCATCTATCGGTCTAGACTCTAGGGGTT  
TACCCAAGAATCTAGGTATACTTAGAGATTTAATTCTAAGTGACGATATCTGGGACAGGA  
GGGTAGTTCATACTTTATTGTTAATAAGTAGAGCTATCCCTTGTAATGGTGAGATCTCGA  
TATCGAGTATCACTGACAAGGGGCCGATGTCAACCCGGATCTCTTGAAAGAGTATAGTT  
CTGTTTTTAAAGAACTAACTGAACCATTCAGTTCCAACCTTGGTCTGAATGCCATTTGT  
CTACAAAGTCGGGCCCAAACCTCCAGGCAATGATCGGATCAATTGCTGATCTTAATCATT  
TACCCCAAAGCTTGAGAGACGATATATCTGTTCTCGGAGGTCCAGAACTAACCAAAGTTA  
TGGATTTACTCTTTGAAAAGATAAATGTCAGAGCCTGAAACAGACATTTCAAAGTTAAAG  
ACAAGTCTTTAATTAGGAAGTTATCTGTTGTTTCTGACCCAGAGGGAAAAGAGCGAGTAA



TCGCTATTTTCGATTATTGGTCACAACTGCACTTAAACCCTTTCATGATAACTTATTTG  
AGTTATTATCAAAGATAAAAGGAGATTGTACCTTCAATCATTCCGCTGGGAGAAACCTTT  
CGGACAAGGCCAAGGGTCCGTACTATTCCATGGATCTAACAGCTGCTACAGACCGGTTCC  
CAATTTGGGTACAACGGCATGTAATAAGCGAGTTAGTCTCCGTAGAATACGCAGACTCCT  
GATCTCGGGTCATGACCTCTCACGAGTTTTCCGCTCCATTTGTTGACTCGCCATAAATT  
ATGGGGTAGGTCAGCCGATGGGAGCATACTCGTCGTGATCGGCATTTTCCCTATGCCATC  
ATCTTACCGTTAGAATTGCTGCGAAAAGGGCTGGGTTATCCAGTTCCTGATCTAAGTACA  
TTCTATTGGGAGATGATATAGTTCTAACTAATCCAAAAGTTGCTGATGAATATCAAAAAC  
TAATGGCTACGTTAGGAGTATCACTCTCTCCTACAAAGACACATGTGTCAAAGACACAT  
ATGAATTTGCAAAAAGATGATACCACGAAGGTAATGAGATCACCGGAATTCAACTTGGTC  
CGTTTTTGGCGCCAAGAATTGGGGCGGATTTGCATCCGCTCTACATGAATTCACAAGGT  
GAGGCATCAAACCTCATGAGGTGGAACCCGGTTCGATAGCTGCTGGACTTAGGGCTCTTG  
GTTTTGATAGACTAAGAGATACCCATAAGATCCAACTTTTTCTACACATCCCTGCAAAGG  
GAGATTCACCCGAAGAACGAAGTGAAAAGTCAATTTGACTTATCAATAAGTTCTTTAAAA  
GTGAAGTCGGCTGCAACAGACAGGTGACGTTTAAAGAGAAATTTGTTCTCCAAACGCTCG  
CTGAAGTTAAACAGCTTGTATAGAACTGCTATCAAGCTTATAGCAAAGGAAGTCTCTG  
CTTGGAACAGAGTCTTCCAGAGCTAGCAAGCTTAGGATTGGTTGACCAAAGTGTACTAT  
TAGCAATGCCACCTGTAGCTGTCTGCCGAAAGCAGCATTAGAAGTGAATCTGGGTTTCG  
ACAACTACGGAGTGCTTACTGAGATCTTGATGAAGACATTGTCTTCGGAGAGATTCCAA  
TAAGAGGAATTAATCCCTCTCGGGTTAATTCCGTACGTGCTAAAGAAGTTTTACTAGCAA  
CCAAAGTTCTGATCACTAATAGATACTCTCGCTGATCACGAGATTACCGGTATCTCGAG  
ACCACTTACTCTCTGACAAAGAGTATAGCGGTCTGCTAAATGACAACTTCCAACGGGGG  
AATCAAATCCTAGCTAAGGATTTGAAGAATAGTTTCTCACGAACTATTCCGGGATCCCC  
GTTGAGTATTGCCCTTTCTTCC

>EnmuMV3-KVL-14-117

CCTCCTTTAGGGAGGCCACGTCTGTTCTACCCCCATTGCTGGGCTAGTAGAAAACGCTT  
TCGCGCGTGCCATTGCTGACTTATCAGTAATCTCCGCGATAGATCCAGTTGGTGATAACT  
TCAACAGGATCCCTTGATAATACAAGTTAGTCGACTTGTCAACACATAGAAAGGTTCTA  
GATATTTCACTAGTTTAGTCTTTCTATCAATTCAGATTTAAACCTGAATAAATTAGCAAT  
AAGTAGTACAGTTGATGTACGAAAGAAAGGTTTGAAACTTCCTTCCCACAATAGAGCACA  
TAAACAATACTTACTATCATGAACTTAATACTACACAAAGACTCCATATTCTTATGAAA  
TGGGTTCTAAGGAAGTACTTCGGTTCAAGTCAAGTATATCAAGACTCGTATCTTCACTTT  
GTGAAGATATGGAACAGGTACGAATCAAAGTGGAAGTGTGTTGGACCGTTAAACGGTTC  
AAGCTTATCAGACTAGGCGTTACAAAATACCTAGCCGGACAAGTTCTCACTCCGACCGAA  
TGCCTAGGGATGACCAAAGATGGTCTTCCCAAAGCTTTAGGTCCGATGAAGGACCTGATT  
CGATCAAGAGATCCTCAGAACATAAGGTTCGTCCTAACAAATATTATATGTTGGAAGGGCT  
TATAGACCTAAGGAAGTATCGGGTTTCAACCAAGCGACTGTAAGAGATCTCTCTCGAGCA  
GACGCCAATGTTGTAAGTCAAGTCACTGATTTTATTCAACATAATGTTTTAAATAAATCT  
TCAGTGATGGCTTTTGACCCGAAGTGAATCAGTTTCACTTTACAGAGAAGGCGGGGCCA  
GCTGGCCACGCCCTTCTGACTTCGATTACGAATTTAAGATCTCTTCTAAGGAGTTATTA  
AACGATATAATAACTCTAGGAGGAGAAAGATTAGAAGAAGCAATTGAAAAAGTGCTTGCG  
ACTAATCCGGTCGTTCTTGACTATCTAGACTATCACAATGCAAAAGGTGATAGAAGAGAC  
AAGATCAGAGCGATATCTCTTAAACCTGATCGAGAAATGAAAGTGAGACCGTTTGCTTTA

CTAGATTACTGGAGTCAGACATGTCTGAAACCAGTCCACGATAATCTGTTTCGAAATTCTT  
AAAAGAATCAAAACAGATCATACGTTTTGATCACGGTAAAGCTATACAGGCTGTAAAGAAT  
CTTAAACCAAATGGTTCTTATCATAGCCTCGATTTATCGAGTGCTACAGATAGATTTCTT  
ATGGAACCTTCAGCATAATCTAATGAAACTCCTTATTGGAGAAACAAAAGCTAATGCTTGA  
AGAAGGATCTTAACAGGTCATGAGTTTGAGGTCTTCCAAACAGGTGATAAGCTCCAGTAC  
GGAGCCGGTCAACCGATGGGGGCCTACAGCTCATGAGCTGTATTTACGGTCTGTCACCAT  
ATTGTTATATGATATTGTGCCGGTTCAACCGCGTACAGTAACTATGCCATTATTGGTGAT  
GACGTGCTTATCGCAGATGATGACGTAGCTGATCGGTATGTAGAAGTGATCAAGGCCCTT  
GGGGTTGACATCTCTCCATCTAAATCTCATGTGTCCAAGGACACATTCGAAATAGCGAAG  
AGATGATCCTTCAAGGGGACCGAGGTAACACCTTTCCCGATCGACGGTTTATCGGTTATA  
TTCAATAAACCAGACATCCTTTACTTATTCTTATTAGAACAAGAAAAGAAAGGCTACATA  
GCAAAGGGAGGGATCGAATCCGCCTCTTCAATATCGTCATTGCTGCAACTCTTCGGACTG  
CCGGAGCGTAAAATACGTTTCGGCAGCGAAGCTTTACAGAATGATTGCCTTGTTTTCCCTTT  
ATCGGTAATAGACAAGGAGATTATAAAGATCCGAAAGGATTTTATCATCTTCTTGCTTT  
CCTGTATCATGTAACTGTCAAACGACATTTACATGAATGAGCTTAAAGCTTTTGCAGGA  
AGAGCAATCTTTAACCAAGTAGGGGGAAGAAAAGGTAAGATATGAAAGGCAGCAACATAC  
GGCTTTTTCGGTAGAATTTCTATCGAATTGACTTGTAGTTGCTCCCGGATTCGGGGCCACAT  
GAGTCAAATCAAGAGGCATCACTTTATCATCTACCCCAAGTGGGGTCTATGCTCTCACTA  
AGTCGAAATCTGCAAGCAGAATTCAACGAAGTAAGAATGATGGAAATAGATGAGAACTGA  
GATTATTTTCTAAACAGAAAAGTATCAATCCTTATCTCTGACCCGGTCATCGTGTTTAGC  
GGTGATCGGTCTCTTGAGGTCTTGGGTACTCAGGCTCAAATCGTACGTTGAGCGGTAGAA  
GGAATTAATCCGGATACCAAACCTCGTATCGACGAACTGAACGCCCTTCCGAAGAGTCA  
TTCCAAGATGATTCAGGAATATCAGACAGCGGGGTCAATTATGTTGTAAAGGTATTATCCTT  
ACTCATAACGCCCGTTGTCTCCTGAGTTCATTTCATAATGAAATGGCACCGAGAGGTGT  
GGGGTTCCTTTGGAAAGAATCCCGGACGTG

>EnmuMV3-KVL-14-118

TCGCGCGTGCCATTGCTGACTTATCAGTAATCTCCGCGATAGATCCAGTTGGTGATAACT  
TCAACAGGATCCCTTGATAATAACAAGTTAGTCGACTTGTACCACATAGAAAGGTTCTA  
GATATTTCACTAGTTTAGTCTTTCTATCAATTCAGATTTAAACCTGAATAAATTAGCAAT  
AAGTAGTACAGTTGATGTACGAAAGAAAGGTTTGAAACTTCCTTCCCACAATAGAGCACA  
TAAACAATACTTACTATCATGAAACTTAATACTACACAAAGACTCCATATTCTTATGAAA  
TGGGTTCTAAGGAAGTACTTCGGTTCAAGTCAAGTATATCAAGACTCGTATCTTCACTTT  
GTGAAGATATGGAACAGGTACGAATCAAAGTGTGGAAGTGTGTTGGACCGTAAAACGGTTC  
AAGCTTATCAGGTTAGGCGTTACAAAATACCTAGCCGGACAAGTTCTCACTCCGACCGAA  
TGCCTAGGGATGACCAAAGATGGTCTTCTTAAAGCTTTAGGTCCGATGAAGGACCTGATT  
CGATCAAGAGATCCTCAGAACATAAGGTTTCGTCTTAAACAATATTATATGTTGGGAGGGCT  
TATAGACCTAAGGAAGTATCGGGTTTCAACCAAGCGACTGTAAGAGATCTCTCTCGAGCA  
GACGCCAATGTTGTAAGTCAAGTCACTGATTTTATTCAACATAATGTTTTAAATAAATCT  
TCAGTGATGGCTTTTGACCCGAAGTGAAGTCACTTTACAGAGAAGGCGGGGCCA  
GCTGGCCACGCCCTTCTGACTTCGATTACGAATTTAAGATCTCTTCTTAAAGGAGTTATTA  
AACGATATAATAACTCTAGGGGGAGAAAGATTAGAAGAAGCAATTGAAAAAGTGCTTGCG  
ACTAATCCGGTCGTTCTGGACTATCTAGACTATCACAATGCAAAAGGTGATAGAAGAGAC  
AAGATCAGAGCGATATCTCTTAAACCTGATCGAGAAATGAAAGTGAGACCGTTTCGCTTTA  
CTAGATTACTGGAGTCAGACATGTCTGAAACCAGTCCACGATAATCTGTTTCGAAATTCTT

AAAAGAATCAAAACAGATCATACGTTTGATCACGGTAAAGCTATACAGGCTGTAAAGGAT  
CTTAAACCAAATGGCTCTTACCATAGCCTCGATTTATCGAGTGCTACGGATAGATTTCTT  
ATGGAACCTTCAGCATAATCTAATGAAACTCCTTATTGGAGAAACAAAAGCTAATGCATGA  
AGAAGGATCCTAACAGGTTATGAGTTTGAGGTCTTCCAAACAGGTGATAAGCTCCAATAC  
GGAGCCGGTCAACCAATGGGGGCCTATAGCTCATGAGCTGTATTTACGGTCTGTCACCAT  
ATTGTTATATGATATTGTGCCGGTTCAACCGCGTACAGTAACTATGCCATTATTGGTGAT  
GACGTCGTTATCGCAGATGATGACGTAGCTGATCGGTATGTAGAAGTGATCAAGGCCCTT  
GGGGTTGACATCTCTCCATCTAAATCTCATGTGTCCAAGGACACATTCGAAATAGCGAAG  
AGATGATCCTTCAAGGGGACCGAGGTAACACCTTTCCCGATCGACGGTTTATCGGTTATA  
TTCAATAAACCAGACATCCTTTACTTATTCTTATTAGAACAAGAAAAGAAAGGCTACATA  
GCAAAGGGAGGGATCGAATCCGCCTCTTCAATATCGTCACTGCTGCAACTCTTCGGACTG  
CCGGAGCGTAAAATACGTTCCGCAGCGAAGCTTTACAGAATGATTGCCTTGTTTCCCTTT  
ATCGGTAATAGACAAGGAGATTATAAAGATCCGAAAGGATTTTATCATCTTCTTGCTTT  
CCTGTATCATGTAACGTGTCAAATGACATCTACATGAATGAGCTTAAAGCTTTTGCAGGA  
AGAGCAATCTTTAACCAAGTAGGGGGAAGAAAAGGTAAGATATGAAAGGCAGCAACATAC  
GGCTTTTCCGTAGAAATTTCTATCGAACTGACTTGTAGTTGCTCCCGGATTCGGGCCACAT  
GAGTCAAATCAAGAGGCATCACTTTATCATCTACCCCAAGTGGGGTCTATGCTCTCACTA  
AGTCGAAATCTGCAAGCAGAATTCAACGAAGTAAGAATGATGGAAATAGATGAGAACTGA  
GATTATTTTCTAAACAGAAAAGTATCAATCCTTATCTCTGACCCGGTCATCGTGTITAGC  
GGTGATCGGTCTCTTGAGGTCTTGGGTA CT CAGGCTCAAATCGTACGTTGGGCGGTAGAA  
GGAATTAATCCGGATACCAA CT CGTATCGACGAAGTGAACGCCCTTCCGAAGAGTCA  
TTCCAAGATGATTCAGGAATATCAGACAGCGGGGTCAATTATGTTGTAAG

>EnmuMV3-HHdFL130914-1

CTCCTTTAGGGAGGCCACGTCTGTTCTACCCCCATTGCTGGGCTAGTAGAAAACGCTTT  
CGCGCGTGCCATTGCTGACTTATCAGTAATCTCCGCGATAGATCCAGTTGGTGATAACTT  
CAACAGGATCCCTTGATAATACAAGGTTAGTCGACTTGTCAACCATAGAAAAGGTTCTAG  
ATATTTCACTAGTTTAGTCTTTCTATCAATTCAGATTTAAACCTGAATAAATTAGCAATA  
AGTAGTACAGTTGATGTACGAAAGAAAGGTTTGAAACTTCCTTCCCACAATAGAGCACAT  
AAACAATACTTACTATCATGAACTTAATACTACACAAAGACTCCATATTCTTATGAAAT  
GGGTTCTAAGGAAGTACTTCGGTTCAAGTCAAGTATATCAAGACTCGTATCTTCACTTTG  
TGAAGATATGGAACAGGTACGAATCAAAGTGTGGAAGTGTGACCGTTAAACGGTTCA  
AGCTTATCAGACTAGGCGTTACAAAATACCTAGCCGGACAAGTTCTCACTCCGACCGAAT  
GCCTAGGGATGACCAAGGATGGTCTTCCTAAAGCTTTAGGTCCGATGAAGGACCTGATTC  
GATCAAGAGATCCTCAGAACATAAGGTTCTGTCCTAACAAATATTATATGTTGGGAGGGCTT  
ATAGACCTAAGGAAGTATCGGGTTTCAACCAAGCGACTGTAAGAGATCTCTCTCGAGCAG  
ACGCCAATGTTGTA ACTCAGATCACTGATTTTATTCAACATAATGTTTTAAATAAATCTT  
CAGTGATGGCTTTTGACCCAACTGAGATCAGTTTCACTTTACAGAGAAGGCGGGGCCAG  
CTGGCCACGCCCTTCTGACTTCGATTACGAATTTAAGATCTCTTCCTAAGGAGTTATTAA  
ACGATATAATACTCTAGGAGGGGAAAGATTAGAAGAAGCAATTGAAAAAGTGCTTGCGA  
CTAATCCGGTCGTTCTGGATTATCTAGACTATCACAATGCAAAAAGGTGATAGAAGAGATA  
AGATCAGAGCGATATCTCTTAAACCTGATCGAGAAATGAAAGTGAGACCGTTTCGCTTTAC  
TAGATTACTGGAGTCAGACATGTCTGAAACAGTTCACGATAATCTGTTGCAAAATCTTA  
AAAGAATCAAAACAGATCATACGTTTGATCACGGTAAAGCTATACAGGCTGTAAAGAATC  
TTAAACCAAATGGTTCTTACCATAGCCTCGATTTATCGAGTGCTACGGATAGATTCCTTA

TGGAAC TTCAGCATAATCTAATGAAACTCCTTATTGGAGAAACAAAAGCTAATGCTTGAA  
GAAGGATCTTAACAGGTTATGAGTTTGAGGTCTTCCAAACGGGTGATAAGCTCCAATACG  
GAGCCGGTCAACCGATGGGGGCCTATAGCTCATGAGCTGTATTTACGGTCTGTCACCATA  
TTGTTATATGATATTGTGCCGTTCAACCGGTACAGTAACTATGCCATTATTGGTGATG  
ACGTCGTTATCGCAGATGATGACGTAGCTGATCGGTATGTAGAAGTGATCAAGGCCCTTG  
GGGTTGACATCTCTCCATCTAAATCTCATGTGTCCAAGGACACATT CGAAATAGCGAAGA  
GATGATCCTTCAAGGGGACCGAGGTAACACCTTTCCCGATCGACGGTTTATCGGTTATAT  
TCAATAAAC CAGACATCCTTTACTTATTCTTATTAGAACAAGAAAAGAAAGGCTACATAG  
CAAAGGGAGGGATCGAATCCGCCTCTTCAATATCGTCATTGCTGCAACTCTTCGGACTGC  
CGGAGCGTAAAATACGTTCCGCAGCGAAGCTTTACAGAATGATTGCCTTGTTTCCCTTTA  
TTGGTAATAGACAAGGAGATTATAAGGATCCGAAAGGATTTTATCATCTTCTTGGCTTTC  
CTGTATCATGTAACGTGTCAAATGACATTTACATGAATGAGCTTAAAGCTTTTGCAGGAA  
GAGCAATCTTTAACCAAGTAGGGGGAAGAAAAGGTAAGATATGAAAGGCAGCAACATACG  
GGTTTTCGGTAGAATTTCTATCGAATTGACTTGTAGTTGCTCCCGATTCCGGCCACATG  
AGTCAAATCAAGAGGCATCACTTTATCATCTACCCCAAGTGGGGTCTATGCTCTCACTAA  
GTCGAAATCTGCAAGCAGAATTCAACGAAGTAAGAATGATGGAAATAGATGAGAACTGAG  
ATTATTTTCTAAACAGAAAAGTATCAATCCTTATCTCTGACCCGGTCATCGTGTTTAGCG  
GTGATCGGTCTCTTGAGGTCTTGGGTA CTGAGGTCAAATCGTACGTTGAGCGGTAGAAG  
GAATTAAATCCGGATACCAAACCTCGTATCGACGAACTGAACGCCCTTCTGAAGAGTCAT  
TCCAAGATGATTCAGGAATATCAGACAGCGGGTCATTATGTTGTAAAGGTATTATCCTTA  
CTCATAACGCCCGTTGTCTCTGAGTTCAATTCATAATGAAATGGCACCGAGAGGTGTG  
GGGTTCTTTGGAAAGAATCCCGGACGTGGCCTCCCTA

>EnmuMV3-Berkeley

CCTCCTTTAGGGAGGCCACGTCTGTTCTACCCCCATTGCTGGGCTAGTAGAAAACGCTT  
TCGCGCTTGCCATTGCTGACTTTATCAGTAATCATCGCGATAGATCCAGTTGGTGATAAC  
TTCAACAGGATCCCTTGATAATACAAGGTTAGTCGACTTGTCATCACATAGAAAGTTCT  
AGAATTTCTCTAGTTTAGTCTTTCTATCAATTCAGATTAACCTGAATAAATTAGCAAT  
AAGTAGTATAGTTGATATACGAAAGAAAGGTTTGAAACTTCCTTCCCACAATAGAGCACA  
TTACAATATCTACTATCATGAACTTAATACTACACAAAGACTCCATATTCTTATGAAAT  
GGGTTCTAAGGAAGTACTTCGGTTCAAGTCAAGTATATCAAGACTCGTATCTTCATTTTG  
TGAAGATATGGAACAGGTACGAATCAAAGTGTGGAAGTCTTGACCGTAAAACGGTTCA  
AACTTATCAGGCTAGGTGTTACAAAATACCTAGCCGGACAAGTTCTCACTCCGACCGAAT  
GCTTAGGAATGACCAAAGATGGTCTTCCAAAAGCGCTAGGTCCGATGAAGGACCTGATCC  
GATCAAGAGAACCTCAGAAATATAAGATTTGTCCTTACAATATTATATATTGGAAGGGCTT  
ATAGACCAAAGGAAGTATCGGGTTTCAACCAAGCGACTGTAAGAGATCTCTCTCGAGCAG  
ACGCCAATGTTGTAACCTCAGATCACTGATTTTATTAAACATCATGTTTTAAATAAATCTC  
CAGTGATGGCTTTTGACCCGAACTGAGATCAGTTTCACTTTACAGAGAAGGCGGGACCAG  
CTGGTCACGCCCTTCTAACTTCGATTACGAATTTAAGATCTCTACCAGAGGAGTTACTAA  
AAGATATAATAACTCTAGGTGGAGAAAGATTAGAAGAAGCAATCGAAAGAGTGCTTATGA  
CTAATCCTGTTGTCTTAGATTATCTGGACTATCACAATGCAAAAGGTGATCGTCGAAATA  
AAATAAGGGCAATATCTCTTAAACCTGATCGAGAAATGAAAGTGAGACCGTTTCGCTTTAC  
TAGATTACTGGAGTCAGACTTGTCTGAAACCAGTTCACGATAATCTGTTTGAAATTCTTA  
AACGAATTAAGACAGATCATACGTTTGATCACGGTAAAGCAATACAGTCAGTAAGAGATC  
TAATTCCTAACGGATCTTATCATAGTCTTGATTTATCAAGTGCTACTGATAGGTTCCCTA

TGGAAGCTCCAGCACAATCTAATGAACTCCTTATCGGAGAGACAAAAGCAGATGCATGGA  
GAAGAATCTTGACTGATCATGAATTTGAAGTCTTCCAGACGGGTGACAACTCCAATACG  
GAGCTGGTCAGCCTATGGGGGCTTACAGTTCA**TGAGCTGTATTTACGGTCTGTCA**CCATA  
TTGTAATATGATATTGTGCCGTTCAACCGCGTACAGTAACTATGCCATTATT**GGTGATG**  
**AC**GTCTTATCGCAGATGATGACGTAGCTGATCGATATGTAGAAGTGATCAAGGCCCTTG  
GAGTGGACATCTCTCCAGCAAAATCTCATGTATCTAAAGATACATTTGAAATTGCCAAGA  
GATGGTCATTCAAGGGGACCGAGGTTACACCTTTTCCGATCGACGGTTTATCAGTTATAT  
TTAATAAACCTGACATCCTTTATCTGTTCTTATTAGAACAGGAAAAGAAAGGCTACATAG  
CAAAGGGAGGGATCGAATCCAGCTCTTCAATCTCATCATTACTACAACCTTTTCCGACTGC  
CACTACGTAAAGTACGTGCGGCAGCGAACTTTATAGAATGATAGCCCTCTTCCATTCA  
TTGGTAACAGACAAGGAGATTATAAAGATCCGAAAGGATTTTATCATCTACTTGGCTTTC  
CTGTTTCATGTAATGTGTCAAATGACGTATACATGAATGAGCTAAAAGCTTACGCAGGAA  
GAGCAATCTTTAACCAAATTGGTGGAAGAAAGGGTAAGATTT**TGAAAAGCAGCTACATACG**  
GCTTTTCGGTAGAGTTTCTATCGAAT**TGACTAGTTGTAGCTCCAGGATTCGGGCCACATG**  
AGTCAAATCAAGAGGCATCACTATATCATCTACCCCAAGTGGGGTCTATGCTCTCACTAA  
GTAGAAATCTGCAAGCAGAATTCAACGAAGTAAGAATGATGGAAATAGATGAGAACT**GAG**  
ATTATTTCTAAACAGGAAAGTTTCAATCCTTATTTCTGACCCTGTCA**TCGTATTTAGCG**  
GTGACAGATCTCTTGAGGTCTTGGGTACTCAGGCTCAAATCGTACGAT**GAGCGGTAGAAG**  
GAATTAAATCCGGATACCAGACTCGTATCGACGA**ACTGAACGCCCTTCTGAAGAGTCAT**  
TCCAGAATGATT**CAGGAATATCAGATAGTGGGGTCATTATGTTGTAA**GGTATTATCCTTA  
CTCATAACGCCCACTATCCTCCTGAGTTCATTT**CATAATGAAATGGCACCGAAAGGTGTG**  
GGGTTCTTTGGAAAGAATCCCGGACGTGGCCTCCCTA

>EnmuMV3-HHdFL050913-1

CTCCTTTAGGGAGGCCACGTCTGCTTTACCCCCATTGCTGGGCTAGTAAAGAACGCTTT  
CGCGCTTGCCATTGCTGACTTATCAGTAATCGCATCTGCGATAGATCCAGTTGGTGATAA  
CTTCAACAGGATCCCTTGATAATACAAGTTAGT**CGACTTGTCATCACATGGAGGTAGGG**  
AGAGAAATCTCTATATCCATCAACTCGGGAT**aAAATCCGAGTAAATAGGCAATAAGTA**  
GTACAGTTGATGTACGAAAGAAAGGTTT**GAAACTTCCTTCCCACAA****TAG**ATACATATAAC  
AATATTTACTAT**CATG**AAACACAACACTACACAAAGACTCCATATTCTAATGAAATGGGT  
TCTAAGGAAGTATTTTGGTTCAAGTCAAGTATATCAAGACTCTTATCTTCACTTTGTGAA  
GATATGGAACAGGTACGAATCGAAGTGCGGGACTGTTT**TGAACCGTTAAACGATTCAAAT**  
GATCAGACTAAGTGTTACAAAATACTTAGCTGGTCAAGTTCTCACTCCGACGGAATGCAT  
CGGGATGACCAAAGATGGTCTTCCGAAGGCTTTAGGTCCAATGAAGGACCTTATCCGTTT  
TAGAGATCCTAGGAATATAAGGTTTGTCTTACAATATTGTATATTGGAAGGGCTTATAG  
ACCCAAAGAAGTTTCAGGTTTCAACCAAGCGACTGTCCGAGATCTCTCTCGAGCAGACGC  
CAATGTTGTAAACACAAATCACTGAGTTTATTAAACATCATGTTTTAAATAAATCACCAGT  
GATGGCTTTCGACCCTAACT**TGAGATCAGTTCCACTTTACAGAGAAAGCGGGGCTGCTGG**  
CCACGCTCTTCTTACTTCGATATCGAATTTAAGATCTCTCCCTGAAAGTTTGTAAATGA  
TATCAAACCTTTTAGGTGGAGATAAGTTAGAAGAAGCAATCGAAAGAGTGCTTATGACTAA  
CCCAGTCGTTCTAGATTATTTAGACGGTCACAATGCAAAGAGTGATCGGCGAAATAAAAT  
AAGAGCGATATCTCTTAAACCTGATAGAGAAATGAAAGTGAGACCGTTTGCCTTACTTGA  
TTACTGGAGTCAGACTTGTCTGAAACCAGTACACGATAGATTGTTTGACATTCTAAGGAA  
TATCAAAACAGATCACACGTTTGATCATGGTAAAGCAATACAGTCTGTTAAGAACCTAAT  
TCCAAAGGACCATTACCATAGCCTTGATTTATCAAGTGCTACAGATAGGTTTCCAATGGA

TCTTCAGCACAACTTAATGAACTCCTTATAGGAGATCAGAAGGCTGATGCTTGAAGAAG  
GATCTTAACAGAACACGAGTTTGAGGTCTTTCAAACGGGAGACAAGCTCCAATACGGAGC  
AGGTCAACCAATGGGAGCCTACAGCTCGTGAGCTGTATTTACGGTTTGTCACCATATTGT  
TATATGGTATTGTGCCGGTTCTACCGCGTACAATAACTATGCCATTATTGGTGATGACGT  
CGTTATCGCAGATGATGATGTCGCTGATCGGTATGTAGAAGTGATCAAGGCCCTTGGGGT  
TGATATATCACCTGCTAAATCTCACGTATCAAAAGATACATTCGAAATAGCAAAGCGATG  
ATCAATCAAGGGGACCGAGGTAACACCTTTTCCGATAGATGGTTTATCTGTTATATACAA  
TAAACCGGACATCCTTTACTTGTTCTTATTAGAGCAAGAAAAGAAAGGCTACATAGCAAA  
GGGAGGGATCGAATCCGGGTCTTCCATAAGATCATTGCTGCAACTTTTCCGACTGCCGGA  
GCGTAAATACGTTCCGGCAGCGAACTTTACAGAATGATAGCCTTATTTCTTTTCATTGG  
AAATAGAGAAGGAGATTATAAAGATCCAAAAGGATTTTATCATCTTCTTGGCTTCCCTGT  
CTCTTGTAATATATCAAACGATATATACTTGAGAGAGCTTAAAGCTTACGCAGGTAAAGC  
AATCTATGACCAAGTTGGAGGGAGAAAAGGTAAAATATGGAAGGCTGCCACTTATGGCTT  
TTCGGTAGAGTTTCTATCGAATTGACTAGTGGTAGCTCCTGGATACGGGCCTCATGAATC  
AAATCAAGAAGCATCATTATACCATCTTCCCCAAGTGGGGTCGATGTTATCACTAAGTCG  
AAATCTGCAAGCAGAGTTCAACGAAGTAAGAATGATGGCCATTGACGAGAACTGAGACTA  
TTTCTTAAACAGAAAAGTATCAATCCTTATCTCCGACCCAGTCATCGTATTTAGCGGTGA  
CAGGTCTCTTGAAGTCTTAGGTACTCAGGCTCAAATCGTACGATGAGCGGTTGAAGGAAT  
TAAATCCGGATACCAAACCTCGTATCGATGAACTGAATGCCCTTCCGAAGAGTCATTCCA  
AGATGACACAGGAATAACAGATAGTGGGGTCATTATTCTTTAAAGAGTATTATCTCTCAG  
GAATAACGCCCGCTATCTCCCTGTGCTTATTTTCATA

>EnmuMV4-KVL-14-117

CCCTCCTGACGAAGGGAGATACTCGCTACACGCGAGTTATGACAACTCACGGACGGTCC  
AAAAGCCCAGGAGCCCACTGCTCTTGATTAGCGACTCCGTTTCAACGAACCTCTTCGATA  
GAAGAGCTCCTAGTACTTATCAGTACGCTGAAAGGCAATCAGGAATGTCATACCTGATCT  
GACGATGGAAGGCTAATCCCCTAACCCATTGTTAAATAGGAAAGGAACTTTTCTATGTT  
CAATGAACAAGCGCGACCAAAACGCCAATATACTCGATTAAACAATTTAAATTTAAACAA  
CTTATCATCCAACCTCAGAGATGTAACAGTCTGAGTGAATGACAGCTATCTTAATGTTCAA  
AATGGTAACCTTTCTATCAGCGATTGATCTTGCCGATTAGAAAAGATGTCAAGGATAAC  
GGTGTGATCACACAATCAAACGAGTTAAACTCGCTAAATTATGTGTAACACGTTACCTA  
GCCGGACAGCCTATTAGGATTACTGGGGCACCCGATGTTGGAGTACGTCGAAATGGCTTA  
CCTAATTTAATAGGAAGACATCTTCGAGCACTCGCTATGTCAGGAACCGACAATGATATA  
AGACTACTAATGACATTACTGTCATGAAATAGAGCTTTACCAGGGTCCGCTTATTACCCA  
CCGTTGAGTACAATAACAGAGAAATCAAGAATGAAAGAGTCAGCTTTTGCTGAACTTTCT  
TTCTTAATTCCAATGGTTATGCAATCAATGGGTTTAGTAGGATCCAATTGTCCAAAGTGA  
TCAAAGTATCACCTAACGACTAAGGCCGGTCTAATGCAGTTGCACTAGTCTCGAGTCTG  
TTAGAAGCTAGAATCCTTCCGGATAAACTTATAGAAAATATAAGAATAGTCGGAGGGGAA  
GATCTTTATAAGAATATTAATTTTATAAAATTTCTAAACCTGAAAAGGTAGCAGAAAGA  
TTTAAATTAAGAATTTAAAGATAAAATTCTAAGAATTAGGAAGTTATCGATTGTAAAC  
GCCCCAGAGCGAAAATCGCGAGTAATCGCAATTTTAGACTACTGGAGTCAGTCTGCTCTA  
AAACCCCTTCACGACCGAGTATTCTCGATCTTGAAAGGATTAGAAGGAGACTGTACGTTT  
AGACAATCGGCACCTTCAAAATTCGTCTCTAACGGACCATACTTCTCATTAGATCTGTCA  
GCAGCGACTGACCGCTTCCCCTTGAAAGTTCAAGAGTTAGTAGTATAGTCAGCTAACAGGT

AGTGAGAAATATGCCAAAGCCTGATCGTCCATTCTTGTTGATCAAGAATTCTGATGTCCT  
TGAGAAAAGTGTAACGTTAAGTATAACGCGGGACAGCCTATGGGAGCGTATAGCTCCTGG  
GCCATCTTCGCGCTAACTCATCATATCATAATAAGGGTAGCCGCAATGAAGGTAGGGAAA  
TCCTTCTTCACGAAGTATGCCGTATTAGGAGATGATGTCGTCATTGCTGACGAATCCGTT  
GCAAATTCCTACAAGGACCTGATTCTGATCTCGGAGTAGATATCTCTGATACCAAATCG  
CATGTATCGAAAGATACATATGAGTTTGCTAAAAGATGATACCGAAACGGGGTCAACATT  
TCAGGAGCACAAGTTAATGCATTCATCAGCTCTAGAAAATGATTTCTAGTAGCGAATGAA  
TACAGAAATTTGTGTGGACTATGAGGGATTTCCGACTATGTAGCGGAACCCGGGGTTGTT  
AAAGCCTTATTCACTGCCTTGAATCACAACAAGGGGATGATTCCCCGAATTGTGAAGAAA  
GCAATGATGTTCTTGTCTCTTCCATGGGATAGACCTGACATGCCTAGGGACGAGCAAATT  
TTACAATTTATTCTGTTCTCAGCACCTCAAGTGCTAGGATGTCACCAATTTGCAAAAAT  
AGGGCCATGAATTTCTTCATGACCAGTTTAGCAGAGGTGAAATCCAGAATACTTGAACAG  
GGGCTTCTCAAAGTTCGGGGGAGTGCACTTGAAACGATTAAATCGTTAAAGTACATTCAC  
CAGGACTCTGAAGGTTCCGATGCCCAATCAATACTAAAGGCAGTTCAGCACTGATGGTA  
ACAGCTAATCAATATTCTCAGCTTGCTGAGGATATCGATGACTTGAGAGATCCCCTTGTA  
ACGACCCCGGAGAAATTGATTTTCAACGAGGTCCGCTACTTAGGGTTCGACTCTAGTCGT  
ATTAACGTTACCAGAAATGCTGAAATGCTAATGGCCACGAACGCTACATTGGTAAACCAA  
TATAAACGCTGACTGAAGGAGTATTTTCGAGCTTAGTCATAAAATACTAAGCGACGAATTA  
CTGGACCAGCACACAGAGCGATCGTTTGCAAGGAAGTTATTCCGAACAAAAGTGATCGGA  
TCTGTAATGCCGGGGTTCCCGTTATCAGGAGGAAAAGAATCCTCATCGTAACTGAGATAG  
CATTTTGCCATCCCCACTGCGAATGATATAGTGGTGTATAGTCACTATATTGCCTGATT  
AAATTCAGGGGGTTGCAGCGGGAGTATCTCCTCCAGTTTGG

>EnmuMV4-KVL-14-118

CCTGACGAAGGGAGATACTCGCTACACGCGAGTTATGACAAACTCACGGACGGTCCAAAA  
GCCCAGGAGCCCCTGCTCTTGATTAGCGACTCCGTTTCAACGAACCTCTTCGATAGAAG  
AGCTCCTAGTACTTATCAGTACGCTGAAAGGCAATCAGGAATGTCATACCTGATCTGACG  
ATGGAAGGCTAATCCCCTAACCCATTGTTAAAATAGGAAAGGAACTTTTCTATGTTCAAT  
GAACAAGCGCGACCAAAACGCCAATATACTCGATTAAACAATTTAAAATTAACAACACTTA  
TCATCCAACCTCAGAGATGTAACAGTCTGAGTGAATGACAGCTATCTTAATGTTCAAAATG  
GTAACCTTTCTATCAGCGATTGATCTTGCCGATTAGAAAAGATGTCAGGATAACGGTG  
TTGATCACACAATTAACGAGTTAAACTCGCTAAATTATGTGTAACACGTTACCTAGCCG  
GACAGCCTATTAGGATTACTGGGGCACCCGATGTTGGAGTACGTCGAAATGGCTTACCTA  
ATTTAATAGGAAGACATCTTCGAGCACTCGCTATGTCAGGAACCGACAATGATATAAGAC  
TACTTATGACATTACTGTCAATGAAATAGAGCTTTACCAGGGTCGGCTTATTACCCACCGT  
TGAGTACAATAACAGAGAAATCAAGAATGAAAGAGTCAGCTTTTGCTGAACTTTCTTTCT  
TAATTCCCATGGTTATGCAATCAATGGGTTTAGTAGGATCCAATTGTCCAAAGTGATCAA  
AGTATCACCTAACGACTAAGGCCGGTCTAATGCAGTTGCACTAGTCTCGAGTCTGTTAG  
AAGCTAGAATCCTTCCGGATAAACTTATAGAAAATATAAGAATAGTCGGAGGGGAAGATC  
TTTATAAGAATATTAATTTTATAAAATTTCTAAAACCTGAAAAGGTAGCAGAAAGATTTA  
AAATTAAGAATTTAAAGATAAAATTCTAAGAATTAGGAAGTTATCGATTGTAAACGCCC  
CAGAGCGAAAATCGCGAGTAATCGCAATTTTAGACTACTGGAGTCAGTCTGCCCTAAAC  
CCCTTCATGACCGAGTATTCTCGATCCTGAAAGGATTAGAAGGAGACTGTACGTTTAGAC  
AATCGGCGCCTTCAAAATTCGTTTCTAACGGACCATACTTCTCATTAGATCTGTCAGCAG  
CGACTGACCGCTTCCCCTTGAAAGTTCAAGAGTTAGTAGTTAGTCAGCTAACAGGTAGTG

AGAAATATGCCAAAGCCTGATCGTCCATTCTTGTTGATCAAGAATTCTGATGTCCTTGAG  
AAAAGTGTAACGTTAAGTATAACGCGGGACAGCCTATGGGAGCGTATAGCTCCTGGGCCA  
TCTTCGCGCTAACTCATCATATCATAATAAGGGTAGCCGCAATGAAGGTAGGGAAATCCT  
TCTTCACGAAGTATGCCGTATTAGGAGATGATGTCGTCATCGCTGACGAATCCGTTGCAA  
ATTCCTACAAGGACCTGATTCGTGATCTCGGAGTAGATATCTCTGATACCAAATCGCATG  
TATCGAAAGATACATATGAGTTTGCTAAAAGATGATACCGAAACGGGGTCAACATTTGAG  
GAGCACAAGTTAATGCATTCATCAGCTCTAGAAAATGATTTCTAGTAGCGAATGAATACA  
GAAATTTGTGTGGACTATGAGGGATTTCCGACTATGTAGCGGAACCCGGGGTTGTTAAAG  
CCTTATTCACTGCCTTGAATCACAACAAGGGGATGATTCCTCCGAATTGTGAAGAAAGCAA  
TGATGTTCTTGCTCTTCCATGGGATAGACCTGACATGCCTAGGGACGAGCAAATTTTAC  
AATTTATTCGTTCTCAGCACCTCAAGTGCTAGGATGTCACCAATTTGCAAAAAGTAGGG  
CCATGAATTTCTTCATGACCAGTTTAGCAGAGGTGAAATCCAGAATACTTGAACAGGGGC  
TTCTCAAAGTTCGGGGGAGTGCACCTTGAACGATTAAATCGTTAAAGTACATTCACCAGG  
ACTCTGAAGGTTTCGGATGCCCAATCAATACTAAAGGCAGTTCAGCACTGATGGTAACAG  
CTAATCAATATTCTCAGCTTGCTGAGGATATCGATGACTTGAGAGATCCCCTTGTAACGA  
CCCCGGAGAAATTGATTTTCAACGAGGTCCGCTACTTAGGGTTCGACTCTAGTCGTATTA  
ACGTTACCAGAAATGCTGAAATGCTAATGGCCACGAACGCTACATTGGTAAACCAATATA  
AACGCTGACTGAAGGAGTATTTTCGAGCTTAGTCATAAAATACTAAGCGACGAATTACTGG  
ACCAGCACACAGAGCGATCGTTTGCAAGGAAATTATTCCGAACAAAAGTGATCGGATCTG  
TAATGCCGGGGTTCCCGTTATCAGGAGGAAAAGAATCCTCATCGTAACTGAGATAGCATT  
TTGCCATCCCCACTGCGAATGATATAGTGGTGTATAGTCACTATATTGCCTGATTAAAT  
TCAGGGGGTTGCAGCGGGAGTATCTCC

>EnmuMV4-HHdFL130914-1

CTCCTGACGAAGGGAGATACTCGCTACACGCGAGTTATGACAACTCACGGACGGTCCAA  
AAGCCCAGGAGCCCACTGCTCTTGATTAGCGACTCCGTTTCAACGAACCTCTTCGATAGA  
AGAGCTCCTAGTACTTATCAGTACGCTGAAAGGCAATCAGGAATGTCATACCTGATCTGA  
CGATGGAAGGCTAATCCCCTAACCCATTGTTAAAATAGGAAAGGAACCTTTTCTATGTTCA  
ATGAACAAGCGCGACCAAAACGCCAATATACTCGATTAAACAATTTAAAATTAACAACACT  
TATCATCCAGCTCAGAGATGTAACAGTCTGAGTGAATGACAGCTATCTTAATGTTCAAAA  
TGGTAACCTTTCTATCAGCGATTGATCTTGCCGATTAGAAAAGATGGTCAAGGATAACGG  
TGTTGATCACACAATCAAACGAGTTAAACTCGCTAAATTATGTGTAACACGTTACCTAGC  
CGGACAGCCTATTAGGATTACTGGGGCACCCGATGTTGGAGTACGTGCAAATGGCTTACC  
TAATTTAATAGGAAGACATCTTCGAGCACTCGCTATGTCAGGAACCGACAATGATATAAG  
ACTACTTATGACATTACTGTCATGAAATAGAGCTTTACCAGGGTCGGCTTATTACCCACC  
GTTGAGTACAATAACAGAGAAATCAAGAATGAAAGAGTCAGCTTTTCGCTGAACCTTTCTTT  
CTTAATTCCCATTGGTTATGCAATCAATGGGTTTAGTAGGATCCAATTGTCCAAAGTGATC  
AAAGTATCACCTAACGACTAAGGCCGGTCTAATGCAGTTGCACTAGTCTCGAGTCTGTT  
AGAAGCTAGAATCCTTCCGGATAAACTTATAGAAAATATAAGAATAGTCGGAGGGGAAGA  
TCTTTATAAGAATATTAATTTTATAAAATTTCTAAACCTGAAAAGGTAGCAGAAAGATT  
TAAAATTAAGAACTTTAAAGATAAAATTCTAAGAATTAGGAAGTTATCGATTGTAAACGC  
CCCAGAGCGAAAATCGCGAGTAATCGCAATTTTAGACTACTGGAGTCAGTCTGCCCTAAA  
ACCCCTTCATGACCGAGTATTCTCGATCTTGAAAGGATTAGAAGGAGACTGTACGTTTAG  
ACAATCGGCGCCTTCAAATTCGTCTTAACGGACCATACTTCTCATTAGATCTGTACAGC  
AGCGACTGACCGCTTCCCCTTGAAAGTTCAAGAGTTAGTAGTTAGTCAGCTAACAGGTAG



TGAGAAATATGCCAAAGCCTGATCGTCCATTCTTGTTGATCAAGAATTCTGATGTCCTTG  
AGAAAAGTGTAACGTTAAGTATAACGCGGGACAGCCTATGGGAGCGTATAGCTCCTGGGC  
CATCTTCGCGCTAACTCATCATATCATAATAAGGGTAGCCGCAATGAAGGTAGGGAAATC  
CTTCTTCACGAACTATGCCGTATTAGGAGATGATGTCGTCATTGCTGACGAATCCGTTGC  
AAATTCCTACAAGGACCTGATTCGTGATCTCGGAGTAGATATCTCTGATACCAAATCGCA  
TGTATCGAAAGATACATATGAGTTTGCTAAAAGATGATACCGAAACGGGGTCAACATTTT  
AGGAGCACAAGTTAATGCATTCATCAGCTCTAGAAAATGATTTCTAGTAGCGAATGAATA  
CAGAAATTTGTGTGGACTATGAGGGATTTCCGACTATGTAGCGGAACCCGGGGTTGTTAA  
AGCCTTATTCACTGCCTTGAATCACACAAGGGGATGATTCCCCGAATTGTGAAGAAAGC  
AATGATGTTCTTGCTCTTCCATGGGATAGACCTGACATGCCTAGGGACGAACAAATTTT  
ACAATTTATTCGTTCTCAGCACCTCAAGTGCTAGGATGTCACCAATTTGCAAAAAGTAG  
GGCCATGAATTTCTTCATGACCAGTTTAGCAGAGGTGAAATCCAGAATACTTGAACAGGG  
GCTTCTCAAAGTTCGGGGGAGTGCACTTGAAACGATTAAATCGTTAAAGTACATTCACCA  
GGACTCTGAAGTTTCGGATGCCCAATCAATACTAAAGGCAGTTCAGCACTGATGGTAAC  
AGCTAATCAATATTCTCAGCTTGCTGAGGATATCGATGACTTGAGAGATCCCCTTGTAAC  
GACCCCGGAGAAATTGATTTTCAACGAGGTCCGCTACTTAGGGTTCGACTCTAGTCGTAT  
TAACGTTACCAGAAATGCTGAAATGCTAATGGCCACGAACGCTACATTGGTAAACCAATA  
TAAACGCTGACTGAAGGAGTATTTTCGAGCTTAGTCATAAAATACTAAGCGACGAATTACT  
GGACCAGCACACAGAGCGATCGTTTGCAAGGAAATTATTCCGAACAAAAGTGATCGGATC  
TGTAATGCCGGGCTTCCCGTTATCAGGAGGAAAAGAATCCTCATCGTAACTGAGATAGCA  
TTTTGCCATCCCCACTGCGAATGATATAGTGGTGTATAGTCACTATATTGCCTGATTAA  
ATTCAGGGGGTTGCAGCGGGAGTATCTCCTCCAGTTTGGAG

>EnmuMV4-Berkeley

CCCTCCTGACGAAGGGAGATACTCGCTACACGCGAGTTATGACAACTCACGGAAGGTCC  
AAAAGCCCAGGAGTCCACTGCTCCTGATTAGCAACTCCGTTTCAACGAACCTCTTCGATA  
GAAGAGCTCTTAGTACTAATCAGTACGCTGAAAGGCAATCAGGAATGTCATACCTGATCT  
GACGATGGAAGGCTAATCCCCTAACCCATTGTTAAATAGGAAAGGAGCTTTTCTATGTT  
CAATGAACAAGCAGGACCAATACACCAATATAC TAGATT AACAATTTAAAATTTAAACAA  
CTTATCATCCAGCTCAGAGATGTAACAGTCTGAGTAAATGACAGCTATCTTAATGTTCAA  
AATGGTAACCTTTCTATCAGCGATTGATCTTGCCGATTAGAAAAGATGTC AAGGATAAC  
GGTGTGATCACACAATTAACGAGTTAAACTCGCAAAATTATGTGTAACACGTTACCTA  
GCCCGACAGCCTATTAGGATTACTGGGGCACCCGATGTTGGAGTGCGAAGAAATGGCTTA  
CCTAATTTAATAGGAAGACATCTCCGAGCGCTCGCTATGTCAGGGACCGACAATGATATA  
AGACTACTTCTGACATTACTGTCATGAAATAGAGCTTTACCAGGGTCCGCTTATTACCCA  
CCGTTGAATACAATAACAGGGAAATCAGAAATGAAAGAATCAGCTTTCGCTGAACCTTCT  
TTCCTAATCCCCATGGTTATGCAATCAATGGGTTTAGTAGGATCCAATTGTCCAAAGTGA  
TCAAAGTATCACTTAACGACTAAGGCCGGTCTAATGCTGTTGCACTAGTCTCGAGTCTA  
TTAGAAGCTAGAATCCTTCCGGATAAACTTATAGAAAATATAAGGATAGTCGGAGGGGAA  
GATCTTTATAAGAACATTAATTTCAATAAATTTCTAAAACCTGAAAAGGTTGCAGAAAGA  
TTTAAATTAAGAACTTTAAAGATAAAATTCTAAGAATTAGGAAGTTATCAATTGTAAAC  
GCCCCAGAGCGTAAATCGCGAGTAATCGCGATTTTAGACTACTGGAGTCAGTCTGCTTTA  
AAACCTCTTCATGATCGAGTTTTCTCGATACTGAAAGGATTAGAAGGAGACTGTACGTTT  
AGACAATCAACACCTTCAAAATTCGTTTCTAACGGACCATATTTCTCATTAGATCTGTCA  
GCAGCGACTGACCGCTTCCCCTTGAAAGTTCAAGAGTTAGTAGTTAGTCAACTGACAGGT

AGCGAGAAATATGCCAAAGCCTGATCGTCCATTCTTGTTGATCAAGAATTCTGATGTCCT  
TGAGAAAAGTGTAACGTTAAGTATAATGCGGGGCAGCCTATGGGAGCATATAGCTCTTGG  
GCCATCTTCGCGTTAACTCATCATATCATAATAAGAGTAGCCGCAATGAAGGTAGGGAAA  
TCCTTCTTCACGAACACGCTGTATTAGGAGATGATGTCGTCATTGCTGACGAATCCGTT  
GCAAATTCCTACAAGGACCTGATTCTGTGATCTCGGAGTAGATATATCTGATAACAAATCG  
CACGTATCGAAAGATACATACGAATTTGCTAAAAGATGATATCGAAACGGGGTCAATATT  
TCAGGAGCACAAGTTAATGCATTCATCAGCTCTAGGAAGTGATTCTCTGGTGGCCAATGAG  
TACAGAACTTGTGTGGACTGTGAGGGATTTCCGACTATGTAGCGGAACCCGGGGTTGTT  
AAAGCCTTATTACCCGCTTAAATCACAATAAGGGGATGATTCTCGAATTGTGAAGAAA  
GCGATGATGTTCTTGTCTCTCCCGTGGGATAGACCTGACATGCCAAGGGATGAACAAATT  
TTACAATTTATTCTGTTCTCAGCACCTCAAGTGCTAGGATGTCACCAATTTGCAAAAAT  
AGAGCCATGAATTTCTTCATGACCAGTTTAGCAGAGGTGAAATCCAGAATACTTGAACAG  
GGGCTTCTCAAAGTTCGGGGGAGTGCACTTGAAACGATTAAATCGCTAAAGTACATTCAC  
CAAGACTCTGAAGGTTCCGGATGCCCAATCGATACTAAAGGCAGTTCAGCTTTAATGGTA  
ACAGCTAATCAATATTCTCAGCTTGCTGAGGATATAGATGACTTGAGAGATCCCCTTG  
ACGACTCCAGAGAAATTGATTTTCAATGAAGTACGTTACTTAGGTTTCGACTCTAGTCGT  
ATTAACGTTACTAGAAATGCTGAAATGCTAATGGCCACGAACGCTACATTGGTAAACCA  
TATAAACGCTGATTGAAGGAGTATTTCGAACTTAGTCATAAAATACTAAGTGACGAGTTA  
CTGGACCAGCACACAGAGCGATCATTTGCACGGAAGTTATTCCGAACAAAAGTGATTGGA  
TCTGTAATGCCGGGGTTCCCGTTATCAGGAGGAAAAGAATCCTCATCGTAACTGAGATAG  
CACTTTGCCATCCCCACTGCGAAAGATATAGTGGTGTGATAATCACTATATTGCCTGATT  
AAATTCAGGGGGTTGCAGCGGGAGTATCTCCTCCAGTTTGGAG

>EnmuMV5-KVL-14-117

CGCCATCATGGCGGAATAGCTAATAACTGCTACCCGTAGTAGACTCTCTTAGAGGATAT  
TACTCCTTTAAGATTATCTATCTACTATAGCGTCCCTAGGTTTCGATGGGCCCTCTGTCT  
AGAAAGACTAGAGAAGGTCGAGACTGATTGGTAACCCGTTACAATAGTCCTCATCCTAGT  
GGATGTAGGTCGTCGTAGACCAGCAGGAGAGAAGGCTAATCCCCTAAACTCTTCTCGCGA  
TCACTAATGAGTCGTCCTATTGGAAGCCAATTCCTACCCACCATTATAAACATAAACAC  
GATTTCAACAACCTATTTAACTTCTCCAGGTGTATAACCTGGATGATTAAATGGTTCTA  
TCCAACCGTGCTCAGTCATAATGGGATTTTCAAGGATTCGTACCAACGATGTTTCGAGGC  
GCAACTGCGCTGAGAAAAGCACCGAGGACGAATCTGATGCTCGGACCACTCGAACTGGT  
CAAGCTCTGTGTCTTAAGGTATCTCGAGGGAAGACCTCTCGAGGAACCTGCAGGACTTTC  
GATGACTAAAGATAAATTACCTAAGGTTATACCTCAGGATATTCTCAATAGCATCCGATT  
AAGGGACTTGAAAGTTATTTCAAGTATTCTATCAGTATTTTCACTGACAGATTCCTTAA  
AGGTGGAAAGCCTGTAGACATAAAGACTATCACAGCTCCGTGGTCAGGATCCATTCTTTC  
CGATGTGGAGAAATGAATTCCTGATTTTCTGGACCGATGACATATCGAGCCATTTGATAC  
TGACTGAGGTAAATATCATTTTACCCTCAGAGCAGGACCAATGGACCCGCTCTTGCTGG  
AAGTCTATTGGACTATCAAGCTCTAACAGAGCCTCTCAAAGAGAAGTTAAACTTCTCGG  
AGGAGAGTACTTTGCTATGAACTTGATGAGTTAGAAGAGTGATACACTCAAACCTAACAT  
TCCAAAGTGCCTAATTAAGGTTTTCAAACCTTAAAGATCCAAAAGGACCTATTAAGTTAGC  
AAAACCTCTCAGTTAGGGATGACAGTTCATGTAAATCACGAATATTTGGAATACTAGACTA  
TTTTTCTCAAACAGTCTTGTATGTATCCATTCGTGCCTGTTTCGATATCCTAAGAAGGAT  
GCCGACAGACATGACCTTTGATCAGACTAGGGGATTAACATCCCTTAGACCGGACAAAG

GTCATCTTTCCACTCAATTGATCTAACAGCCGCTACAGACAGGTTTCCTGTAAAATTACA  
GACTCTTGTCTAGCTAAGCTGATAGGTGATGCCGAAAGCAAAAGTTTGGGAATCTGTCT  
CATAGATAGAGACTACTACCTCAAAGGGAAACCATGGCGTTATGCCGTAGGTCAACCAAT  
GGGAGCGTACTCATCATGAGCGACATTTGCCTTAACTCACCATCTAGTAGTATATTGTGC  
TGCTAGACGGGCTGGAATCCTAAAATTCAGTAATTACCGAATTTTAGGGACGATATTGT  
GATCGGAAATGATCAGGTAGCCCACCATTATCGAGAGATAATGACCCATTTAGGGTGTGG  
ATTTTCTGAGAAGAAAACCTCACGTGAGCCCAGATTTCTTTGAATTTTCAAAGAGACTGGT  
TTACCAAGGTCAAGAATTCTCTATCTTTCCATTGTCCGGTCTTATAGAAGTGGTGCCTAA  
ATGGCACTTACTCTATGAGTTCCTAAAACAAGTAGAAAACAGAGGATTCGAAATCCAGAG  
AAGTTATTGCAACCCCGGTCTAATTTCTGATCTCCTGGAATGTTTCGGAAAACCTCTCAG  
ACTACGTCTGATGTACATTGAAACATGACAGGGATGGCTGCACTTCCTATTGGAAGGAA  
TGTAAGATTATGAAACGGCAGGCGAGAGTGACAAAGTGCTCTCCCGGTTGTTTAATATCTC  
ATTCTCATGTAACCTTATCTCTCAAATCTTTGGGTAGAATTCTATCCAATCATGCGAGAGA  
TGCGTACACATGATCGCAAGCCAGATCAGCTGAAAAGGTGATCACTAAAGCTGAAGAATG  
ACAAGAGCGAACTCTTGCAATTCTTGAAGCAGATAGTGGTCCTCTTCTCAGTGCTTCTGA  
CCAAGAAGCATTGTTGGATCAATGAGCAATGGTAGCTCCTCCTTTAGTGGTGTTCGCGCA  
ACTTGCGTGGACGACCATTGAAGGGATAGAGCCAGACGTAGAGATGGGGGATCCAATTGA  
ATACATATGAGATAAACTCATTGTAAGAAATTGATTACCCTCCCCGAGTCCGAAGGAAT  
CCTTCCTACTCGATCCAGTCATCAACACGCTGGGTGCGTGCAGCTTACCTGAAATCTCT  
AGTATCGGTGATCCACCGATATAGACTTGGGAAACGGCCTGGA<sup>TAG</sup>ACCGTTTAGTCCCC  
TTTGGCCGCTCTAGATAAAATACCAATAATAGTTCAAATCTATTATTGGGGGATGACT  
AGAGAGCTATTCGCGCCAAGATGGCGC

>EnmuMV5-KVL-14-118

GCGGAATAGCTAATAACTGCTACCCGTAGTAGACTCTCTTAGAGGATATTACTCCTTTA  
AGATTATCTATCTACTATAGCGTCCCTAGGTTTCGATGGGCCCTCTGTCTAGAAAGACTA  
GAGAAGGTCGAGACTGATTGGTAACCCGTTACAATAGTCCTCATCCTAGTGGATGTAGGT  
CGTCGTAGACCAGCAGGAGAGAAGGCTAATCCCCTAACTCTTCTCGCGATCAC<sup>TAA</sup>TGA  
GTCGTCACTATTGGAAGCCAATTCCTACCCACCATTATAAACATAAACACG<sup>ATT</sup>TTCAAC  
AACCTATTTAACTTCTCCAGGTGTATAACCTGG<sup>ATG</sup>ATTAAATGGTTCTATCCAACCGTG  
CTCAGTCATAATGGGATTTTCAAGGATTTCGTACCAACGATGTTTCGAGGCGCAACTGCGC  
TGAGAAAAGCACCGAGGACGAATCTGATGCTCGGACCACTCGAACTGGTCAAGCTCTGT  
GTCTTAAGGTATCTCGAGGGAAGACCTCTCGAGGAACCTGCAGGACTTTTCGATGACTAAA  
GATAAATTACCTAAGGTTATACCTCAGGATATTCTCAATAGCATCCGATTAAGGGACTTG  
AAAGTTATTTCAAGTATTCTATCAGTATTTTCACTGACAGATTCTTAAAAGGTGGAAAG  
CCTGTAGACATAAAGACTATCACAGCTCCGTGGTCAGGATCCATTCTTCCGATGTGGAG  
AAATGAATTCCTGATTTTCTGGACCGATGACATATCGAGCCATTTGATACTGACTGAGGT  
AAATATCATTTTACCCTCAGAGCAGGACCAATGGACCCGCTCTTGCTGGAAGTCTATTG  
GACTATCAAGCTTTAACAGAGCCTCTCAAAGAGAAGTTAAACTTCTCGGAGGAGAGTAC  
TTTGCTATGAACTTGATGAGTTAGAAGAGTGATACACTCAAATAACATTCCAAAGTGC  
CTAATTAAGGTTTTCAAACCTTAAGGATCCAAAAGGACCTATTAAGTTAGCAAACTCTCA  
GTTAGGGATGACAGTTCATGTAAATCACGAATATTTGGAATACTAGACTATTTTTCTCAA  
ACAGTCTTGATGTCATCCATTTCGTGCCTGTTTCGATATCCTTAGAAGGATGCCGACAGAC  
ATGACCTTTGATCAGACTAAGGGATTAACATCCCTTAGACCGGACAAAGGGTCATCTTTC  
CACTCAATTGATCTAACAGCCGCTACAGACAGGTTTCCTGTAAAATTACAGACTCTTGTC

CTAGCTAAGCTGATAGGTGATGCGAAAGCAAAAGTTTGGGAATCTGTCCTCATAGATAGA  
GACTACTACCTCAAAGGGAAACCATGGCGTTATGCCGTAGGTCAACCAATGGGAGCGTAC  
TCATCATGAGCGACATTTGCCTTAACTCACCATCTAGTAGTATATTGTGCTGCTAGACGG  
GCTGGAATCCTAAAATTAGTAATTACCGAATTTTAGGGGACGATATTGTGATCGGAAAT  
GATCAGGTAGCCCACCATTATCGAGAGATAATGACCCATTTAGGGTGTGGATTTTCTGAG  
AAGAAAACCTCACGTGAGCCCAGATTTCTTTGAATTTTCAAAGAGACTGGTTTACCAAGGT  
CAAGAATTCTCTATCTTTCCATTGTCCGGTCTTATAGAAGTGGTGCCTAAATGACACTTA  
CTCTATGAGTTCCTAAAACAAGTAGAAAACAGAGGATTCGAAATCCAGAGAAGTTATTGC  
AACCCCGGTCTAATTTCTGATCTCCTGGAATGTTTCGGAAAACCTCTCAGACTACGTCTG  
ATGTACATTGCAAACATGACAGGGATGGCTGCACTTCCTATCGGAAGGAATGTAGATTAT  
GAAACGGCAGGCGAGAGTGCACAAGTGCTCTCCCGGTTGTTTAATATCTCATTCTCATGT  
AACTTATCTCTCAAATCTTTGGGTAGAATTCTATCCAATCATGCGAGAGATGCGTACACA  
TGATCGCAAGCCAGATCAGCTGAAAAGGTGATCACTAAAGCTGAAGAATGACAAGAGCGA  
ACTCTTGCAATTCTTGAAGCAGATAGTGGTCTCTTCTCAGTGCTTCTGACCAAGAAGCA  
TTGTTGGATCAATGAGCAATGGTAGCTCCTCCTTTAGTGGTGTTGCGCGAACTTGCGTGA  
ACGACCATTGAAGGGATAGAGCCAGACGTAGAGATGGGGGATCCAATTGAATACATATGA  
GATAAACTCATTGTAAGAAATTGATTACCCTCCCCGAGTCCGAAGGAATCCTTCCTACT  
CGATCCAGTCATCAACACGCTGGGTGCGTGCAGCTTACCTGAAATCTCTAGTATCGGTG  
ATCCACCGATATAGACTTGGGAAACGGCCTGGATAGACCGTTTAGTCCCCTTTGCCCGCC  
TCTAGATAAAATACCAATAATAGTTCAAATCTATTATTGGGGGATGACTAGA

>EnmuMV5-HHdFL130914-1

GCGCCATCATGGCGGAATAGCTAATAACTGCTACCCGTAGTAGATTCTCTTAGAGGATA  
TTACTCCTTTAAGATTATCCATCTACTATAGCGTCCCTAGGTTTCGATGGGCCCTCTGTC  
TAGAAAGACTAGAGAAGGTCGAGACTGATTGGTAACCCGTTACAATAGTCCTCATCCTAG  
TGGATGTAGGTCGTCTGATAGACCAGCAGGAGAGAAGGCTAATCCCCTAACTCTTCTCGCG  
ATCACATAATGAGTCGTCACTATTGGAAGCCAATTCCTACCCACCATTATAAACATAAACA  
CGATTTCACAACCTATTTAACTTCTCCAGGTGTATAACCTGCGATTAATGTTTCT  
ATCCAACCGTGCTCAGTCATAATGGGATTTGAGAGGATTCGTACCAACGATGTTTCGAGG  
CGCAATTGCGCTGAGAAAAGCACCGAGGACGAATCTGATGCTCGGACCACTCGAACTGG  
TCAAGCTCTGTGTCTTAAGGTATCTCGAGGGAAGACCTCTCGAGGAACCTGCAGGACTTT  
CGATGACTAAAGATAAATTACCTAAGGTTATACCTCAGGATATTCTCAATAGCATCCGAT  
TAAGGGACTTGAAAGTTATTTCAAGTATTCTATCAGTGTTTTCACTGACAGATTCCTTAA  
AAGGTGGAAAGCCTGTAGACATAAAGACTATCACAGCTCCGTGGTCAGGATCCATTCCTT  
CCGATGTGGAGAAATGAATTCCTGATTTTCTGGACCGATGACATATCGAGCCATTTGATA  
CTGACTGAGGTAAATATCATTTTACCCTCAGAGCAGGACCAAATGGACCCGCTCTTGCTG  
GAAGTCTATTGGACTATCAAGCTTTAACAGAGCCTCTCAAAGAGAAGTTAAACTTCTCG  
GAGGAGAGTACTTTGCTATGAACTTGATGAGTTAGAAGAGTGATACACTCAAATAACA  
TTCCAAAGTGCCTAATTAAGGTTTTCAAACCTTAAGGATCCAAAAGGACCTATTAAGTTAG  
CAAACTCTCAGTTAGGGATGACAGTTCATGTAAATCACGAATATTTGGAATACTAGACT  
ATTTTTCTCAAACAGTCTTGATGTATCCATTTCGTGCCTGTTTCGATATCCTAAGAAGGA  
TGCCGACAGACATGACCTTTGATCAGACTAGGGGATTAACATCCCTTAGACCGGACAAAG  
GGTCATCTTTCCACTCAATTGATCTAACAGCCGCTACAGACAGGTTTCCTGTAAAATTAC  
AGACTCTTGTCTAGCTAAGCTGATAGGTGATGCGAAAGCAAAAGTTTGGGAATCTGTCC  
TCATAGATAGAGACTACTACCTCAAAGGGAAACCATGGCGTTATGCCGTAGGTCAACCAA

TGGGAGCGTACTCATCATGAGCGACATTTGCCTTAACTCACCATCTAGTAGTATATTGTG  
CTGCTAGACGGGCTGGAATCCTAAAGTTCAGTAATTACCGAATTTTAGGGGACGATATTG  
TGATCGGAAATGATCAGGTAGCCACCATTATCGAGAGATAATGACCCATTTAGGGTGTG  
GATTTTCTGAGAAGAAAACCTCACGTGAGCCAGATTTCTTTGAATTTTCAAAGAGACTGG  
TTTACCAAGGTCAAGAATTCTCTATCTTTCCATTGTCCGGTCTTATAGAAGTGGTGCCTA  
AATGGCACTTACTCTATGAGTTCCTAAAACAAGTAGAAAACAGAGGATTCGAAATCCAGA  
GAAGTTATTGCAACCCCGGTCTAATTTCTGATCTCCTGGAATGTTTCGGAAAACCTCTCA  
GACTACGTCTGATGTACATTCGAAACATGACAGGGATGGCTGCACTTCCTATCGGAAGGA  
ATGTAGATTATGAAACGGCAGGCGAGAGTGCACAAGTGCTCTCCCGGTTGTTTAATATCT  
CATTCTCATGTAACCTTATCTCTCAAATCTTTGGGTAGAATTCTATCCAATCATGCGAGAG  
ATGCGTACACATGATCGCAAGCCAGATCAGCTGAAAAGGTGATCACTAAAGCTGAAGAAT  
GACAAGAGCGAACTCTTGCAATTCTTGAAGCGGATAGTGGTCCTCTTCTCAGTGCTTCTG  
ACCAAGAAGCATTGTTGGATCAATGAGCAATGGTAGCTCCTCCTTTAGTGGTGTTCGCGC  
AACTTGCGTGAACGACCATTGAAGGGATAGAGCCAGACGTAGAGATGGGGGATCCAATTG  
AATACATATGAGATAAAACTCATTGTAAGAAATTGATTACCCTCCCCGAGTCCGAAGGAA  
TCCTTCCTACTCGATCCAGTCATCAACACGCTGGGTGCGGTGCAGCTTACCTGAAATCTC  
TAGTATCGGTGATCCACCGATATAGACTTGGGAAACGGCCTGGATAGACCGTTTAGTCCC  
CTTTGCCCGCCTCTAGATAAAATACCAATAATAGGTTCAAATCTATTATTGGGGGATGAC  
TAGAGAGCTATTTCGCGCCAAGATGGCGC

>EnmuMV5-Berkeley

GCGCCATCATGGCGCGAATAGCTAATAACTGCTACCCGTAGTAGACTCTCTTAAGAGAAT  
AAAATCTCTTAGGATTATCTATCTACTATAGCGTCCCTAGGTTTCGATGGGCCCTCTGTC  
TAGAAAGACTAGAGAAGGTGAGACTGGTTGGTAACCCGTTACAATAGTCCTCATCCTAG  
TGGATGTAGGTCGTCGTAGACCAGCAGGAGAGAAGGCTAATCCCCTAACCTCTTCTCGCG  
ATCACATAATGAGTCGTCACTATTGGAAACCAATTCCTACCCACCATTATATACATAAACA  
CGATTTCACAACCTTATTTAACTTCTCCAGGTGTATAACCTGGATGATTAAATGGTTCT  
ATCCAACCGTGCTTAGTCATAATGGGATTTTACAGAGGATTTCGTACCAGCGGTGTTTCGAAG  
CGCAAATGCGCTGAGAAAAGCACCAGGGGACGAATCTGATGCGCGGACCATTGCAAATCGG  
TCAAGCTCTGTGTCTTACGGTATCTCGAGGGAAGACCTCTCGAGGAACCTGCAGGACTTT  
CGATGACTAAAGATAAATTACCTAAGGTTATACCTCAGGATATTCTCGATAGCATCCGAT  
TAAGGGACTTGAAAGTTATTTCAAGTATACTGTCAGTGTTTTTCATTGACAGATTCCTTAA  
AAGGTGGAAAGCCTGTAGACATAAAGACTATCACAGCTCCGTGGTCAGGGTCCATTCTT  
CCGATGTGGAGAAATGAATCCCTGATTTTCTGGACCGGTGGCATATCGAGCCATTTGATA  
CTGACTGAGGTAAATATCATTTTACTCTCAGGGCAGGACCAAATGGACCCGCTCTTGCTG  
GGAGTCTATTGGATTATCAAGCTCTAACAGAGCCTCTCAAAGAGAAATTAATTTCTCG  
GAGGAGAGTACTTTGCTATGAACTTGATGAGTTAGAAGAGTGATACACTCAAACCTAACA  
TTCCAAATGCCTAATTAAGTTTTCAAACCTTAAAGATCCGAAAGGACCTATCAAGTTAG  
CAAACCTTTTCAGTTAGGGATGACAGTTCATGTAAATCACGAATATTTGGTATACTCGACT  
ATTTTTCGCAAACAGTCTTGATGTATCCATTTCGTGCCTGTTTGATATCCTGCGAAGGA  
TGCCAACAGACATGACCTTTGACCAGACTAAAGGATTAAATCCCTTAGACCCGATAAAG  
GGTCATCATTCCACTCAATTGATCTAACAGCCGCTACAGATAGATTTCTGTAAAATTAC  
AGACTCTAGTCTTAGCTAAGCTGATAGGTGATGCGAAAGCAAAGGTTTGGGAATCTGTCC  
TCATTGATAGAGATTACTACCTAAAAGGGAAACCTTGGCGTTATGCCGTTGGTCAACCTA  
TGGGAGCATACTCATCATGAGCGACATTTGCCTTAACTCACCATCTAGTAGTATATTCTG

CTGCTAGACGGGCTGGAATCCTAAAATTTAGTAATTACCGAATTTTATGGGGACGATATTG  
TGATCGGAAATGATCAGGTAGCCCACCATTATCGAGAGATAATGACCCAACTTGGGTGTG  
GATTTTCAGAAAAGAAAACCTCACGTGAGCCCAGATTTCTTTGAATTTTCAAAGAGACTGG  
TATACCAAGGTCAAGAATTCTCTATCTTTCCATTGTCAGGACTAATAGAGGTAGTGCAGA  
AATGACACTTACTCTACGAGTTCCTTAAACAAGTAGAAAACAGAGGATTCGAAATCCAGA  
GAAGTTATTGCAACCCCGGTCTAATTTCTGATCTCCTGGAATGTTTTGGTAAACCTCTCA  
GACTACGTCTGATGTACATCCGAAACATGACAGGGATGGCTGCACTTCCAATTGGAAGGA  
ATGTAGATTACGAAACGGCAGGCGAGAGTGCACGAGTGCTCTCCCGGTTGTTCAACATCT  
CATTCTCATGTAACCTTATCTCTCAAATCATTGGGTAGATTCTATCCAATCATGCGAGAG  
ACGCGTATACATGATCGCAAGCCAGATCAGCTGAAAAGGTGATCACTAAAGCTGAAGAAT  
GACAAGAGAGAACTCTTGCAATTCTTGAGACAGATAGTGGTCCACTTCTCAGTGCTTCTG  
ACCAAGAAGCATTGTTGGACCAATGAGCAATGGTAGCTCCTCCTTTAGTGGTGTTCGCGC  
AACTTGCGTGGACAACCATTGAAGGGATAGAGCCAGACGTAGAGATGGGAGATCCAATTG  
AATACATATGAGATAAACTCATTGTAAGAAATTGATTACTCTCCCTGAGTCTGAAGGAA  
TACTTCCTACTCGATCCAGTCATCAACACGCTGGGTGCGGTGCAGCTTACCTGAAATCTC  
TCGTATCGGTGATCCACCGATATAGACTAGGAAAACGGCCTGGAATAGACCGTTTAGTCTC  
CTTTGCCCGCCTCTAGATAAAATACCAATAATAGGTTCAAATCTATTATTGGGGGATGAC  
TAGAGAGCTATTTCGCGCCAAGATGGCGC

>EnmuMV6-KVL-14-117

CGCTGATGCGGGATAGCACTACAGCCCCTCTCTAACGAGATTATCTGTAGGCAAATAGAG  
TACAGGTTTTATACTGCCTGTACCAGTTCAGTGAGGGTCACTTGATGATTACCGGTCTT  
CCGTGATACCTGACGGTATCCACTTACTACCCAAGTATAGCTATTTGCCTCTTAAACAA  
ACAACATATATGAGATAATAAAATAACAAACCTTTACTTGCCGCTCTTATTGAGCTGGATC  
AAGAAGGTCTATTATCCGGATGTCGACGTGAGTCAGTCGGATCTTAACAGATTTGACTCC  
ACAATCCAGAGATGGATTAAGGGGTCTGGTCTGGCGTGGACTGTCTCGAGATTGAAACAA  
TCTCGGAACCTTACTCACCAAACACATCTGTGAAGACCCGGATTTCCATAATCCGGGGATC  
GCAGTGGGGAAGTCAAACCTTACCCCGAGTATTACCTGGCTCACTAAGAGCTCAGATCTCC  
CGAGGTGACCCAAGGGCCATCTCTTTCCGAATCACCTACTGTCTGTAGGGAAGATGTCTG  
TTAGGAGGTACTGAACCAGATACATCTACCATCACTGATAAATGGTCTGGCCAGATACCA  
AAGGAGCTCCAAGACGCTATTCTGACTATTGCAAAGCAATTGGTCAGCTGAACACCGAT  
TTTGAAGATTTCCATTGGACTCTTAAGAAGGGACCCGGAGGGGACACGGCAATACACTCC  
GCAATGGAGGAATTCCGTATCTTACCTTCGAACTTATCGACGCCCAGATAACTCTGGCC  
GGCGGGAAGTTCAGGGATTGCACTGAATGACTTACGTCGAACATGACTAGAGAACTCTA  
GACAAGATCACGCAGTTGTGCGGTGCAAACCAAAGTCCATATTACGGAGAATTGCTACA  
ATTCCTGATAAGGAAATGAAAACAAGGGTTATAGCTAATCTGGATTATTGATCACAGACT  
GCGCTAAAACCTCTCCATAAATAGTCTTATGAGTATACTCAAGAGACTTCCAGCGGACATG  
ACATATAAGCAAGATAAGGCTGCGGCCCACCTCCCCAAGGAGGGTCCATACTTCTCTTAC  
GATTTGTCTGCCGCTACAGATAGGTTCCCGATAGAATTCCAATACCAAGTACTTTCCAGA  
TTAATCGGGAAAGAAAAGGCTGATGCGTGAAAACACATCATGGTTGACTATCCCTTTAGA  
TATAAAGGAAGAGACTACAAGTACGCCACGGGGCAACCCATGGGTGCTTATAGTTCTTGG  
GCCCTATTTGCACTGTGCCATCACATCGTAGTTTATGCTAGTGCCAAGTCAGTCGGTAAA  
CACCGATTCATTGGTTATGCTCTATTAGGTGATGACATCGTCATTGCTGACCGTGAGGTT  
GCTGAAAAGTACCTCGCGATCATGACGGAGCTAGGGGTACAGATTTCTCCAACGAAATCA

CACGTTTCGGCTCACTCTTTTGAGTTCGCCAAACAGTGATATCATAAAGGGAAACAAGTA  
TCCCCATTCCCTCTAGCCGACTCCAAGAGGTAGGGTCAAAGTATCATCTACTTTTCGCC  
TTCCTAGAGGACTTACATCATAAAGGGATAACCCCTTATGAAGATCCGTTTTCAAGGAAA  
TACCTTTTTCAGGCTGTTCCACATTATGGGTATAAAGGGAACAAGGCTCATGAATAATCTT  
AGAAGGAAACTTCTGAGGTTATCCTATGTACCTTCTCCACATGACGATAAACCGACGGTA  
GCCCTTAAGGCTAGATCGTTGGCTAAGCTTTGTGGTATCCCGTTATCCTGTAACACTCC  
GTAGATGCTTATTGCGATGCAATAGGCGACATGGGGATGAGAGCAGTATCAAACCTCCTTA  
GCTAAGGAGGTTGACCGAGCCATGGATGAAACCATGAAGTGATCCATGAAAGTCGAAGAC  
TTAATCATGGAGCACGACCTGCCACTTTGCAGTGACGAGATGTTGCGACAGCTTCCTCTC  
TTCCGAGCCCTTGACAAGATTGTCAAAGACTCAACAAGGGATGTGAAGAAGATCATGAGA  
TCCGACATGCCTTTATCAAGGCATCTGGCAACCCCAAATATTGATATTTGAGGTTACTGT  
CGGAAACTGACGATAACTCCCTATTCAGCTTCTGAGGCTCTCGCCCCAGTAAGGACAAAA  
GAAATACAAGCCATTGGCTTCGTTTCCTTTGTGGATAGGCTCGTCGAGATCTGGGGTAGA  
TCTCACTTGTAACCAGATCTCTCAGGTTAGCAAGTTAAATACCCTGCGAGTTGGGGCGTC  
CTCGAAGAGATATTAGACGTTCCGCGCCATCTTAAACCCCTTACTTTGTAAGGTGGGCTA  
GATGTGCTATCCCGCATCAGCG

>EnmuMV6-KVL-14-118

CGCTGATGCGGGATAGCACTACAGCCCCTCTCTAACGAGATTATCTGTAGGCAAATAAGAG  
TACAGGTTTTATACTGCCTGTACCAGTTCAGTGAGGGTCACTCGATGATTACGGTCTT  
CCGTGATACCTGACGGTATCCAACCTTACTACCCAAGTATAGCTATTTGCCTCTTAAACAA  
ACAACTATCATGAGATAATAAAATAACAAACCTTTACTTGCCGCTCTTATTGAGCTGGATC  
AAGAAGGTCTATTATCCGGATGTGACGTGAGTCAGTCGGATCTTAACAGATTTGACTCC  
ACAATCCAGAAATGGATTAAGGGGTCTGGTCTGGCGTGGACTGTCTCGAGATTGAAACAA  
TCTCGGAACCTTACTACCAAACACATCTGTGAAGACCCGGATTTCCATAATCCGGGGATC  
GCAGTGGGGAAGTCAAACCTTACCCCGAGTATTACCTGGCTCACTAAGAGCTCAGATCTCC  
CGAGGTGACCCAAGGGCCATCTCTTTCGGAATCACCCCTACTGTCTGTAGGGAAGATGTGCG  
TTAGGAGGTACTGAACCAGATACATCTACCATCACTGATAAATGGTCTGGGCAGATACCA  
AAGGAGCTCCAAGACGCTATTCTGACTATTGCAAAGCAATTGGTCAGCTGAACACCGAT  
TTTGAAGACTTCCATTGGACTCTTAAGAAGGGACCCGGAGGGGACACGGCAATACACTCC  
GCAATGGAGGAATTCCGTATCTTACCTTCGAAACTTATCGACGCCAGATAACTCTGGCC  
GGCGGGAAGTTTAGGGATTGCACTGAATGACTTACGTCGAACATGACTAGAGAACTCTA  
GACAAGATCACGCAGTTGTGCGGTGCGAAACCCAAGTCCATATTACGGAGAATTGCTACA  
ATTCCTGATAAGGAAATGAAAACAAGGGTTATAGCTAATCTGGATTATTGATCACAGACT  
GCGCTAAAACCTCTCCATAATAGTCTTATGAGTATACTCAAGAGACTTCCAGCGGACATG  
ACATATAAGCAAGATAAAGCCGCGGCCACCTCCCCAAGGAGGGTCCGTACTTCTCTTAC  
GATTTGTCTGCCGCTACAGATAGGTTCCCGATAGAATTCCAATACCAAGTACTTTCCAGA  
TTAATCGGGAAAGAAAAGGCTGATGCGTGAAAACACATCATGGTTGACTATCCCTTTAGA  
TATAAAGGAAGAGACTACAAGTACGCCACGGGGCAACCCATGGGTGCTTATAGTTCTTGG  
GCCCTATTTGCACTGTGCCATCACATCGTAGTTTATGCTAGTGCCAAGTCAGTCGGTAAA  
CACCGATTCAATTGGTTATGCTCTATTAGGTGATGACATCGTCATTGCTGACCGCGAGGTT  
GCTGAAAAGTACCTCGCGATCATGACGGAGCTAGGGGTACAGATCTCCCCAACGAAATCA  
CACGTTTCGGCTCACTCTTTTGAGTTCGCCAAACAGTGATATCATAAAGGGAAACAAGTA  
TCCCCATTCCCTCTAGCCGACTCCAAGAGGTAGGGTCAAAGTATCATCTACTTTTCGCC  
TTCCTAGAGGACTTACATCATAAAGGGATAACCCCTTATGAAGATCCGTTTTCAAGGAAA

TACCTTTTCAGGCTGTTCCACATTATGGGTATAAAGGGAACAAGGCTCATGAATAATCTT  
AGAAGGAACTTCTAAGGTTATCCTATGTACCTTCTCCACATGACGATAAACCGACGGTA  
GCCCATAAGGCTAGATCGTTGGCTAAGCTTTGTGGTATCCCGTTATCCTGTAACACTCC  
GTAGATGCTTATTGCGATGCAATAGGCGACATGGGGATGAGAGCAGTATCAAACCTCTTA  
GCTAAGGAGGTTGACCGAGCCATGGATGAAACCATGAAGTGATCCATGAAAGTCGAAGAC  
TTAATCATGGAGCACGACCTGCCACTTTGCAGTGACGAGATGTTCGCACAGCTTCCTCTC  
TTCCGAGCCCTTGACAAGATTGTCAAAGACTCAACAAGAGATGTGAAGAAGATCATGAGA  
TCCGACATGCCTTTATCAAGGCATCTGGCAACCCCAAATATTGATATTGAGGTTACTGT  
CGGAAACTGACGATAACTCCCTATTCAGCTTCTGAGGCTCTCGCCCCAGTAAGGACAAAA  
GAAATACAAGCCATTGGCTTCGTTTCTTTGTGGATAGGCTCGTCGAGATCTGGGGTAGA  
TCTCACTTGTAACAGATTTCTCAGGTTAGCAAGTCAAATACCCTGCGAGTTGGGGCGTC  
CTCGAAGAGATATTAGACGTTCCGCGCCATCTTAAACCCTTACTTTGTAAGGTGGGCTA  
GATGTGCTATCCCGCATCAGC

>EnmuMV6-HHdFL130914-1

CGCTGATGCGGGATAGCACTACAGCCCCTCTCTAACGAGATTATCTGTAGGCAATAAGAG  
TACAGGTTTTATACTGCCTGTACCAGTTCAGTGAGGGTCACTCGATGATTACGGTCTT  
CCGTGATACCTGACGGTATCCAACCTTACTACCCAAGTATAGCTATTTGCCTCTTAAACAA  
ACAACATATCATGATAATAAAATAACAAACCTTTACTTGCCGCTCTTATTGAGCTGGATC  
AAGAAGGTCTATTATCCGGATGTCGACGTGAGTCAGTCGGATCTTAACAGATTTGACTCC  
ACAATCCAGAGATGGATTAAGGGGTCTGGTCTGGCGTGGACTGTCTCGAGATTGAAACAA  
TCTCGGAACCTTACTCACCAAACACATCTGTGAAGACCCGGATTTCCATAATCCGGGGATC  
GCAGTGGGGAAGTCAAACCTTACCCCGAGTGTTACCTGGCTCACTAAGAGCTCAGATCTCC  
CGAGGTGACCCAAGGGCCATCTCTTTCGGAATCACCTACTGTCTGTAGGGAAGATGTCC  
TTAGGAGGTACTGAACCAGATACATCTACCATCACTGATAAATGGTCTGGCCAGATACCA  
AAGGAGCTCCAAGACGCTATTCTGACTATTGCAAAGCAATTGGTCAGCTGAACACCGAT  
TTTGAAGACTTCCATTGGACTCTTAAGAAGGGACCCGGAGGGGACACGGCAATACACTCC  
GCAATGGAGGAATTCCGTATCTTACCTTCGAAACTTATCGACGCCCAGATAACTCTGGCC  
GGCGGGAAGTTTAGGGATTGCACTGAATGGCTTACGTCGAACATGACTAGAGAACTCTA  
GACAAGATCACGCAGTTATGCGGTGCAAAACCAAAGTCCATATTACGGAGAATTGCTACA  
ATTCCTGATAAGGAAATGAAAACAAGGTTATAGCTAATCTGGATTATTGATCACAGACT  
GCGCTAAAACCTCTCCATAATAGTCTTATGAGTATACTCAAGAGACTTCCAGCGGACATG  
ACATATAAGCAAGATAAGGCTGCGGCCACCTCCCCAAGGAGGGTCCATACTTTTCTTAC  
GATTTGTCTGCCGCTACAGATAGGTTCCCGATAGAATTCCAATACCAAGTACTTTCCAGA  
TTAATCGGGAAAGAAAAGGCTGATGCGTGAAAACACATCATGGTTGACTATCCCTTTAGA  
TATAAAGGAAGAGACTACAAGTACGCCACGGGGCAACCCATGGGTGCTTATAGTTCTTGG  
GCCCTATTTGCACTGTGCCATCACATCGTAGTTTATGCTAGTGCCAAGTCTGTCCGTAAA  
CACCGATTCAATTGGTTATGCTCTATTAGGTGATGACATCGTCATTGCTGACCGTGAGGTT  
GCTGAAAAGTACCTCGCGATCATGACGGAGCTAGGGGTACAGATCTCCCCAACGAAATCA  
CACGTTTCGGCTCACTCTTTTGAGTTCGCCAAACAGTGATATCATAAAGGGAAACAAGTA  
TCCCCATTCCCTCTAGCCGACTCCAAGAGGTAGGGTCAAAGTATCATCTACTTTTCGCC  
TTCCTAGAGGACTTACATCATAAAGGGATAACCCCTTATGAAGATCCGTTTTCAAGGAAA  
TACCTTTTCAGGCTGTTCCACATTATGGGTATAAAGGGAACAAGGCTCATGAATAATCTT  
AGAAGGAACTCCTAAGGTTATCCTATGTACCTTCTCCACATGACGATAAACCGACGGTA  
GCCCTTAAGGCTAAATCGTTGGCTAAGCTTTGTGGTATCCCGTTATCCTGTAACACTCC



GTAGATGCTTATTGCGATGCAATAGGCGACATGGGGATGAGAGCAGTATCAAACCTCCTTA  
GCTAAGGAGGTTGACCGAGCCATGGATGAAACCATGAAGTGATCCATGAAAGTCGAAGAC  
TTAATCATGGAGCACGACCTGCCACTTTGCAGTGACGAGATGTTTCGCACAGCTTCCTCTC  
TTCCGAGCCCTTGACAAGATTGTCAAAGACTCAACAAGAGATGTGAAGAAGATCATGAGA  
TCCGACATGCCTTTATCAAGGCATCTGGCAACCCCAAATATTGATATTGAGGTTACTGT  
CGGAAACTGACGATAACTCCCTATTCAGCTTCTGAGGCTCTCGCCCCAGTAAGGACAAAA  
GAAATACAAGCCATTGGCTTCGTTTCCTTTGTGGATAGGCTCGTCGAGATCTGGGGTAGA  
TCTCACTTGTAACCAGATTTCTCAGGTTAGCAAGTTAAATACCCTGCGAGTTGGGGCGTC  
CTCGAAGAGATATTAGACGTTCCGCGCCATCTTAAACCCTTACTTTGTAAGGTGGGCTA  
GATGTGCTATCCCGCATCAGCG

>EnmuMV6-Berkeley

CGCTGATGCGGGATAGCTCTACAGCCCCTCTCTAACGAGATTATCTGTAGGCAAATAAGAG  
TACAGGTTTTATACTGCCTGTACCAGTTCAGTGAGGGGTCACCAGATGATTACGGTCTT  
CCGTGATACCTGACGGTATCCGACTTACTACCCAAGTATAGCCATTTGCCTCTTAAACAA  
ATAACTATCATGAGATAATAAAATAACAAACCTTAACTTGCCGCTCTTATTGAGCTGGATC  
AAGAAGGTCTATTATCCGGATGTCGACGTGAGTCAGTCGGATCTTAACAGATTTGACTCC  
ACAATCCAGAGGTGGATTAAGGGGTCTGGTCTGGCGTGGACTGTCTCGAGATTGAAACAA  
TCTCGAACTTACTCACCAAACACATCTGTGAAGACCCGGATTTCCATAATCCGGGGATC  
GCAGTGGGGAAGTCTAACTTACCCCGAGTGTTACCCGGCTCGTTGAGAGCTCAGATCTCC  
AAAGGTGACCCTAGGGCCATCTCTTTCGGAATCACCTACTTTCTGTAGGTAAGATGTCTG  
TTAGGAGGTACTGAACCAGATACATCTACCATCACTGATAAATGATCTGGCCGGATACCA  
AAGGAGCTCCAAGACGCTATTCTGACTATTGCACTGCAATTGGTCAGCTGAATACCGAT  
TTTGAAGATTTCCATTGGACCCTTAAGAAAGGACCCGGAGGGGATACAGCGATTCACTCC  
GCGATGGAGGAATTCCGTATCCTGTCTTCGGAACCTGATCGAGGCACAGATTACTCTGGCC  
GGCGATAAGTTTGAGGATTGCACAGAATGACTAACGTGAAACATGACTAGAGAACTCTA  
GACAAGATCACCCAGTTATGCGGTGCTAAACCTAAGTCCGTATTACGGAGAATTGCTACA  
ATTCCTGATAAGGAAATGAAGACAAGGGTAATAGCCAATCTGGATTATTGATCCCAGACT  
GCACTAAAACCACTCCATAATAGTCTTATGAGTATACTCAAGAGACTTCCAGCGGACATG  
ACTTATAAGCAAGACAAGGCTGCGGATCACCTCCCTAAAGAGGGCCCGTACTTCTCTTAC  
GATTTGTCTGCCGCTACAGATAGGTTCCCGATAGAATTCCAATACCAAGTACTTTCCAGA  
TTAATCGGGAAAGAAAAGGCTGATGCGTGAAAACACATCATGGTGGACTATCCCTTTAGA  
TATAAAGGAAGGGACTATAGGTACGCCACGGGACAACCCATGGGTGCGTATAGTTCTTGG  
GCCCTATTTGCACTGTGTATCATCATCGTAGTCTACGCAAGTGCCAAATCGGTGCGCAAA  
CGCCGATTCATTGGTTACGCTCTACTTGGTGATGACATCGTCATTGCCGATCGCGAGGTG  
GCTGAAAAGTACCTCGAGATCATGACAGAGCTAGGGGTACAAATCTCCCCTACGAAATCA  
CACGTTTCAGCTCACTCATTTGAGTTCGCTAAACAGTGATATCATAAAGGGAAACAGGTA  
TCCCCATTCCCTATGGCCGGACTCCAAGAGGTAGGGTCAAAGTATCATCTACTTTTCGCC  
TTCCTAGAGGACTTACATCACAAGGGTATAAACCCTTATGAAGATCCGTTTTCAAGGAAA  
TACCTTTTCAGGTTGTTCCACATTATGGGTATAAAGGGAATAAGGCTTATGAATAATCTA  
AGAAGGAACTTCTCAGGTTATCTTATATACCTTCTCCGCATGACGATAAACCGACGATA  
GCCATTAAGGCTAGATCGCTGGCTAAACTCTGTGGTATCCCGTTATCCTGTAAGTACTCT  
GTAGATGCTTATTGCGATGCAATAGGCGACATGGGGATGAGAGCAGTATCAAACCTCCTTA  
GCTAAGGAGGTTGACCGAGCCATGGATGAAACCATGAAATGGACCATGAAAGTCGAAGAC  
TTAATCATGGAACATGATCTGCCACTTTGCAGTGACGAGATGTTTCGCACAGCTTCCCCTC

TTCAGAGCTCTTGACAAAATTGTCAAAGACTCTACAAGAGATGTGAAGAAGATCATGAGA  
TCCGATATGCCTTTAACAAGGCACCTGGCAACCCCAAATATTGATATTTGAGGTTACTGT  
CGGAAACTGACAATAACTCCCTATTCAGCTTCTGAGGCTCTCGCCCCAGTAAGGACAAAA  
GAAATTCAGCCATTGGCTTTGTTTTGTTTGTGGATAGGCTCGTCGAGATCTGGGGTAGA  
TCTCACTTGTAACCAGATTTCTCGGGTTAGCAAGTAAAATACCCTGCGAGTTGGGGCGTC  
CTCGAAGAGATATTAGACGTTCCGCGCCATCTTAAACCCTTACTCTGTAAGGTGGGCTA  
GATGTGCTATCCCGCATCAGCG

>EnmuMV7-KVL-14-117

CGGGGGCAACACTTACTTTCTGTAAGTCACCTTGTGTGAGTGCCCAACTTTACTTTCTCC  
ACCCTAAGAACTAAAATCACACACCGATCCCCAAAGGGGAAGGATATCGGTTAAAATAT  
CCCCACCATTAAAATAAACTTAAACATGAAAATAACAAAATTTAACATATTTAAGGTTA  
CTCTAAAGGTGGTAACCTGGATATTTCAAGAGTTCAATCTTAAAATATCTGGCCGGATGA  
GTGATTATATAGACCTAATCCTGAGACTCGATCGATTATTATATAATCGAGGAGCGCTAG  
AAACCCTTAAATATATTAAGGGTACTAGAACTGCCTATTTGGCTTACTTATCAGGTAAGC  
CAATACGAGTTAAGGGAGTAAGGACAACGAAGGATGGGATCCCTGTTATCCTAGGTGACT  
TTGTTCCCAAATCCGTAAAGGACCAACTCCAGCTATGCTGCAATTGATCAATACGATTT  
TGTTCTGTACAAGGGCACTGAAGCTTGAAGAACTCCTGATTTCTCACCTATTATTAATC  
CCCCAAAAGGGATCCGATTAATATAGGAGAATTCGTGGACGACTTCTGGCGGGATATGG  
GATACCACCGACAGGCTCGTACGAATCCTAAGAGTCTTGACTTCCGTAAGTTTCACTTAA  
CGACAAAATCTGGCCCGAATGGGACAGCTAATGCGTTGTGAACCTCTCTCAATGACCTTA  
AGGCGTTGTCTGAACAACAATAACCGATATCGGTATCATTGGAGGAGAGAACTTACGGA  
ACAAGATAAGTACTCTCAAAGAGGGACTTTCTAAGATTCCTGAGTTATCCTACTTTATAG  
ATACCTCTGCAGGTACCTATACTAGAAGGTTAACCAGTTTCCCTGATAAAGAACTAAAAG  
TTCGAGTAATCGCCGTTGGCGACTACTTTAGTCAAGCAGCGTTAAAACCGCTGCATGATT  
ATTTATTCAGGGTTCTTAAGAAAATTCCTCAAGATTGTACTTTCAACCAAGGTGGGTTCT  
GAGATAAAATTAAGATCAGGAATACTATGCAAGTATCGACTTAACAGCCGCTACTGATA  
GATTCCTATCTCAACAATATCTCAGGTGCTACTAGGGAGACTCCCAGAATCTTACGTGA  
ATGCATGGAGCCGACTTATGGTCCGTACCCCATTTATTCATGAAGGACAGGAAATAAATT  
ACTCTGTGCGAAACCCTATGGGTTTCTACTCTTCATGAGCATCCTTTGCAGTAGCACACC  
ACTATGTGGTATACTATTGCTGTAAGAACTAGGTATCCCTTGGAACCTTTAAAATATT  
GTCTCCTTGGAGATGATATTGTTATATGTGATCCAAAAGTAGCAGCCCTGTACAAGGAAA  
CTATTTCAGGGTTGGGTGTTGAATTCTCAGAAGAGAAAACAATCACCTCACCACACTTAG  
TAGAGTTTGCCAAAAGGCTAATCTACAAAGGTAAGTAAATATCACCTTTCCCAATCTCAG  
CTTTAGGTGAGTTAGCTAGTAAATATTATTTACTAACTAATTATTCTTAGAGCTTGAGA  
AGAAAGGTTGGGTTTCACTTGGCGGTGCGCCATCAGCAGTTGAATCTTTCCACAAGATCG  
TTCTTAACTGATCTACCGTGCGAGCACGAGAGATCGAAGTTAAGGCATCTATTTGCGAAC  
GGGTTATGAAGATAGCCCGAGGGGCGGAGAATGCTGGGACTCTCTTAACAGAGTGTTTCA  
GGAACTCGGATACCCATTTGTTCTTAGCGACTTTGTTGCCAGAAATGTTCTGGAAAACA  
TAGTTGTTGAGAACTTCGCAAATCTAATCCTGCTTCTCATGACCCAGAAAGGGACAAGA  
AGAAGAAAAGACCATGTGTGGGTCTCGGCATACTTGCTGAGAACCTTACATGTCTTTTAA  
CAGGTTTAGATGAGGAAAGATTTTCGCTAGGATTGACTTAATATCGACATTACCTCACT  
TAAATGCCTATGGGCAGATAAGTGAAATGTATATCGAGATTAATAAGAAAGCCCGAAAGA  
TTAGCACCAAAATGGTGCGGAATGACCATTGTTATTTAAAACAATGTGTATTCCATGGG

ACGATACCATCTTTACGATGAGATCATCTCATTTAATCGCTAAGGGCTCTTCTAGAGTCG  
TCAAAGATCTTCAGAATAGGGCAGAGCTGTAAAGCTTCTACCCTCCTGAAGAGCTCCTTC  
GTGAGGATCCTAATTTCTTAAATCACTCTAAAGCCTAGCTCGGATTCGGGTCAGCGCTG  
ATAAGCTGATTCCGCTCGAG

>EnmuMV7-KVL-14-118

CCCGTAGTTAATTCTACGGGGGGCAACACTTACTTTTCGTAAGTCACCTTGTGTGAGTGCC  
CAACTTTACTTTCTCCACCCTAAGAACTAAAATCACACACCGATCCCCAAAGGGGAAGG  
ATATCGGTTAAATATCCCCCACCATTAAATAAACTTAAACATGAAAAATAACAAAATTT  
AACATATTTAAGGTTACTCTAAAGGTGGTAACCTGGATATTTCAAGAGTTCAATCTTAA  
ATATCTGGCCGGATGAGTGATTATATAGACCTAATCCTGAGACTCGATCGATTATTATAT  
AATCGAGGAGCGCTAGAGACCCTTAAATATATTAAGGGTACTAGAACTGCCTATTTGGCT  
TACTTATCAGGTAAGCCAATACGAGTTAAGGGAGTAAGGACAACGAAGGATGGGATCCCT  
GTTATCCTAGGTGACTTTGTTCCCAAAATCCGTAAAGGACCAACTCCAGCTATGCTGCAA  
TTGATCAATACGATTTTGTCTGTACAAGGGCACTAAAGCTTGAAGAAGCTCCTGATTTT  
TCACCTATTATTAATCCCCCAAAAGGGATCCGATTAATATAGGAGAATTCGTGGACGAC  
TTCTGGCGGGATATGGGATACCACCGACAGGCTCGTACGAATCCTAAGAGTCTTGACTTC  
CGTAAGTTTCACTTAACGACAAAATCTGGCCCCGAACGGGACAGCTAATGCGTTGTGAACC  
TCTCTCAATGACCTTAAGGCGTTGTCTGAACAACAATAACCGATATCGGTATCATTGGA  
GGAGAGAACTTACGGAACAAGATAAGTACTCTCAAAGAGGGACTTTCTAAGATTCCTGAG  
TTAGCCTACTTTATAGATACCTCTGCAGGTACCTATACTAGAAGGTTAACCAGTTTCCCT  
GATAAAGAACTAAAAGTTTCGAGTAATCGCCGTTGGCGACTACTTTAGTCAGGCAGCATT  
AAACCGCTGCATGATTATTTATTCAGGGTTCTTAAGAAAATTCCTCAAGATTGTACTTTC  
AACCAAGGTGGGTTCTGAGATAAAATTAAGATCAGGAATACTATGCAAGTATCGACTTA  
ACAGCCGCTACTGATAGATTCCCTATCTCAACAATATCTCAGGTGCTACTAGGGAGACTC  
CCGGAATCTTACGTGAATGCATGGAGCCGACTTATGGTCGGTACCCCATTTATTCATGAA  
GGACAGGAAATAAATTACTCTGTGCGAAACCTATGGGTTTCTACTCTTCATGAGCATCC  
TTTGAGTAGCACACCACTATGTGGTATACTATTGCTGTAAGAACTGGGTATCCCTTGG  
AAAACTTTAAATATTGTCTCCTTGGAGACGATATTGTTATATGTGATCCAAAAGTAGCA  
GCCCTGTACAAGGAACTATTTACGGGTTGGGTGTTGAATTCTCAGAAGAGAAAACAATC  
ACCTCACCACACTTAGTAGAGTTCGCCAAAAGGCTAATCTACAAAGGTAAGTAAATATCA  
CCTTTCCCAATCTCAGCTTTAGGTGAGCTAGCTAGTAAATATTATTTACTAACTAATTA  
TTCTTAGAGCTTGAGAAGAAAGGTTGGGTTTCACTTGGCGGTGCGCCATCAGCAGTTGAA  
TCTTTCCACAAGATCGTTCTTAAGTATCTACCGTGCGAGCACGAGAGATCGAAGTTAAG  
GCATCTATTTGCGAACGGGTTATGAAGATAGCCCGAGGGGCGAGAATGCTGGGACTCTC  
TTAACAGAGTGTTTCAGGAACTCGGATACCCATTTGTTCTTAGTGACTTTGTTGCCAGA  
AATGTTCTGGAAAACATAGTCGTTGAGAACTTCGCAAAATCTAATCCTGCTTCTCATGAC  
CCAGAAAGGGACAAGAAGAAGAAAGACCATGTGTGGGTCTCGGCATACTTGCTGAGAAC  
CTTACATGTCTTTTAACAGGTTTAGATGAGGAAAGATTTTCGCTAGGATTCGACTTAATA  
TCGACATTACCTCACTTAAATGCCTATGGGCAGATAAGTGAATGTATATCGAGATTAAT  
AAGAAAGCCCGAAAGATTAGCACCACAAATGGTGCGGAATGACCATTGTTATTTAAACA  
ATGTGTATTCCATGAGACGATACCATCTTTACGATGAGATCATCTCATTTAATCGCTAAG  
GGCTCTTCTAGAGTCGTCAAAGATCTTCAGAATAGGGCAGAGCTGTAAAGCTTCTACCCT  
CCTGAAGAGCTCCTTCGTGAGGATCCTAATTTCTTAAATCACTCTAAAGCCTAGCTCGG  
ATTCGGGTCAGCGCTGATAAGCTGATTCCGCTCGAGACCCGTGTGAAGTCCTTTCTTGC

GAAAGGCGGGGACACGGGTGTATACCCC

>EnmuMV7-HHdFL130914-1

CCCGTAGTTAATTCTACGGGGGGCAACACTTACTTTTCGTAAGTCACCTTGTGTGAGTGCC  
CAACTTTACTTTCTCCACCCTAAGAACTAAAATCACACACCGATCCCCAAAGGGGAAGG  
ATATCGGTTAAAATATCCCCACCATTAAAATAAACTTAAACATGAAAAATAACAAAATTT  
AACATATTTAAGGTTACTCTAAAGGTGGTAACCTGGATATTTCAAGAGTTCAATCTTAAA  
ATATCTGGCCGGATGAGTGATTATATAGACCTAATCCTGAGACTCGATCGATTATTATAT  
AATCGAGGAGCGCTAGAAACCCTTAAATATATTAAGGGTACTAGAACTGCCTATTTGGCT  
TACTTATCAGGTAAGCCAATACGAGTTAAGGGAGTAAGGACAACGAAGGATGGGATCCCT  
GTTATCCTAGGTGACTTTGTTCCCAAAATCCGTAAAGGACCAACTCCAGCTATGCTGCAA  
TTGATCAATACGATTTTGTCTGTACAAGGGCACTGAAGCTTGGAAGAACTCCTGATTTT  
TCACCTATTATTAATCCCCCAAAGGGATCCGATTAATATAGGAGAATTCGTGGACGAC  
TTCTGGCGGGATATGGGATACCACCGACAGGCTCGTACGAATCCTAAGAGTCTTGACTTC  
CGTAAGTTTCACCTAACGACAAAATCTGGCCCGAATGGGACAGCTAATGCGTTGTGAACC  
TCTCTCAATGACCTTAAGGCGTTGTCTGAACAACAATAACCGATATCGGTATCATTGGA  
GGAGAGAACTTACGGAACAAGATAAGTACTCTCAAAGAGGGACTTTCTAAGATTCCTGAG  
TTATCCTACTTTATAGATACCTCTGCAGGTACCTATACTAGAAGGTTAACCAGTTTCCCT  
GATAAAGAACTAAAAGTTTCGAGTAATCGCCGTTGGCGATTACTTTAGTCAGGCAGCGTTA  
AAACCGCTGCATGATTATTTATTCAGGGTCTTAAGAAAATTCCTCAAGATTGTACTTTC  
AACCAAGGTGGGTTCTGAGATAAAATTAAGATCAGGAATACTATGCAAGTATCGACTTA  
ACAGCCGCTACTGATAGATTCCCTATCTCAACAATATCTCAGGTGCTACTAGGGAGACTC  
CCGGAATCTTACGTGAATGCATGGAGCCGACTTATGGTCGGTACCCCATTTATTCATGAA  
GGACAGGAAATAAATTACTCTGTGGAACCCCTATGGGTTTCTACTCTTCATGAGCATCC  
TTTGAGTAGCACACCACTATGTGGTATACTATTGCTGTAAGAACTGGGTATCCCTTGG  
AAAACTTTAAAATATTGTCTCCTTGGAGATGATATTGTTATATGTGATCCAAAAGTAGCA  
GCCCTGTACAAGGAACTATTTACGGGTTGGGTGTTGAGTTCTCAGAAGAGAAAACAATC  
ACCTCACCACTTAGTAGAATTCGCCAAAAGGCTAATCTACAAAGGTAAGTAAATATCA  
CCTTTCCCAATCTCAGCTTTAGGTGAGCTAGCTAGTAAATATTATTTACTAACTAACTTA  
TTCTTAGAGCTTGAGAAGAAAGGTTGGGTTTCACTTGGCGGTGCGCCATCAGCAGTTGAA  
TCTTTCCACAAGATCGTTCTTAACGTATCTACCGTGCGAGCACGAGAGATTGAAGTTAAG  
GCATCTATTTGCGAACGGGTTATGAAGATAGCCCGAGGGGCGAGAATGCTGGGACTCTC  
TTAACAGAGTGTTTCAGGAACTCGGATACCCATTTGTTCTTAGCGACTTTGTTGCCAGA  
AATGTTCTGGAAAACATAGTTGTTGAGAACTTCGCAAAATCTAATCCTGCTTCTCATGAC  
CCAGAAAGGGACAAGAAGAAGAAAAGACCATGTGTGGGTCTCGGCATACTTGCTGAGAAC  
CTTACATGTCTTTTAACAGGTTTAGATGAGGAAAGATTTTCGCTAGGATTCGACTTAATA  
TCGACATTACCTCACTTAAATGCCTATGGGCAGATAAGTGAAATGTATATCGAGATTAAT  
AAGAAAGCCCGAAAGATTAGCACCAACAATGGTGCGGAATGACCATTGTTATTTAAAACA  
ATGTGTATTCCATGAGACGATACCATCTTTACGATGAGATCATCTCATTTAATCGCTAAG  
GGCTCTTCTAGAGTCGTCAAAGATCTTCAGAAATAGGGCAGAGCTGTTAAGCTTCTACCT  
CCTGAAGAGCTCCTTCGTGAGGATCCTAATTTCTTAAATCACTCTAAAGCCTAGCTCGG  
ATTCGGGTCAGCGCTGATAAGCTGATTCCGCTCGAGACCCGTGTGAAGTCCTTTCTTGC  
GAAAGGCGGGGACACGGGTGTATACCCCCTAGGAATTAACCTA

>EnmuMV7-Berkeley

CCCGTAGTTAATTCTACGGGGGGCAACACTTACTTTTCGTAAGTCACCTTGTGTGAGTGCC

CAACCTTTACTTCCTTCACCCTAAGGAACTAAAATCACACACCGATCCCCAGAGGGGAAG  
GATATCGGT**TAAA**ATATCCCCCACCATAAAATAAACTTAAAC**ATG**AAAAATAACAAAATTT  
AACATATTTAAGGTTACTCTAAAGGTGGTAACCTGGATATTTCAAGAGTTCAATCTTAAA  
ATATCTGGCCGGATGAGTGATTACATAGACCTAATTCTGAGACTCGATCGATTATTGTAT  
AATCGAGGAGCGCTAGAAACCTTAAATATATTAAGGGAAGTAACTGCCTACTTGGCT  
TACTTATCAGGTAAGCCGGTACGAGTTAAGGGAGTAAGGACAACGAAGGATGGGATCCCT  
GTTATCCTAGGTGACTTTGTTCCCAAATCCGTAAAGGACCAACTCCAGCTATGCTGCAA  
TTGATCAATACGATTTTGTCTGTACAAGGGCACTAAAGCTTGAAGAAGTCTGATTTT  
TCACCTATTATTAATCCCCCAAAGGGATCCGATTAATATAGGAGAATTCGTGGACGAC  
TTCTGGCGGGATATGGGATACCACCGACAGGCTCGTACGAATCCTAAGAGTCTTGATTTT  
CGTAAGTTTCACTTGACGACAAAATCTGGCCCTAACGGGACAGCTAATGCGCTGTGAACC  
TCTCTCAATGACCTTAAGGCGTTGTCTGAACAACAATAACCGATATCGGTATCATTGGA  
GGAGAGAAGTTACGGAACAAGATAAGTGCTCTCAAAGAGGGACTTTCTAAGATTCCTGAG  
TTATCCTACTTTATAGATACCTCTCCAGGTATCTATACTAGAAGAATAACCGATTTCCCT  
GATAAAGAAGTAAAGTTCCGGTAATCGCCGTTGGCGATTACTTTAGTCAAGCAGCATTAA  
AAACCGCTGCATGATTATTTATTTAGGGTTCTTAAGAAAATTCCTCAAGATTGTACTTTT  
AACCAAGGTGCTTTCTGAGATAAAATTAAGATCAGGAATACTATGCTAGTATCGACTTA  
ACAGCCGCTACTGATAGATTCCCTATCTCAACAATATCTCAGGTGCTACTAGGGAGACTC  
CCAGAATCTTACGTAAATGCCTGGAGCCGACTTATGGTCGGGACTCCATTTACTTATGAA  
GGACAGGAAATAAATTACGCTGTGCGAAACCCCTATGGGTTTCTACTCTTCATGAGCATCA  
TTTGCAGTAGCTCACCCTATGTGGTTTACTATTGCTGTAAGAACTAGGTATCCCTTGG  
AAAACATTAAATATTGTCTCTTA**GGAGATGAT**ATTGTTATATGTGATCCAAAAGTAGCA  
GCCCTGTACAAGGAAACAATTTAGGGTTAGGTGTTGAATTCTCAGAAGAGAAGACAATT  
ACCTCACACACCTTGTAGAATTCGCCAAAAGGCTCATCTACAAAGGTAAGTAAATATCA  
CCTTTCCCAATCTCAGCTTTAGGTGAGTTAGCTAGTAAATATTATTTACTAACTAATTA  
TTCTTAGAGCTTGAGAAGAAAGGTTGAGTTTCACTTGGCGGTGCGCCATCAGCAGTTGAA  
TCTTTCCATAAGATTGTTCTTAAGTATCAACCGTGCGAGCACGGGAGATTGAAGTTAAG  
GCATCTATTTGCGAACGGGTTATGAAAATAGCCCGAGGGGCGAGAATGCTGGTACTCTT  
TTAACAGAGTGTTTCAGGAACTCGGATACCCATTTGTTCTAAGTGACTTTGTTGCCAGA  
AATGTTCTGGAAAACATCGTCGTAGAGAACTTCGCAAAATCTAATCCTGCTTCTCATGAC  
CCCGAAAGGGATAAGAAGAAGAAAAGACCATGCGTGGGTCTCGGCATACTTGCTGAGAAC  
CTCACATGTCTTTTATCAGGTTTAGATGAGGAAAGATTTTCTCTAGGATTCGACTTAATC  
TCGACATTACCTCACTTAAATGCCTATGGGCAAATAAGTGAAATGTATATCGAGATTAAT  
AAGAAAGCCCGAAAGATTAGCACCAAAATGGTGCGGAATGGCCATTGTTATTTAAACA  
ATGTGTATTCCATGGGACGATACCATCTTCAGATGAGATCATCTCATTTAATCGCTAAG  
GGCTCTTCTAGAGTCGTCAAAGATCTTCAGAATAGGGCAGAGCTATTAAGCTTCTACCCT  
CCTGAAGAGCTCCTTCGAGAGGATCCTAATTTCTTAAATCACTC**TAA**AGCCTAGCTCGG  
ATTCGGGTCAGCGCTGATAAGCTGATTCCGCTCGAGACCCGTGTCAAAGTCCTTTCTCTC  
GAAAGGCGGGGACACGGGTGTATACCCCTAGGAATTAACCTA

>EnmuMV8-Berkeley

GGCGATCTAATCGATCGCCATACTTTATCTCTGGACTCAGGTTCTTTCCTGGAACCTAAA  
TGGAGATAAGGATGCTTATAAGCCCGGAATGGGCTATAAGACATCGACCTTTGGGTGGT  
GAGAGGGAGTAGGAGCGATCCTACAGCACCATGGGCGTCATTCTGTTTGCTAATTAGGTA

CTCTAAAAGGTGGAATTCCTTTTACAATGCGGAAGGCTAATACCCTAACCCGTTGGACAA  
CGAGTTAAGACACTTAGCTGCGGACCACTGCCCTAAACCCCCCGCAAATCAAAATATT  
ACTAATAAAATAAAACAGTTTCTTGTCATTCTAAATGACTAAGAGAATGTAGAATTTTA  
AGAGTAGATTCTGACTTGGGGAAGGCATTAGATGAGCACTTTAGCATTATCATAGCGCGA  
TGGATATCCAGTAAAGGACAACCTAGAGACAATCAATAGACTTAAAAATCTACGGGTTATG  
CTCTATGCTTTCCTGTCTGGACGTCCTGTTCCGATGGTTGGGTATTCTCAGTATAAAAAAT  
GGATTACCTAGAGCTTTTGCTCCAGCTTATTCACTTTTATGTGAGAAAGACCCTCACACA  
GTTAGATACATCTTATCACTTTTACAAGTGAGCAGATGCATCCCTGCGTGGAAGAAACCA  
GACCTTAGGACAATAACAGATCCAGGGAAGGATGTACCGCAAGTTCCTTTTACAAGAATTT  
GCTTCCATCGTTCCTAGTCTGTTAGAGACCTTTGGTAATGATATCAATCAACCCCTTACT  
TGGGAACGTCTCCATGTGCTACAACGATGGGACCGTCTGGGCCCTCTATGTTACAATCG  
GCAACTCTCATTCCAAAAGTCCTCAAGAGGTTTAAACACCTGTTTGGGGCTTTAGGAGCT  
GAGGAATTGCTTAAGTACATGGAGAGCATACCTGAGTCTTTCTCAAAACATTGGGAAAGT  
CTATATCCTCAGAAACACAGTGATGTGTTAAGGAGGTGTCGACCGTTCCTGATGTAGAT  
GGAAAGACCAGATTAATAGCGATTCTAGACTATTGGTCACAATCAATCCTGAAAGTCTAT  
CACAAGGACCTAATGTCCTCATTGATGAGAATTCAGAAAATTGATATGACCTTTGGTCAA  
GGAATTGCCCCATTTCGGTCTGAAGACCAAAAGTACTATAGCTTTGACCTAACTGCCGCT  
ACCGATCGTTTTCCAGTTGCAATAACTGAAATAATGATGGCTGCGAAGTATGGACAAGAA  
GCTGCTAGTGCTTGAAAGGAAATCATGACAGGTGAGAAGTTCCATTGGAAGGACAAGGTT  
CTTAAATACAACCGAGGCCAACCAATGGGAGCTTACTCGTCATGGGCTTCTTTCAGTCTT  
AATCATCACATGGTTGTCCAGTGATCTGCATTAAGGGCGGGAGTGGAACCTCCTTTCCTA  
GATTACAGACTACTAGGTGATCGTAATACGGAATGACGCTGTTGCGAATTCATAC  
CTCAAATTGATGGAACATCTAGGAGTCGAAATCTCCTCAGCTAAACTCTAATAAGTGAA  
AACTCATTTGAGTTCGCTAAAAGATTTTGGCTCAATGGTGAAGAAGTTACAGGATACCCA  
ATTGCTGGGCTCCTGAACACCTTTACCAGATGATCTGAATTTCTTCAGGTCACTAGAGAA  
GCATCAAGAAGAGGGTATGATTCCCTCATCACTATTCCCGGAAGGAAGTTTCGAGATCTG  
TTTACCTCTCTACACTTTGCCGATCCATGTAAGAAAACGAAGGTATTAACCTTCGCGTTCT  
TACAGTGAAAGACTAGTTAGAAAGATGATCAGTTTAAATTGATTATGGGAGAAAGGGCG  
GACATCGAGCAAACAGTTAAGTTTGCTCAAATCTGATCCTTCAACCATAGCTGTAATATG  
AGTTTAAAGACTCTACGACTTATCATCATAGAGTCATTAGCTCAAATAAAAGCAAATCAA  
CTTCTCGATTCTTGTAAGAACTCAGGTTAAAACCATTAATGGTTTTATAACTAAAGTCAAA  
CAAGGACTTCCTAGTGATATAGAGATCCCCTTAACCGAGGTACCGCTGATAAAGGCCTTA  
ATGGTCAATTTCAGTGATATGCAAGGTCAAATGGAAGATTTTCAAGAGTTGAGTAAATCC  
GTTTCACGGGATAATACTGAACCCTTTGAGAAAATTCTATTGAGGAATTGTTGATACCA  
GAAATCAATCCGGAAATCTTAGACTCCTCAAGGAGGGCTCTTCGAATTGCGACAACCTGAT  
AAGCAAATGCTCATCAAGGGATGTGTAATCCTCCGTAATACTTCACAAGCTATTACTGAG  
GAATTATCCAACCCTAATGTGCAACCCGACGAAGAAGACTATCACTAGTTCTACTTCTCC  
CAATTGCTAAAACACATATTCGTATGTGAGGTCCGGCAATTGAGTATGGCGCTCGATCAG  
AGCGCCTGGACCCCTCCCG
