# Supplementary material for: Mitovirus and Mitochondrial Coding Sequences from Basal Fungus Entomophthora muscae
Source: MDPI journal article supplement (doi:10.3390/v11040351), 2019-04-17
Supplement: s1 [file s1]

## ***E. muscae* Mitochondrial Coding Sequences**

Terminal sequences of each assembly trimmed back to the proposed ORF

Red shading: first in-frame AUG codon and downstream stop codon

Orange shading: proposed alternative start codon

Gray shading: UGA(Trp) codons

Cyan shading: mismatches relative to the consensus sequence

N residues (cyan lettering) were inserted to fill gaps or truncations relative to the conserved sequences of other strains.

>atp6-KVL-14-117

**ATG**TTATTGTTTAGAAATCCTTTAGAACAATTTATGATTAACGAGTTATTAACGATATTA  
TTCCCTTTCTGGGAAGTGTCATTAACAAATATAGGTTTATATTTAATAATGAGTTTAGTA  
CTAATAGTAATAATATCACAAATCATCCTCGGCTCGACGGGGGTGTGCCGATAATAGGG  
AATAAAAGTATATTAATAAAACAATCAATATATGATACAGTGCATAAGATAGTAAAAGAT  
CAGATAGGTATATCACATGAAATAAATTTACCTTTTTTATACACATTATTTATATTAGTA  
TTGACATTAAATTTAATTGGAATTATTCCTTATAATTATAGTACAACCTCGCATCTCGTT  
TTAACATTAAGTATGAGTGTATCAATATTAATAGGAGTGACAGTAATGGGAGTAAACCGA  
CATAAATTAGTATTTTTTTAGTCTACTAATCCCTGGGGGTACTCCGTTAGGTCTGGTACCT  
CTATTAGTAATAATAGAAACAATATCTTATCTGGCTAGAGCTATTAGCTTAGGAGTAAGA  
TTGGGTGCAAATATGATAGCAGGTCATGTTTTATTAAAAATCTTAGCAGGATTAATCTTG  
AAAATAATGAAAACCTTCGTTAATAACCGGCTTAATAATAGGATGCCTGCCTATGTTTATC  
TTTACTTTATTAGTAGGATTAGAATTAGGTATAAGTGTATTACAAGGGATAGTATTTCTC  
ATTTTAACTTCATCTTATATAAAAGATGCTATTGCTTTACAT**TAG**

>atp6-KVL-14-118

**ATG**TTATTGTTTAGAAATCCTTTAGAACAATTTATGATTAACGAGTTATTAACGATATTA  
TTCCCTTTCTGGGAAGTGTCATTAACAAATATAGGTTTATATTTAATAATGAGTTTAGTA  
CTAATAGTAATAATATCACAAATCATCCTCGGCTCGACGGGGGTGTGCCGATAATAGGG  
AATAAAAGTATATTAATAAAACAATCAATATATGATACAGTGCATAAGATAGTAAAAGAT  
CAGATAGGTATATCACATGAAATAAATTTACCTTTTTTATACACATTATTTATATTAGTA  
TTGACATTAAATTTAATTGGAATTATTCCTTATAATTATAGTACAACCTCGCATCTCGTT  
TTAACATTAAGTATGAGTGTATCAATATTAATAGGAGTGACAGTAATGGGAGTAAACCGA  
CATAAATTAGTATTTTTTTAGTCTACTAATCCCTGGGGGTACTCCGTTAGGTCTGGTACCT  
CTATTAGTAATAATAGAAACAATATCTTATCTGGCTAGAGCTATTAGCTTAGGAGTAAGA  
TTGGGTGCAAATATGATAGCAGGTCATGTTTTATTAAAAATCTTAGCAGGATTAATCTTG  
AAAATAATGAAAACCTTCGTTAATAACCGGCTTAATAATAGGATGCCTGCCTATGTTTATC  
TTTACTTTATTAGTAGGATTAGAATTAGGTATAAGTGTATTACAAGGGATAGTATTTCTC  
ATTTTAACTTCATCTTATATAAAAGATGCTATTGCTTTACAT**TAG**

>atp6-HHdFL130914-1

**ATG**TTATTGTTTAGAAATCCTTTAGAACAATTTATGATTAACGAGTTATTAACGATATTA

TTCCCTTTCTGGGAAGTGTCATTAACAAATATAGGTTTATATTTAATAATGAGTTTAGTA  
CTAATAGTAATAATATCACAAATCATCCTCGGCTCGACGGGGGGTGTGCCGATAATAGGG  
AATAAAAGTATATTAATAAAACAATCAATATATGATACAGTGCATAAGATAGTAAAAGAT  
CAGATAGGTATATCACATGAAATAAATTTACCTTTTTTATACACATTATTTATATTAGTA  
TTGACATTAAATTTAATTGGAATTATTCCTTATAATTATAGTACAACCTCGCATCTCGTT  
TTAACATTAAGTATGAGTGTATCAATATTAATAGGAGTGACAGTAATGGGAGTAAACCGA  
CATAAATTAGTATTTTTTTAGTCTACTAATCCCTGGGGGTACTCCGTTAGGTCTGGTACCT  
CTATTAGTAATAATAGAAACAATATCTTATCTGGCTAGAGCTATTAGCTTAGGAGTAAGA  
TTGGGTGCAAATATGATAGCAGGTCATGTTTTATTAAAAATCTTAGCAGGATTAATCTTG  
AAAATAATGAAAACCTTCGTTAATAACCGGCTTAATAATAGGATGCCTGCCTATGTTTATC  
TTTACTTTATTAGTAGGATTAGAATTAGGTATAAGTGTATTACAAGGGATAGTATTTCTC  
ATTTTAACTTCATCTTATATAAAAGATGCTATTGCTTTACAT**TAG**

>atp6-Berkeley

**ATG**TTATTGTTTAGAAATCCTTTAGAACAAATTTATGATTAACGAGTTATTAACGATATTA  
TTCCCTTTCTGGGAAGTGTCATTAACAAATATAGGTTTATATTTAATAATGAGTTTAGTA  
CTAATAGTAATAATATCACAAATCATCCTCGGCTCGACGGGGGGTGTGCCGATAATAGGG  
AATAAAAGTATATTAATAAAACAATCAATATATGATACAGTGCATAAGATAGTAAAAGAT  
CAGATAGGTATATCACATGAAATAAATTTACCTTTTTTATACACATTATTTATATTAGTA  
TTGACATTAAATTTAATTGGAATTATTCCTTATAATTATAGTACAACCTCGCATCTCGTT  
TTAACATTAAGTATGAGTGTATCAATATTAATAGGAGTGACAGTAATGGGAGTAAACCGA  
CATAAATTAGTATTTTTTTAGTCTACTAATCCCTGGGGGTACTCCGTTAGGTCTGGTACCT  
CTATTAGTAATAATAGAAACAATATCTTATCTGGCTAGAGCTATTAGCTTAGGAGTAAGA  
TTGGGTGCAAATATGATAGCAGGTCATGTTTTATTAAAAATCTTAGCAGGATTAATCTTG  
AAAATAATGAAAACCTTCGTTAATAACCGGCTTAATAATAGGATGCCTGCCTATGTTTATC  
TTTACTTTATTAGTAGGATTAGAATTAGGTATAAGTGTATTACAAGGGATAGTATTTCTC  
ATTTTAACTTCATCTTATATAAAAGATGCTATTGCTTTACAT**TAG**

>atp6-HHdFL050913-1

**ATG**TTATTGCTTA**AA**AAATCCTTTAGAACAAATTTATGATTAACGAGTTATTAACGATATTA  
TTCCCTTTCTGGGAAGTGTCATTAACAAATATAGGTTTATATTTAATAATGAGTTTAGTA  
CTAATAGTAATAATATCACAAATCATCCTCGGCTCGACGGGGGGTGTGCCGATAATAGGG  
AATAAAAGTATATTAATAAAACAATCAATATATGATACAGTGCATAAGATAGTAAAAGAT  
CAGATAGGTATATCACATGAAATAAATTTACCTTTTTTATACACATTATTTATATTAGTA  
TTGACATTAAATTTAATTGGAAT**C**ATTCCTTATAATTATAGTACAACCTCGCATCTCGTT  
TTAACATTAAGTATGAGTGTATCAATATTAATAGGAGTGACAGTAATGGGAGTAAACCGA  
CATAAATTAGTATTTTTTTAGTCTACTAATCCCTGGGGGTACTCCGTTAGGTCTGGTACCT  
CTATTAGTAATAATAGAAACAATATCTTATCTGGCTAGAGCTATTAGCTTAGGAGTAAGA  
TTGGGTGCAAATATGATAGCAGGTCATGTTTTATTAAAAATCTTAGCAGGATTAATCTTG  
AAAATAATGAAAACCTTCGTTAATAACCGGCTTAATAATAGGATGCCTGCCTATGTTTATC  
TTTACTTTATTAGTAGGATTAGAATTAGGTATAAGTGTATTACAAGGGATAGTATTTCTC  
ATTTTAACTTCATCTTATATAAAAGATGCTATTGCTTTACAT**TAG**

>atp6-consensus

**ATG**TTATTGTTTAGAAATCCTTTAGAACAAATTTATGATTAACGAGTTATTAACGATATTA  
TTCCCTTTCTGGGAAGTGTCATTAACAAATATAGGTTTATATTTAATAATGAGTTTAGTA  
CTAATAGTAATAATATCACAAATCATCCTCGGCTCGACGGGGGGTGTGCCGATAATAGGG

AATAAAAGTATATTAATAAAACAATCAATATATGATACAGTGCATAAGATAGTAAAAGAT  
CAGATAGGTATATCACATGAAATAAATTTACCTTTTTTATACACATTATTTATATTAGTA  
TTGACATTAAATTTAATTGGAATTATTCCTTATAATTATAGTACAACCTCGCATCTCGTT  
TTAACATTAAGTATGAGTGTATCAATATTAATAGGAGTGACAGTAATGGGAGTAAACCGA  
CATAAATTAGTATTTTTTAGTCTACTAATCCCTGGGGTACTCCGTTAGGTCTGGTACCT  
CTATTAGTAATAATAGAAACAATATCTTATCTGGCTAGAGCTATTAGCTTAGGAGTAAGA  
TTGGGTGCAAATATGATAGCAGGTCATGTTTTATTAAAAATCTTAGCAGGATTAATCTTG  
AAAATAATGAAACTTCGTTAATAACCGGCTTAATAATAGGATGCCTGCCTATGTTTATC  
TTTACTTTATTAGTAGGATTAGAATTAGGTATAAGTGTATTACAAGGGATAGTATTTCTC  
ATTTTAACTTCATCTTATATAAAAGATGCTATTGCTTTACAT**TAG**

>atp9-KVL-14-117

**ATG**TTAGAGTCTGCCAAAATTATAGGATCAGGAATAGCAACGATAGGTTTAGCCGGTGCG  
GGTGTGGGTATAGGTTTAGTGTTTGCCGCTCTAATAAATTCAACATCTAGAAATCCTTCA  
TTAAAAGGACAATTATTCAGTTATTGTATTTTAGGTTTTGCTTTAACTGAAGCTATAGGC  
CTTTTTGCAATAATGATGTCATTCTTATTATTATATGCCGCT**TAA**

>atp9-KVL-14-118

**ATG**TTAGAGTCTGCCAAAATTATAGGATCAGGAATAGCAACGATAGGTTTAGCCGGTGCG  
GGTGTGGGTATAGGTTTAGTGTTTGCCGCTCTAATAAATTCAACATCTAGAAATCCTTCA  
TTAAAAGGACAATTATTCAGTTATTGTATTTTAGGTTTTGCTTTAACTGAAGCTATAGGC  
CTTTTTGCAATAATGATGTCATTCTTATTATTATATGCCGCT**TAA**

>atp9-HHdFL130914-1

**ATG**TTAGAGTCTGCCAAAATTATAGGATCAGGAATAGCAACGATAGGTTTAGCCGGTGCG  
GGTGTGGGTATAGGTTTAGTGTTTGCCGCTCTAATAAATTCAACATCTAGAAATCCTTCA  
TTAAAAGGACAATTATTCAGTTATTGTATTTTAGGTTTTGCTTTAACTGAAGCTATAGGC  
CTTTTTGCAATAATGATGTCATTCTTATTATTATATGCCGCT**TAA**

>atp9-Berkeley

**ATG**TTAGAGTCTGCCAAAATTATAGGATCAGGAATAGCAACGATAGGTTTAGCCGGTGCG  
GGTGTGGGTATAGGTTTAGTGTTTGCCGCTCTAATAAATTCAACATCTAGAAATCCTTCA  
TTAAAAGGACAATTATTCAGTTATTGTATTTTAGGTTTTGCTTTAACTGAAGCTATAGGC  
CTTTTTGCAATAATGATGTCATTCTTATTATTATATGCCGCT**TAA**

>atp9-HHdFL050913-1

**ATG**TTAGAGTCTGCCAAAATTATAGGATCAGGAATAGCAACGATAGGTTTAGCCGGTGCG  
GGTGTGGGTATAGGTTTAGTGTTTGCCGCTCTAATAAATTCAACATCTAGAAATCCTTCA  
TTAAAAGGACAATTATTCAGTTATTGTATTTTAGGTTTTGCTTTAACTGAAGCTATAGGC  
CTTTTTGCAATAATGATGTCATTCTTATTATTATATGCCGCT**TAA**

>atp9-consensus

**ATG**TTAGAGTCTGCCAAAATTATAGGATCAGGAATAGCAACGATAGGTTTAGCCGGTGCG  
GGTGTGGGTATAGGTTTAGTGTTTGCCGCTCTAATAAATTCAACATCTAGAAATCCTTCA  
TTAAAAGGACAATTATTCAGTTATTGTATTTTAGGTTTTGCTTTAACTGAAGCTATAGGC  
CTTTTTGCAATAATGATGTCATTCTTATTATTATATGCCGCT**TAA**

>cob-KVL-14-117

**ATG**GCAAATAGTTATATAATTGATTCCCCCTCCCCAGTAATTTAACGTATTTATGGGGT

TATGGGTCATTATTAGGCCTAGTATTAGTTATGCAAATAATAACCGGTGTAACCTAGCT  
ATGCATTATACTCCTAACATTGAGATGGCATTTAATTCAGTTGAACATATCATGAGAGAC  
GTAAATAACGGCTGATTAATTCGTTACACTCACGCAAATGTAGCGTCATTTTTTTTTATA  
TTTTTATATATCCATATAGGAAGAGGTTTATATTATGGTTCCTTATACCAGACCAAGGATA  
TTATTATGGTCTATAGGAGTAATAATATTTGTATTAACAATGGCAACAGGGTTTTTGGGT  
TATACTCTTCCCTGAGGTCAAATGAGCCTATGAGGTGCAACGGTTATAACTAATTTATTA  
TCGGCAATACCTTGGATGGGAGTTAATATAGTGGAAATTTGTCTGGGGTGGATTTTCCGTG  
GATAATGCGACATTAAACAGATTTTTTCAGTCTTCATTATTTATTACCCTTTATATTAGTG  
GGATTAGTGGTATTACATTTAGTAGCTCTTCATCACCATGGAAGTAATAACCCATTAGGG  
GTATCAGCCAATGGTGATAGAGTACCATTCCATCCTTATTATACTTTTAAAGATATAGTA  
GGATTTTTAGCCTTCTTTTTAGTATTATCAATAATTGTCTTCTATATGCCTAATTTATTA  
GGTCATTGAGACAACTACATACCAGCCAACCCGCTGGTAACACCAACTCACATACAACCA  
GAATGGTATTTTTTACCTTATTATGCAATATTACGATCAATCCCTAATAAGCTATTAGGG  
GTTATAGCAATGTTTGCTGCGATATTAATATTATTAGCAATGCCTTTCTTAGATGAATCA  
AGAATACGAGGAAGTCAATTTAGACCTTTTTATGAAAATAATCTTTTGGTTATTTATATCA  
AATTTTCGTATTATTAGGATGGATAGGTGCTAAACCAGTATCAGATCCTTACATAATAATA  
GGTCAGTTAAGTTCAATATTTTTATTTTGCATGGTTTGCAATAGTAGCCATGGTAGGGATA  
ATAGAAAATACTCTATATCAAATGAGACAACCTTTGGCTGGGGGCCAAA**TAG**

>cob-KVL-14-118

**ATG**GCAAATAGTTATATAATTGATTCCCCCTCCCCCAGTAATTTAACGTATTTATGGGGT  
TATGGGTCATTATTAGGCCTAGTATTAGTTATGCAAATAATAACCGGTGTAACCTAGCT  
ATGCATTATACTCCTAACATTGAGATGGCATTTAATTCAGTTGAACATATCATGAGAGAC  
GTAAATAACGGCTGATTAATTCGTTACACTCACGCAAATGTAGCGTCATTTTTTTTTATA  
TTTTTATATATCCATATAGGAAGAGGTTTATATTATGGTTCCTTATACCAGACCAAGGATA  
TTATTATGGTCTATAGGAGTAATAATATTTGTATTAACAATGGCAACAGGGTTTTTGGGT  
TATACTCTTCCCTGAGGTCAAATGAGCCTATGAGGTGCAACGGTTATAACTAATTTATTA  
TCGGCAATACCTTGGATGGGAGTTAATATAGTGGAAATTTGTCTGGGGTGGATTTTCCGTG  
GATAATGCGACATTAAACAGATTTTTTCAGTCTTCATTATTTATTACCCTTTATATTAGTG  
GGATTAGTGGTATTACATTTAGTAGCTCTTCATCACCATGGAAGTAATAACCCATTAGGG  
GTATCAGCCAATGGTGATAGAGTACCATTCCATCCTTATTATACTTTTAAAGATATAGTA  
GGATTTTTAGCCTTCTTTTTAGTATTATCAATAATTGTCTTCTATATGCCTAATTTATTA  
GGTCATTGAGACAACTACATACCAGCCAACCCGCTGGTAACACCAACTCACATACAACCA  
GAATGGTATTTTTTACCTTATTATGCAATATTACGATCAATCCCTAATAAGCTATTAGGG  
GTTATAGCAATGTTTGCTGCGATATTAATATTATTAGCAATGCCTTTCTTAGATGAATCA  
AGAATACGAGGAAGTCAATTTAGACCTTTTTATGAAAATAATCTTTTGGTTATTTATATCA  
AATTTTCGTATTATTAGGATGGATAGGTGCTAAACCAGTATCAGATCCTTACATAATAATA  
GGTCAGTTAAGTTCAATATTTTTATTTTGCATGGTTTGCAATAGTAGCCATGGTAGGGATA  
ATAGAAAATACTCTATATCAAATGAGACAACCTTTGGCTGGGGGCCAAA**TAG**

>cob-HHdFL130914-1

**ATG**GCAAATAGTTATATAATTGATTCCCCCTCCCCCAGTAATTTAACGTATTTATGGGGT  
TATGGGTCATTATTAGGCCTAGTATTAGTTATGCAAATAATAACCGGTGTAACCTAGCT  
ATGCATTATACTCCTAACATTGAGATGGCATTTAATTCAGTTGAACATATCATGAGAGAC  
GTAAATAACGGCTGATTAATTCGTTACACTCACGCAAATGTAGCGTCATTTTTTTTTATA  
TTTTTATATATCCATATAGGAAGAGGTTTATATTATGGTTCCTTATACCAGACCAAGGATA

TTATTATGGTCTATAGGAGTAATAATATTTGTATTAAACAATGGCAACAGGGTTTTTGGGT  
TATACTCTTCCCTGAGGTCAAATGAGCCTATGAGGTGCAACGGTTATAACTAATTTATTA  
TCGGCAATACCTTGGATGGGAGTTAATATAGTGAATTTGTCTGGGGTGGATTTTCCGTG  
GATAATGCGACATTAAACAGATTTTTTCAGTCTTCATTATTTATTACCCTTTATATTAGTG  
GGATTAGTGGTATTACATTTAGTAGCTCTTCATCACCATGGAAGTAATAACCCATTAGGG  
GTATCAGCCAATGGTGATAGAGTACCATTCCATCCTTATTATACTTTTAAAGATATAGTA  
GGATTTTTAGCCTTCTTTTTAGTATTATCAATAATTGTCTTCTATATGCCTAATTTATTA  
GGTCATTGAGACAACACTACATACCAGCCAACCCGCTGGTAACACCAACTCACATACAACCA  
GAATGGTATTTTTTACCTTATTATGCAATATTACGATCAATCCCTAATAAGCTATTAGGG  
GTTATAGCAATGTTTGCTGCGATATTAATATTATTAGCAATGCCTTTCTTAGATGAATCA  
AGAATACGAGGAAGTCAATTTAGACCTTTTTATGAAAATAATCTTTTGGTTATTTATATCA  
AATTTTCGTATTATTAGGATGGATAGGTGCTAAACCAGTATCAGATCCTTACATAATAATA  
GGTCAGTTAAGTTCAATATTTTTATTTTGCATGGTTTGCAATAGTAGCCATGGTAGGGATA  
ATAGAAAATACTCTATATCAAATGAGACAACCTTTGGCTGGGGGCCAAATAG

>cob-Berkeley

ATGGCAAATAGTTATATAATTGATTCCCCCTCCCCCAGTAATTTAACGTATTTATGGGGT  
TATGGGTCATTATTAGGCCTAGTATTAGTTATGCAAATAATAACCGGTGTAACCTCTAGCT  
ATGCATTATACTCCTAACATTGAGATGGCATTTAATTCAGTTGAACATATCATGAGAGAC  
GTAAATAACGGCTGATTAATTCGTTACACTCACGCAAATGTAGCGTCATTTTTTTTTATA  
TTTTTATATATCCATATAGGAAGAGGTTTATATTATGGTTCTTATACCAGACCAAGGATA  
TTATTATGGTCTATAGGAGTAATAATATTTGTATTAAACAATGGCAACAGGGTTTTTGGGT  
TATACTCTTCCCTGAGGTCAAATGAGCCTATGAGGTGCAACGGTTATAACTAATTTATTA  
TCGGCAATACCTTGGATGGGAGTTAATATAGTGAATTTGTCTGGGGTGGATTTTCCGTG  
GATAATGCGACATTAAACAGATTTTTTCAGTCTTCATTATTTATTACCCTTTATATTAGTG  
GGATTAGTGGTATTACATTTAGTAGCTCTTCATCACCATGGAAGTAATAACCCATTAGGG  
GTATCAGCCAATGGTGATAGAGTACCATTCCATCCTTATTATACTTTTAAAGATATAGTA  
GGATTTTTAGCCTTCTTTTTAGTATTATCAATAATTGTCTTCTATATGCCTAATTTATTA  
GGTCATTGAGACAACACTACATACCAGCCAACCCGCTGGTAACACCAACTCACATACAACCA  
GAATGGTATTTTTTACCTTATTATGCAATATTACGATCAATCCCTAATAAGCTATTAGGG  
GTTATAGCAATGTTTGCTGCGATATTAATATTATTAGCAATGCCTTTCTTAGATGAATCA  
AGAATACGAGGAAGTCAATTTAGACCTTTTTATGAAAATAATCTTTTGGTTATTTATATCA  
AATTTTCGTATTATTAGGATGGATAGGTGCTAAACCAGTATCAGATCCTTACATAATAATA  
GGTCAGTTAAGTTCAATATTTTTATTTTGCATGGTTTGCAATAGTAGCCATGGTAGGGATA  
ATAGAAAATACTCTATATCAAATGAGACAACCTTTGGCTGGGGGCCAAATAG

>cob-HHdFL050913-1

ATGGCAAATAGTTATATAATTGATTCCCCCTCCCCCAGTAATTTAACGTATTTATGGGGT  
TATGGGTCATTATTAGGCCTAGTATTAGTTATGCAAATAATAACCGGTGTAACCTCTAGCT  
ATGCATTATACTCCTAACATTGAGATGGCATTTAATTCAGTTGAACATATCATGAGAGAC  
GTAAATAACGGCTGATTAATTCGTTACACTCACGCAAATGTAGCGTCATTTTTTTTTATA  
TTTTTATATATCCATATAGGAAGAGGTTTATATTATGGTTCTTATACCAGACCAAGGATA  
TTATTATGGTCTATAGGAGTAATAATATTTGTATTAAACAATGGCAACAGGGTTTTTGGGT  
TATACTCTTCCCTGAGGTCAAATGAGCCTATGAGGTGCAACGGTTATAACTAATTTATTA  
TCGGCAATACCTTGGATGGGAGTAATATAGTGAATTTGTCTGGGGTGGATTTTCCGTG  
GATAATGCGACATTAAACAGATTTTTTCAGTCTTCATTATTTATTACCCTTTATATTAGTG

GGATTAGTGGTATTACATTTAGTAGCTCTTCATCACCATGGAAGTAATAACCCATTAGGG  
GTATCAGCCAATGGTGATAGAGTACCATTCCATCCTTATTATACTTTTAAAGATATAGTA  
GGATTTTTAGCCTTCTTTTAGTATTATCAATAATTGTCTTCTATATGCCTAATTTATTA  
GGTCATT CAGACA ACTACATA ACCAGCCAACCCGCTGGTAACACCAACTCACATAACAACCA  
GAATGGTATTTTTTACCTTATTATGCAATATTACGATCAATCCCTAATAAGCTATTAGGG  
GTTATAGCAATGTTTGCTGCGATATTAATATTATTAGCAATGCCTTTCTTAGATGAATCA  
AGAATACGAGGAAGTCAATTTAGACCTTTTATGAAAATAATCTTTTGGTTATTTATATCA  
AATTTTCGTATTATTAGGATGGATAGGTGCTAAACCAGTATCAGATCCTTACATAATAATA  
GGTCAGTTAAGTTCAATATTTTTATTTTGCATGGTTTGCAATAGTAGCCATGGTAGGGATA  
ATAGAAAATACTCTATATCAAATGAGACA ACTTTGGCTGGGGGCCAAA **TAG**

>cob-consensus

**ATG**GCAAATAGTTATATAATTGATTCCCCCTCCCCAGTAATTTAACGTATTTATGGGGT  
TATGGGT CATTATTAGGCCTAGTATTAGTTATGCAAATAATAACCGGTGTA ACTCTAGCT  
ATGCATTATACTCCTAACATTGAGATGGCATTTAATTCAGTTGAACATATCATGAGAGAC  
GTAAATAACGGCTGATTAATTCGTTACACTCACGCAAATGTAGCGTCATTTTTTTTTATA  
TTTTTATATATCCATATAGGAAGAGGTTTATATTATGGTTCTTATACCAGACCAAGGATA  
TTATTATGGTCTATAGGAGTAATAATTTGTATTAACAATGGCAACAGGGTTTTTGGGT  
TATACTCTTCCCTGAGGTCAAATGAGCCTATGAGGTGCAACGGTTATAACTAATTTATTA  
TCGGCAATACCTTGGATGGGAGTTAATATAGTGGAATTTGTCTGGGGTGGATTTTCCGTG  
GATAATGCGACATTAAACAGATTTTTTCAGTCTTCATTATTTATTACCCTTTATATTAGTG  
GGATTAGTGGTATTACATTTAGTAGCTCTTCATCACCATGGAAGTAATAACCCATTAGGG  
GTATCAGCCAATGGTGATAGAGTACCATTCCATCCTTATTATACTTTTAAAGATATAGTA  
GGATTTTTAGCCTTCTTTTAGTATTATCAATAATTGTCTTCTATATGCCTAATTTATTA  
GGTCATT CAGACA ACTACATA ACCAGCCAACCCGCTGGTAACACCAACTCACATAACAACCA  
GAATGGTATTTTTTACCTTATTATGCAATATTACGATCAATCCCTAATAAGCTATTAGGG  
GTTATAGCAATGTTTGCTGCGATATTAATATTATTAGCAATGCCTTTCTTAGATGAATCA  
AGAATACGAGGAAGTCAATTTAGACCTTTTATGAAAATAATCTTTTGGTTATTTATATCA  
AATTTTCGTATTATTAGGATGGATAGGTGCTAAACCAGTATCAGATCCTTACATAATAATA  
GGTCAGTTAAGTTCAATATTTTTATTTTGCATGGTTTGCAATAGTAGCCATGGTAGGGATA  
ATAGAAAATACTCTATATCAAATGAGACA ACTTTGGCTGGGGGCCAAA **TAG**

>cox1-KVL-14-117

**GTG**TACGCTATAAGGTGGTTATACTCGACCAATGCCCCGAGATATTGGGGTATTATATTTA  
ATTTTTGCCATCTTGGCGGGATTAATAGGGACAGTATTATCAATCATAATAAGATTAGAA  
TTAGGAGGTGCGGGGGTTCAATATTTACAAGGAGATAACCAATTATACAATGTGGTTGTG  
ACGGCACACGCATTTCGTC **ATG**ATTTTTTTTCATGGTGATGCCGGCGTTAATAGGGGGTTTT  
GGGAATTTTATAGTTCCAGTGATGATAGGTGCCGCTGATATGGCATTCCCAAGATTAAAT  
AATATATCATTTTTGGTTATTACCTCCATCATTGATATTATTATTATTATCATCATTAGTT  
GAGAATGGTGCGGGTACTGGTTGGACTGTTTATCCTCCATTATCATCAATCCAAGCTCAC  
TCAGGAGGATCGGTTGATTTAGCAATATTCTCGCTTCACCTGGCAGGGATATCTTCTATG  
TTAGGTGCAATAAATTTCTTAACAACAATAATTAATATGCGAGCCCCGGGTATGAGCTGG  
CATAAATTGCCGTTATTTGTGTGGGCAGTATTTATAACTGCAATATTATTATTATTATCA  
TTACCAGTGTTAGCGGGTGAATAACTATGCTTCTTACAGATAGAACTTTAATAGTTCT  
TTCTATGACCCATCAGCTGGGGGTGATCCAGTGCTTTATCAGCATATTTTCTGATTTCTTT

GGTCATCCTGAAGTGTATATATTAATTATACCAGGATTTGGTATAATAAGTCATGTAATA  
TCAACTTATTCCGGTAAAAGAGTATTCCGTTATCTAGGTATGATATACGCATTAGCTTCA  
ATAGGAATCTTAGGATTCATAGTATGGTCTCATCACATGTTCACTGTAGGTCTAGATGTC  
GATACAAGAGCATATTTCACTTCAGCGACATTAATAATTGCAGTGCCAACAGGGATAAAA  
ATATTCTCGTGGCTGGCGACGATATACGGGGGAAGTATAAGATTTAGTACTCCTATGTTA  
TTTTCTATGGGATTCATATTTTTATTTACAGTAGGAGGATTAAGTGGAGTAATATTAGCC  
AATGCCTCGTTAGATATAGCTTTACATGATACTTACTACGTGGTAGCACATTTCCATTAT  
GTATTATCAATGGGAGCAGTATTTGCATTATTTGCAGCATTCTATTATTGAATAGGTAAA  
ATTACTGGAAAACAATATAATGAATTATTAGGGCAGATACATTTTTATACGATGTTTGTC  
GGGGTAAATATAACATTCTTCCCAATGCATTTCTTAGGTCTGGCGGGTATGCCACGTAGA  
ATACCAGACTATCCAGATGCTTTATAGGATGGAATTATATAGCATCCTTAGGATCAATA  
ATAAGTTTAGTATCAACAGTATTATTCTTATACATAGTCTATGATTTATTAATAATGAG  
GTGGAAGCAAGCGACGGAGCCGATGTAGAAAACGAGTACTTTATATCGAGATGGTCAACT  
AAATATGCTCAGACCTTAGAGTGGAGTTTAAACAAGCCACCTGGCTTCCATTGTTATAAT  
AGTTTACCAACCTTCCTAACGAAGTAA

>cox1-KVL-14-118

GTTACGCTATAAGGTGGTTATACTCGACCAATGCCCCGAGATATTGGGGTATTATATTTA  
ATTTTTGCCATCTTGGCGGGATTAATAGGGACAGTATTATCAATCATAATAAGATTAGAA  
TTAGGAGGTGCGGGGTTCAATATTTACAAGGAGATAACCAATTATACAATGTGGTTGTG  
ACGGCACACGCATTTCGTCATGATTTTTTTTCATGGTGATGCCGGCGTTAATAGGGGGTTTT  
GGGAATTTTATAGTTCCAGTGATGATAGGTGCCGCTGATATGGCATTCCCAAGATTAAAT  
AATATATCATTTTTGGTTATTACCTCCATCATTGATATTATTATTATTATCATCATTAGTT  
GAGAATGGTGCGGGTACTGGTTGGACTGTTTATCCTCCATTATCATCAATCCAAGCTCAC  
TCAGGAGGATCGGTTGATTTAGCAATATTCTCGCTTCACCTGGCAGGGATATCTTCTATG  
TTAGGTGCAATAAATTTCTTAACAACAATAATTAATATGCGAGCCCCGGGTATGAGCTGG  
CATAAATTGCCGTTATTTGTGTGGGCAGTATTTATAACTGCAATATTATTATTATTATCA  
TTACCAGTGTTAGCGGGTGAATAACTATGCTTCTTACAGATAGAACTTTAATAGTTCT  
TTCTATGACCCATCAGCTGGGGGTGATCCAGTGCTTTATCAGCATATTTTCTGATTCTTT  
GGTCATCCTGAAGTGTATATATTAATTATACCAGGATTTGGTATAATAAGTCATGTAATA  
TCAACTTATTCCGGTAAAAGAGTATTCCGTTATCTAGGTATGATATACGCATTAGCTTCA  
ATAGGAATCTTAGGATTCATAGTATGGTCTCATCACATGTTCACTGTAGGTCTAGATGTC  
GATACAAGAGCATATTTCACTTCAGCGACATTAATAATTGCAGTGCCAACAGGGATAAAA  
ATATTCTCGTGGCTGGCGACGATATACGGGGGAAGTATAAGATTTAGTACTCCTATGTTA  
TTTTCTATGGGATTCATATTTTTATTTACAGTAGGAGGATTAAGTGGAGTAATATTAGCC  
AATGCCTCGTTAGATATAGCTTTACATGATACTTACTACGTGGTAGCACATTTCCATTAT  
GTATTATCAATGGGAGCAGTATTTGCATTATTTGCAGCATTCTATTATTGAATAGGTAAA  
ATTACTGGAAAACAATATAATGAATTATTAGGGCAGATACATTTTTATACGATGTTTGTC  
GGGGTAAATATAACATTCTTCCCAATGCATTTCTTAGGTCTGGCGGGTATGCCACGTAGA  
ATACCAGACTATCCAGATGCTTTATAGGATGGAATTATATAGCATCCTTAGGATCAATA  
ATAAGTTTAGTATCAACAGTATTATTCTTATACATAGTCTATGATTTATTAATAATGAG  
GTGGAAGCAAGCGACGGAGCCGATGTAGAAAACGAGTACTTTATATCGAGATGGTCAACT  
AAATATGCTCAGACCTTAGAGTGGAGTTTAAACAAGCCACCTGGCTTCCATTGTTATAAT  
AGTTTACCAACCTTCCTAACGAAGTAA

>cox1-HHdFL130914-1

GTG TACGCTATAAGGTGGTTATACTCGACCAATGCCCCGAGATATTGGGGTATTATATTTA  
ATTTTTGCCATCTTGGCGGGGATTAATAGGGACAGTATTATCAATCATAATAAGATTAGAA  
TTAGGAGGTGCGGGGGTTCAATATTTACAAGGAGATAACCAATTATACAATGTGGTTGTG  
ACGGCACACGCATTTCGTCATGATTTTTTTTCATGGTGATGCCGGCGTTAATAGGGGGTTTT  
GGGAATTTTATAGTTCCAGTGATGATAGGTGCCGCTGATATGGCATTCCCAAGATTAAAT  
AATATATCATTTTTGGTTATTACCTCCATCATTGATATTATTATTATTATCATCATTAGTT  
GAGAATGGTGCGGGTACTGGTTGGACTGTTTATCCTCCATTATCATCAATCCAAGCTCAC  
TCAGGAGGATCGGTTGATTTAGCAATATTCTCGCTTCACCTGGCAGGGATATCTTCTATG  
TTAGGTGCAATAAATTTCTTAACAACAATAATTAATATGCGAGCCCCGGGTATGAGCTGG  
CATAAATTGCCGTTATTTGTGTGGGCAGTATTTATAACTGCAATATTATTATTATTATCA  
TTACCAGTGTTAGCGGGTGAATAACTATGCTTCTTACAGATAGAACTTTAATAGTTCT  
TTCTATGACCCATCAGCTGGGGGTGATCCAGTGCTTTATCAGCATATTTTCTGATTCTTT  
GGTCATCCTGAAGTGATATATATTAATTATACCAGGATTTGGTATAATAAGTCATGTAATA  
TCAACTTATTCCGGTAAAAGAGTATTCCGTTATCTAGGTATGATATACGCATTAGCTTCA  
ATAGGAATCTTAGGATTCATAGTATGGTCTCATCACATGTTCACTGTAGGTCTAGATGTC  
GATACAAGAGCATATTTCACTTCAGCGACATTAATAATTGCAGTGCCAACAGGGATAAAA  
ATATTCTCGTGGCTGGCGACGATATACGGGGGAAGTATAAGATTTAGTACTCCTATGTTA  
TTTTCTATGGGATTCATATTTTTATTTACAGTAGGAGGATTAAGTGGAGTAATATTAGCC  
AATGCCTCGTTAGATATAGCTTTACATGATACTTACTACGTGGTAGCACATTTCCATTAT  
GTATTATCAATGGGAGCAGTATTTGCATTATTTGCAGCATTCTATTATTGAATAGGTAAA  
ATTACTGGAAAACAATATAATGAATTATTAGGGCAGATACATTTTTATACGATGTTTGTG  
GGGGTAAATATAACATTCTTCCCAATGCATTTCTTAGGTCTGGCGGGTATGCCACGTAGA  
ATACCAGACTATCCAGATGCTTTATAGGATGGAATTATATAGCATCCTTAGGATCAATA  
ATAAGTTTATGATCAACAGTATTATTCTTATACATAGTCTATGATTTATTAATAATGAG  
GTGGAAGCAAGCGACGGAGCCGATGTAGAAAACGAGTACTTTATATCGAGATGGTCAACT  
AAATATGCTCAGACCTTAGAGTGGAGTTTAAACAAGCCCACCTGGCTTCCATTGTTATAAT  
AGTTTACCAACCTTCTAACGAAGTAA

>cox1-Berkeley

GTG TACGCTATAAGGTGGTTATACTCGACCAATGCCCCGAGATATTGGGGTATTATATTTA  
ATTTTTGCCATCTTGGCGGGGATTAATAGGGACAGTATTATCAATCATAATAAGATTAGAA  
TTAGGAGGTGCGGGGGTTCAATATTTACAAGGAGATAACCAATTATACAATGTGGTTGTG  
ACGGCACACGCATTTCGTCATGATTTTTTTTCATGGTGATGCCGGCGTTAATAGGGGGTTTT  
GGGAATTTTATAGTTCCAGTGATGATAGGTGCCGCTGATATGGCATTCCCAAGATTAAAT  
AATATATCATTTTTGGTTATTACCTCCATCATTGATATTATTATTATTATCATCATTAGTT  
GAGAATGGTGCGGGTACTGGTTGGACTGTTTATCCTCCATTATCATCAATCCAAGCTCAC  
TCAGGAGGATCGGTTGATTTAGCAATATTCTCGCTTCACCTGGCAGGGATATCTTCTATG  
TTAGGTGCAATAAATTTCTTAACAACAATAATTAATATGCGAGCCCCGGGTATGAGCTGG  
CATAAATTGCCGTTATTTGTGTGGGCAGTATTTATAACTGCAATATTATTATTATTATCA  
TTACCAGTGTTAGCGGGTGAATAACTATGCTTCTTACAGATAGAACTTTAATAGTTCT  
TTCTATGACCCATCAGCTGGGGGTGATCCAGTGCTTTATCAGCATATTTTCTGATTCTTT  
GGTCATCCTGAAGTGATATATATTAATTATACCAGGATTTGGTATAATAAGTCATGTAATA  
TCAACTTATTCCGGTAAAAGAGTATTCCGTTATCTAGGTATGATATACGCATTAGCTTCA  
ATAGGAATCTTAGGATTCATAGTATGGTCTCATCACATGTTCACTGTAGGTCTAGATGTC  
GATACAAGAGCATATTTCACTTCAGCGACATTAATAATTGCAGTGCCAACAGGGATAAAA



ATATTCTCGTGGCTGGCGACGATATACGGGGGAAGTATAAGATTTAGTACTCCTATGTTA  
TTTTCTATGGGATTCATATTTTTATTTACAGTAGGAGGATTAAGTGGAGTAATATTAGCC  
AATGCCTCGTTAGATATAGCTTTACATGATACTTACTACGTGGTAGCACATTTCCATTAT  
GTATTATCAATGGGAGCAGTATTTGCATTATTTGCAGCATTCTATTATTGAATAGGTAAA  
ATTACTGGAAAACAATATAATGAATTATTAGGGCAGATACATTTTTATACGATGTTTGTC  
GGGGTAAATATAACATTCTTCCCAATGCATTTCTTAGGTCTGGCGGGTATGCCACGTAGA  
ATACCAGACTATCCAGATGCTTTATAGGATGGAATTATATAGCATCCTTAGGATCAATA  
ATAAGTTTAGTATCAACAGTATTATTCTTATACATAGTCTATGATTTATTAAGTAATGAG  
GTGGAAGCAAGCGACGGAGCCGATGTAGAAAACGAGTACTTTATATCGAGATGGTCAACT  
AAATATGCTCAGACCTTAGAGTGGAGTTTAAACAAGCCCACCTGGCTTCCATTGTTATAAT  
AGTTTACCAACCTTCCTAACGAAGTAA

>cox1-HHdFL050913-1

GTGTACGCTATAAGGTGGTTATACTCGACCAATGCCCCGAGATATTGGGGTATTATATTTA  
ATTTTTGCCATCTTGGCGGGATTAATAGGGACAGTATTATCAATCATAATAAGATTAGAA  
TTAGGAGGTGCGGGGGTTCAATATTTACAAGGAGATAACCAATTATACAATGTGGTTGTG  
ACGGCACACGCATTTCGTCATGTTTTTTTTCATGGTGATGCCGGCGTTAATAGGGGGTTTT  
GGGAATTTTATAGTTCCAGTGATGATAGGTGCCGCTGATATGGCATTCCCAAGATTAAAT  
AATATATCATTTTTGGTTATTACCTCCATCATTGATATTATTATTATTATCATCATTAGTT  
GAGAATGGTGCGGGTACTGGTTGGACTGTTTATCCTCCATTATCATCAATCCAAGCTCAC  
TCAGGAGGATCGGTTGATTTAGCAATATTCTCGCTTCACCTGGCAGGGATATCTTCTATG  
TTAGGTGCAATAAATTTCTTAACAACAATAATTAATATGCGAGCCCCGGGTATGAGCTGG  
CATAAATTGCCGTTATTTGTGTGGGCAGTATTTATAACTGCAATATTATTATTATTATCA  
TTACCAGTGTTAGCGGGTGAATAACTATGCTTCTTACAGATAGAACTTTAATAGTTCT  
TTCTATGACCCATCAGCTGGGGGTGATCCAGTGCTTTATCAGCATATTTTCTGATTCTTT  
GGTCATCCTGAAGTGATATATTAATTATACCAGGATTTGGTATAATAAGTCATGTAATA  
TCAACTTATTCCGGTAAAAGAGTATTCGGTTATCTAGGTATGATATACGCATTAGCTTCA  
ATAGGAATCTTAGGATTCATAGTATGGTCTCATCACATGTTCACTGTAGGTCTAGATGTC  
GATACAAGAGCATATTTCACTTCAGCGACATTAATAATTGCAGTGCCAACAGGGATAAAA  
ATATTCTCGTGGCTGGCGACGATATACGGGGGAAGTATAAGATTTAGTACTCCTATGTTA  
TTTTCTATGGGATTCATATTTTTATTTACAGTAGGAGGATTAAGTGGAGTAATATTAGCC  
AATGCCTCGTTAGATATAGCTTTACATGATACTTACTACGTGGTAGCACATTTCCATTAT  
GTATTATCAATGGGAGCAGTATTTGCATTATTTGCAGCATTCTATTATTGAATAGGTAAA  
ATTACTGGAAAACAATATAATGAATTATTAGGGCAGATACATTTTTATACGATGTTTGTC  
GGGGTAAATATAACATTCTTCCCAATGCATTTCTTAGGTCTGGCGGGTATGCCACGTAGA  
ATACCAGACTATCCAGATGCTTTATAGGATGGAATTATATAGCATCCTTAGGATCAATA  
ATAAGTTTAGTATCAACAGTATTATTCTTATACATAGTCTATGATTTATTAAGTAATGAG  
GTGGAAGCAAGCGACGGAGCCGATGTAGAAAACGAGTACTTTATATCGAGATGGTCAACT  
AAATATGCTCAGACCTTAGAGTGGAGTTTAAACAAGCCCACCTGGCTTCCATTGTTATAAT  
AGTTTACCAACCTTCCTAACGAAGTAA

>cox1-consensus

GTGTACGCTATAAGGTGGTTATACTCGACCAATGCCCCGAGATATTGGGGTATTATATTTA  
ATTTTTGCCATCTTGGCGGGATTAATAGGGACAGTATTATCAATCATAATAAGATTAGAA  
TTAGGAGGTGCGGGGGTTCAATATTTACAAGGAGATAACCAATTATACAATGTGGTTGTG  
ACGGCACACGCATTTCGTCATGTTTTTTTTCATGGTGATGCCGGCGTTAATAGGGGGTTTT

GGGAATTTTATAGTTCCAGTGATGATAGGTGCCGCTGATATGGCATTCCCAAGATTAAAT  
AATATATCATTTTTGGTTATTACCTCCATCATTGATATTATTATTATCATCATTAGTT  
GAGAATGGTGCGGGTACTGGTTGGACTGTTTATCCTCCATTATCATCAATCCAAGCTCAC  
TCAGGAGGATCGGTTGATTTAGCAATATTCTCGCTTCACCTGGCAGGGATATCTTCTATG  
TTAGGTGCAATAAATTTCTTAACAACAATAATTAATATGCGAGCCCCGGGTATGAGCTGG  
CATAAATTGCCGTTATTTGTGTGGGCAGTATTTATAACTGCAATATTATTATTATTATCA  
TTACCAGTGTTAGCGGGTGAATAACTATGCTTCTTACAGATAGAACTTTAATAGTTCT  
TTCTATGACCCATCAGCTGGGGGTGATCCAGTGCTTTATCAGCATATTTTCTGATTCTTT  
GGTCATCCTGAAGTGATATATTAATTATACCAGGATTTGGTATAATAAGTCATGTAATA  
TCAACTTATTCCGGTAAAAGAGTATTCGGTTATCTAGGTATGATATACGCATTAGCTTCA  
ATAGGAATCTTAGGATTCATAGTATGGTCTCATCACATGTTCACTGTAGGTCTAGATGTC  
GATACAAGAGCATATTTCACTTCAGCGACATTAATAATTGCAGTGCCAACAGGGATAAAA  
ATATTCTCGTGGCTGGCGACGATATACGGGGGAAGTATAAGATTTAGTACTCCTATGTTA  
TTTTCTATGGGATTCATATTTTTATTTACAGTAGGAGGATTAAGTGGAGTAATATTAGCC  
AATGCCTCGTTAGATATAGCTTTACATGATACTTACTACGTGGTAGCACATTTCCATTAT  
GTATTATCAATGGGAGCAGTATTTGCATTATTTGCAGCATTCTATTATTGAATAGGTAAA  
ATTACTGGAAAACAATATAATGAATTATTAGGGCAGATACATTTTTATACGATGTTTGTG  
GGGGTAAATATAACATTCTTCCCAATGCATTTCTTAGGTCTGGCGGGTATGCCACGTAGA  
ATACCAGACTATCCAGATGCTTTCATAGGATGGAATTATATAGCATCCTTAGGATCAATA  
ATAAGTTTAGTATCAACAGTATTATTCTTATACATAGTCTATGATTTATTAACATAATGAG  
GTGGAAGCAAGCGACGGAGCCGATGTAGAAAACGAGTACTTTATATCGAGATGGTCAACT  
AAATATGCTCAGACCTTAGAGTGGAGTTTAAACAAGCCCACCTGGCTTCCATTGTTATAAT  
AGTTTACCAACCTTCCTAACGAAGTAA

>cox2-KVL-14-117

ATGTGATTAAATTATATAATGAACGATGCACCAGAGGGGTGACAATTAGGTTTTCAAGAT  
AGTGCAAGTCCTATAGCAGAAGGGATATTAAGAATACATAATGAAATACAATATTATTTA  
TTAATAATTCTAGTATTAATATGTTGGATAATAACTTCAATAATTTTCAAATTCATGAA  
GAAAGTAATAAATTTAAATCTAAATATATGAATCATGGTACATTAATAGAATTAATTTGA  
ACAATAACACCTGCGTTAATCTTAGTCGCCATAGCTATACCTTCATTTAAATTATTATAT  
TTAATGGATGAAGTAATAGAACCAACCATTACATTACAAATTACCGGTCACCAATGATAT  
TGGTCTACAGAATACTCTGACTATGTAAAACAATCAGGCAATATTGAGTTTGACAGTTAT  
ATGATCGCAACCTCGGATTTAGAATTAGGTAAATTAAGATTATTGGAAGTAGATAATAGA  
GTAATATTACCAGTAGACACACATGTCAGAGTAATAGTTACGAGTACCGATGTAATACAC  
TCACTAGCATTACCATCCTTAGGGGTTAAATGACTGTTGCCCAGGTGATTAAACCAA  
ACATCTTTTATAATAAAAAGAGAAGGTGTATTCTACGGACAATGCTCAGAACTTTGCGGA  
CATGCACACGGTTTCATGCCGATAGTAATAGAGGGGGTAACATTAGAGGATTACTTAGTA  
TGGGTTAATGAGTCGGTAGAAGAA TAG

>cox2-KVL-14-118

ATGTGATTAAATTATATAATGAACGATGCACCAGAGGGGTGACAATTAGGTTTTCAAGAT  
AGTGCAAGTCCTATAGCAGAAGGGATATTAAGAATACATAATGAAATACAATATTATTTA  
TTAATAATTCTAGTATTAATATGTTGGATAATAACTTCAATAATTTTCAAATTCATGAA  
GAAAGTAATAAATTTAAATCTAAATATATGAATCATGGTACATTAATAGAATTAATTTGA  
ACAATAACACCTGCGTTAATCTTAGTCGCCATAGCTATACCTTCATTTAAATTATTATAT

TTAATGGATGAAGTAATAGAACCAACCATTACATTACAAATTACCGGTCACCAATGATAT  
TGGTCTACAGAATACTCTGACTATGTAAAACAATCAGGCAATATTGAGTTTGACAGTTAT  
ATGATCGCAACCTCGGATTTAGAATTAGGTAAATTAAGATTATTGGAAGTAGATAATAGA  
GTAATATTACCAGTAGACACACATGTCAGAGTAATAGTTACGAGTACCGATGTAATACAC  
TCACTAGCATTACCATCCTTAGGGGTAAAATTGACTGTTGCCCAGGTCGATTAAACCAA  
ACATCTTTCATAATAAAAAGAGAAGGTGTATTCTACGGACAATGCTCAGAACTTTGCGGA  
CATGCACACGGTTTCATGCCGATAGTAATAGAGGGGGTAACATTAGAGGATTACTTAGTA  
TGGGTAAATGAGTCGGTAGAAGAA**TAG**

>cox2-HHdFL130914-1

**ATG**TGATTAAATTATATAATGAACGATGCACCAGAGGGGTGACAATTAGGTTTTCAAGAT  
AGTGAAGTCCTATAGCAGAAGGGATATTAAGAATACATAATGAAATACAATATTATTTA  
TTAATAATTCTAGTATTAATATGTTGGATAATAACTTCAATAATTTTCAAATTCAATGAA  
GAAAGTAATAAATTTAAATCTAAATATATGAATCATGGTACATTAATAGAATTAATTTGA  
ACAATAACACCTGCGTTAATCTTAGTCGCCATAGCTATACCTTCATTTAAATTATTATAT  
TTAATGGATGAAGTAATAGAACCAACCATTACATTACAAATTACCGGTCACCAATGATAT  
TGGTCTACAGAATACTCTGACTATGTAAAACAATCAGGCAATATTGAGTTTGACAGTTAT  
ATGATCGCAACCTCGGATTTAGAATTAGGTAAATTAAGATTATTGGAAGTAGATAATAGA  
GTAATATTACCAGTAGACACACATGTCAGAGTAATAGTTACGAGTACCGATGTAATACAC  
TCACTAGCATTACCATCCTTAGGGGTAAAATTGACTGTTGCCCAGGTCGATTAAACCAA  
ACATCTTTCATAATAAAAAGAGAAGGTGTATTCTACGGACAATGCTCAGAACTTTGCGGA  
CATGCACACGGTTTCATGCCGATAGTAATAGAGGGGGTAACATTAGAGGATTACTTAGTA  
TGGGTAAATGAGTCGGTAGAAGAA**TAG**

>cox2-Berkeley

**ATG**TGATTAAATTATATAATGAACGATGCACCAGAGGGGTGACAATTAGGTTTTCAAGAT  
AGTGAAGTCCTATAGCAGAAGGGATATTAAGAATACATAATGAAATACAATATTATTTA  
TTAATAATTCTAGTATTAATATGTTGGATAATAACTTCAATAATTTTCAAATTCAATGAA  
GAAAGTAATAAATTTAAATCTAAATATATGAATCATGGTACATTAATAGAATTAATTTGA  
ACAATAACACCTGCGTTAATCTTAGTCGCCATAGCTATACCTTCATTTAAATTATTATAT  
TTAATGGATGAAGTAATAGAACCAACCATTACATTACAAATTACCGGTCACCAATGATAT  
TGGTCTACAGAATACTCTGACTATGTAAAACAATCAGGCAATATTGAGTTTGACAGTTAT  
ATGATCGCAACCTCGGATTTAGAATTAGGTAAATTAAGATTATTGGAAGTAGATAATAGA  
GTAATATTACCAGTAGACACACATGTCAGAGTAATAGTTACGAGTACCGATGTAATACAC  
TCACTAGCATTACCATCCTTAGGGGTAAAATTGACTGTTGCCCAGGTCGATTAAACCAA  
ACATCTTTCATAATAAAAAGAGAAGGTGTATTCTACGGACAATGCTCAGAACTTTGCGGA  
CATGCACACGGTTTCATGCCGATAGTAATAGAGGGGGTAACATTAGAGGATTACTTAGTA  
TGGGTAAATGAGTCGGTAGAAGAA**TAG**

>cox2-HHdFL050913-1

**ATG**TGATTAAATTATATAATGAACGATGCACCAGAGGGGTGACAATTAGGTTTTCAAGAT  
AGTGAAGTCCTATAGCAGAAGGGATATTAAGAATACATAATGAAATACAATATTATTTA  
TTAATAATTCTAGTATTAATATGTTGGATAATAACTTCAATAATTTTCAAATTCAATGAA  
GAAAGTAATAAATTTAAATCTAAATATATGAATCATGGTACATTAATAGAATTAATTTGA  
ACAATAACACCTGCGTTAATCTTAGTCGCCATAGCTATACCTTCATTTAAATTATTATAT  
TTAATGGATGAAGTAATAGAACCAACCATTACATTACAAATTACCGGTCACCAATGATAT  
TGGTCTACAGAATACTCTGACTATGTAAAACAATCAGGCAATATTGAGTTTGACAGTTAT

ATGATCGCAACCTCGGATTTAGAATTAGGTAAATTAAGATTATTGGAAGTAGATAATAGA  
GTAATATTACCAGTAGACACACATGTCAGAGTAATAGTTACGAGTACCGATGTAATACAC  
TCACTAGCATTACCATCCTTAGGGGTAAAATTGACTGTTGCCCAGGTCGATTAAACCAA  
ACATCTTTTCATAATAAAAAGAGAAGGTGTATTCTACGGACAATGCTCAGAACTTTGCGGA  
CATGCACACGGTTTCATGCCGATAGTAATAGAGGGGGTAACATTAGAGGATTACTTAGTA  
TGGGTAAATGAGTCGGTAGAAGAA**TAG**

>cox2-consensus

**ATG**TGATTAAATTATATAATGAACGATGCACCAGAGGGGTGACAATTAGGTTTTCAAGAT  
AGTGCAAGTCCTATAGCAGAAGGGATATTAAGAATACATAATGAAATACAATATTATTTA  
TTAATAATTCTAGTATTAATATGTTGGATAATAACTTCAATAATTTTCAAATTCAATGAA  
GAAAGTAATAAATTTAAATCTAAATATATGAATCATGGTACATTAATAGAATTAATTTGA  
ACAATAACACCTGCGTTAATCTTAGTCGCCATAGCTATACCTTCATTTAAATTATTATAT  
TTAATGGATGAAGTAATAGAACCAACCATTACATTACAAATTACCGGTCACCAATGATAT  
TGGTCTACAGAATACTCTGACTATGTAAAACAATCAGGCAATATTGAGTTTGACAGTTAT  
ATGATCGCAACCTCGGATTTAGAATTAGGTAAATTAAGATTATTGGAAGTAGATAATAGA  
GTAATATTACCAGTAGACACACATGTCAGAGTAATAGTTACGAGTACCGATGTAATACAC  
TCACTAGCATTACCATCCTTAGGGGTAAAATTGACTGTTGCCCAGGTCGATTAAACCAA  
ACATCTTTTCATAATAAAAAGAGAAGGTGTATTCTACGGACAATGCTCAGAACTTTGCGGA  
CATGCACACGGTTTCATGCCGATAGTAATAGAGGGGGTAACATTAGAGGATTACTTAGTA  
TGGGTAAATGAGTCGGTAGAAGAA**TAG**

>cox3-KVL-14-117

**ATG**AAGTATAACAAACAATCACATCCTTTTTCATTTAGTAGAACCGTCACCTTGACCTTTA  
ACCACTTCGATAGGCTTAGGTATAATGGCGATGGGGGGAGTAATATATTTTACGGGTTTA  
GATAGTATTGTATTAATATTAGGTTTGGTTGTGACGATAATGACAAGTACATTATGGTGG  
AGAGATTGCATTAGAGAGGGTACATTACAAGGTTATCATACAAAAAAGTAAGAAAAGGT  
ATCAATATAGGATTTATATTATTTATAGTCTCTGAAGTATTCTTCTTTTTTTCTATTTTC  
TGGGCCTATTTCCACTCTAGTTTATCACCGTCGGTAGAATTAGGTGGTATGTGGCCGCCA  
ATGGGGATAGAAGCATTAAACCTTTGAGAGCTACCTTTATTAAATACAGTAATATTGTTA  
TCCTCAGGCGCCACAGTGACAACCTGCTCATCATGGATTAATCTATGGGGCGAGACGAATA  
GTAATATTAAGTTTAATAACAACCTTTAATCTTAGCAGTTTTATTTGTAGGGTGCCAAGGA  
TATGAATACTATAATGCACCCTTCAGTTTTTCTGATGGAGCGTATGGATCAACTTTCTTC  
TTTGCAACAGGTTTCCATGGGTTGCACGTAATAATCGGTACGATATTTTTAGCAGTAGCC  
TTTAATAGGGTTATGAATTATGAATTAACATAATCAGCACCACGTTGGTTTTGAATCCGCA  
ATCCTGTATTGACATTTCTAGACATCGTTT**GACT**GTTTTTATTATAGTAATCTACGGT  
**TGAGGGGCGTAA**

>cox3-KVL-14-118

**ATG**AAGTATAACAAACAATCACATCCTTTTTCATTTAGTAGAACCGTCACCTTGACCTTTA  
ACCACTTCGATAGGCTTAGGTATAATGGCGATGGGGGGAGTAATATATTTTACGGGTTTA  
GATAGTATTGTATTAATATTAGGTTTGGTTGTGACGATAATGACAAGTACATTATGGTGG  
AGAGATTGCATTAGAGAGGGTACATTACAAGGTTATCATACAAAAAAGTAAGAAAAGGT  
ATCAATATAGGATTTATATTATTTATAGTCTCTGAAGTATTCTTCTTTTTTTCTATTTTC  
TGGGCCTATTTCCACTCTAGTTTATCACCGTCGGTAGAATTAGGTGGTATGTGGCCGCCA  
ATGGGGATAGAAGCATTAAACCTTTGAGAGCTACCTTTATTAAATACAGTAATATTG**NNN**

>cox2-HHdFL130914-1

## >cox3-Berkeley

>cox3-HHdFL050913-1

ATGAAGTATAACAACAATCACATCCTTTTCATTTAGTAGAACCGTCACCTTGACCTTTA  
ACCACTTCGATAGGCTTAGGTATAATGGCGATGGGGGAGTAATATATTTTACGGGTTTA  
GATAGTATTGTATTAATATTAGGTTTGGTTGTGACGATAATGACAAGTACATTATGGTGG  
AGAGATTGCATTAGAGAGGGTACATTACAAGGTTATCATACAAAAAAGTAAGAAAAGGT  
ATCAATATAGGATTTATATTATTTATAGTCTCTGAAGTATTCTTCTTTTTTTCTATTTTC  
TGGGCCTATTTCCACTCTAGTTTATCACCGTCGGTAGAATTAGGTGGTATGTGGCCGCCA

ATGGGGATAGAAGCATTAAACCTTTGAGAGCTACCTTTATTAAATACAGTAATATTGTTA  
TCCTCAGGCGCCACAGTGACAACCTGCTCATCATGGATTAATCTATGGGGCGAGACGAATA  
GTAATATTAAGTTTAATAACAACCTTTAATCTTAGCAGTTTTATTTGTAGGGTGCCAAGGA  
TATGAATACTATAATGCACCCTTCAGTTTTTCTGATGGAGCGTATGGATCAACTTTCTTC  
TTTGCAACAGGTTTCCATGGGTTGCACGTAATAATCGGTACGATATTTTTAGCAGTAGCC  
TTTAATAGGGTTATGAATTATGAATTAATAATCAGCACCACGTTGGTTTTGAATCCGCA  
ATCCTGTATTGACATTTCTAGACATCGTTTGACTGTTTTTATTTATAGTAATCTACGGT  
TGAGGGGCGTAA

>cox3-consensus

ATGAAGTATAACAAACAATCACATCCTTTTCATTTAGTAGAACCGTCACCTTGACCTTTA  
ACCACTTCGATAGGCTTAGGTATAATGGCGATGGGGGGAGTAATATATTTTACGGGTTTA  
GATAGTATTGTATTAATATTAGGTTTGTTGTGACGATAATGACAAGTACATTATGGTGG  
AGAGATTGCATTAGAGAGGGTACATTACAAGGTTATCATACAAAAAAGTAAGAAAAGGT  
ATCAATATAGGATTTATATTATTTATAGTCTCTGAAGTATTCTTCTTTTTTCTATTTTC  
TGGGCCTATTTCCACTCTAGTTTATCACCGTCGGTAGAATTAGGTGGTATGTGGCCGCCA  
ATGGGGATAGAAGCATTAAACCTTTGAGAGCTACCTTTATTAAATACAGTAATATTGTTA  
TCCTCAGGCGCCACAGTGACAACCTGCTCATCATGGATTAATCTATGGGGCGAGACGAATA  
GTAATATTAAGTTTAATAACAACCTTTAATCTTAGCAGTTTTATTTGTAGGGTGCCAAGGA  
TATGAATACTATAATGCACCCTTCAGTTTTTCTGATGGAGCGTATGGATCAACTTTCTTC  
TTTGCAACAGGTTTCCATGGGTTGCACGTAATAATCGGTACGATATTTTTAGCAGTAGCC  
TTTAATAGGGTTATGAATTATGAATTAATAATCAGCACCACGTTGGTTTTGAATCCGCA  
ATCCTGTATTGACATTTCTAGACATCGTTTGACTGTTTTTATTTATAGTAATCTACGGT  
TGAGGGGCGTAA

>nad1-KVL-14-117

ATGATCGAGATACTCTCATTAATAATTCCTTTATTAGTTTCAATAGCTTATTTAACTTTA  
GCGGAAAGAAAACCTCATGGGTTCAATGCAAAGACGATTAGGTCCAAATAAGGTAGGGATA  
CTAGGTCTATTACAGCCATTTGCCGATGGTTTAAAATTAGTGATAAAAGAAACGATTATC  
GTATCACAAGCTAATAAAATAATCTTTTTCTTGGCTCCCTATATAACATTGGTATTTGGT  
TTCTTGGCTTGAGGTGTCAATTCATTTACTAGAGGGATAATAATAGAGGATATAGGTTAT  
AGTACATTATATATATTATTGATAACGGGGATAGGGGTATTAGGGATAATATTAGCAGGT  
TGGTCAGCTAATTCTAAATATGCAGTATTAGGGTCGTTAAGGACCACCGCCAGTTAATA  
TCTTACGAGGTAGTAATAGGCTTAATGGTAATAATGGTGGTGATNNNNNNNGATGGGTTG  
AGTTTAATATCAATCATAGAAGCACAAAACATATCTGGAATATAATACCAGTATGGCCT  
ATATATATCATATTCATGATATCAGCGATAGCAGAAACAAATCGAGCCCCGATGGACTTA  
CCTGAAGCTGAATCAGAGTTAGTGGCAGGGTTTCAAACCGAGCACTCAGCCTTATCTTTT  
GCTTATTTCTTTTTAGGTGAGTATGGGAATATAATATTAATTTGTACCATCACGGCCAAT  
TTCTTTTGGGGGGTTATAGTATAGGCGGAATTAATTCGGCTTTAATATTAGGCTTAAAA  
GTATCGATGCTTTTATTTGTCTTCATCCTCTGCAGGGCTACTTATCCTAGGCTCAGATTT  
GACCAATTAATGAGTTTAATGTGAACAGGATTATTGCCACTAGTACTAGGGNNNNNNNNN  
NNNNNNNNNNNNNNNNNNNNNNNNNNNNNNNNNNNNNNNNNNNNNNNNNNNNNNNNNNNN

>nad1-KVL-14-118

ATGATCGAGATACTCTCATTAATAATTCCTTTATTAGTTTCAATAGCTTATTTAACTTTA  
GCGGAAAGAAAACCTCATGGGTTCAATGCAAAGACGATTAGGTCCAAATAAGGTAGGGATA



TTCTTTTGGGGGGTTATAGTATAGGCGGAATTAATTTCGGCTTTAATATTAGGCTTAAAA  
GTATCGATGCTTTTATTTGTCTTCATCCTCTGCAGGGCTACTTATCCTAGGCTCAGATTT  
GACCAATTAATGAGTTTAATGTGAACAGGATTATTGCCACTAGTACTAGGGTATTTTGTA  
TTAATCTCTAGTATAATGGTTATTATTACCAACTGGTAG

>nad1-HHdFL050913-1

ATGATCGAGATACTCTCATTAATAATTCCTTTATTAGTTTCAATAGCTTATTTAACTTTA  
GCGGAAAGAAAACCTCATGGGTTCATGCAAAGACGATTAGGTCCAAATAAGGTAGGGATA  
CTAGGTCTATTACAGCCATTTGCCGATGGTTTAAAATTAGTGATAAAAGAAACGATTATC  
GTATCACAAGCTAATAAAATAATCTTTTTCTTGGCTCCCTATATAACATTGGTATTTGGT  
TTCTTGGCTTGAGGTGTCATTCCATNNNNNNNNNNNNNNNNNNNNNNNNNNNNNNNNNNNN  
NNNNNNNNNNNTATATTATTGATAACGGGGATAGGGGTATTAGGGATAATATTAGCAGGT  
TGGTCAGCTAATTCTAAATATGCAGTATTAGGGTCGTTAAGGACCACCGCCAGTTAATA  
TCTTACGAGGTAGTAATAGGCTTAATGGTAATAATGGTGGTGATGCTAAGTGATGGGTTG  
AGTTTAATATCAATCATAGAAGCACAAAACATATCTGGAATATAATACCAGTATGGCCT  
ATATATATCATATTCATGATATCAGCGATAGCAGAAACAAATCGAGCCCCGATGGACTTA  
CCTGAAGCTGAATCAGAGTTAGTGGCAGGTTTTCAAACCGAGCACTCAGCCTTATCTTTT  
GCTTATTTCTTTTTAGGTGAGTATGGGAATATAATATTAATTTGTACCATCACGGCCAAT  
TTCTTTTGGGGGGTTATAGTATAGGCGGAATTAATTTCGGCTTTAATATTAGGCTTAAAA  
GTATCGATGCTTTTATTTGTCTTCATCCTCTGCAGGGCTACTTATCCTAGGCTCAGATTT  
GACCAATTAATGAGTTTAATGTGAACAGGATTATTGCCACTAGTACTAGGGTATTTTGTA  
TTAATCTCTAGTATAATGGTTATTATTACCAACTGGTAG

>nad1-consensus

ATGATCGAGATACTCTCATTAATAATTCCTTTATTAGTTTCAATAGCTTATTTAACTTTA  
GCGGAAAGAAAACCTCATGGGTTCATGCAAAGACGATTAGGTCCAAATAAGGTAGGGATA  
CTAGGTCTATTACAGCCATTTGCCGATGGTTTAAAATTAGTGATAAAAGAAACGATTATC  
GTATCACAAGCTAATAAAATAATCTTTTTCTTGGCTCCCTATATAACATTGGTATTTGGT  
TTCTTGGCTTGAGGTGTCATTCCATTTACTAGAGGGATAATAATAGAGGATATAGGTTAT  
AGTACATTATATATATTATTGATAACGGGGATAGGGGTATTAGGGATAATATTAGCAGGT  
TGGTCAGCTAATTCTAAATATGCAGTATTAGGGTCGTTAAGGACCACCGCCAGTTAATA  
TCTTACGAGGTAGTAATAGGCTTAATGGTAATAATGGTGGTGATGCTAAGTGATGGGTTG  
AGTTTAATATCAATCATAGAAGCACAAAACATATCTGGAATATAATACCAGTATGGCCT  
ATATATATCATATTCATGATATCAGCGATAGCAGAAACAAATCGAGCCCCGATGGACTTA  
CCTGAAGCTGAATCAGAGTTAGTGGCAGGTTTTCAAACCGAGCACTCAGCCTTATCTTTT  
GCTTATTTCTTTTTAGGTGAGTATGGGAATATAATATTAATTTGTACCATCACGGCCAAT  
TTCTTTTGGGGGGTTATAGTATAGGCGGAATTAATTTCGGCTTTAATATTAGGCTTAAAA  
GTATCGATGCTTTTATTTGTCTTCATCCTCTGCAGGGCTACTTATCCTAGGCTCAGATTT  
GACCAATTAATGAGTTTAATGTGAACAGGATTATTGCCACTAGTACTAGGGTATTTTGTA  
TTAATCTCTAGTATAATGGTTATTATTACCAACTGGTAG

>nad2-KVL-14-117

ATGTTAACTTTAAGTATAATAATATTAATAACAAGTTTAGGGAGATGAATAAATATAAAT  
AGAATGACGATGATAGTATTTTATATATTCAGGAATTTTAAGTATAAATATGACGGGGGAG  
AGCAATAGCGCCATAGGGTGTTCCGATATGGGGATGATAAATTCAGGGATAGGGCTATAT  
AATGGATTATATCAAGTGACACCAATAACTCAATTCATAGAACTTATATAAATATATTA



GCGGTAGGCTGTATGGCGATGAAGGCTAGGAGTGAATATAGTATATTAGCCTTAATAGTG  
ACGGTAGGGATGAGTAGTTTAATAAGTAGTAATGAGATAGTTAGTATATTAATAGGGATA  
GAGTTACAGACATTAGGATTATATGTCATAGCCAGTCTAGATAGAGGTTTACAGAGACCTCG  
ACGGCAGCGGGGTTAAAATATTATTTATTAGGGGGTTTATCGTCATGTATAATAGGTTTA  
GGTTTGAGTATGATATATGGGATAACAGGGGTGACAAATATAGAGGAGTTAAATATATTA  
ATAAAAATAAATGACGACAGCCGTCATCTAATAATGACGAAGGTATTAATTACAGTAGGA  
TTATTATTTAAAATAGGAGCAGCTCCCTTTTATAATTGGTTAGCGGATGTAATAGATGGA  
GTACCGACTGCGATATCGGCATGGTTAGCGGTGGTATCAAAGATATCAATAATAATA  
TTATTAATATTATATAATGCTATATTAATAAAAAATAAACACCAGTGGTGGTGGTCCGATA  
ATAATATTAAGTATAATATTATGCTTTATAGTAGGAAGTTTAGTAGGGATAATACAATCT  
AGGATAAAAAACATTATTAGCTTATAGTAGTATAGCCCATGCGGGGTATATATTAATAGGG  
ATAATAGTAAATAATAATCTAGGATTAACAGGTTTAATATTTTATATGGTACAATATTCT  
TTAACGGCATTAAATATATTTATGATAATAATAGCCTATGGTGAGGTAAAAGGGGCATCG  
ATAGTAAAAATATCACAATTAAGAAATCCCTAACACGTGATTAGCGATAAGTTTAGCG  
ATAAGTTTATTTTCATCTGCAGGGATTCCACCGTTTATAGGATTTTATGCCAACTTAAT  
ATATTATACTCGGCTCTAGATACAGGTTTTTACTTCATAACAATAATCGCCATACTAACC  
AGTATAATAAGTGTTATTATTATATAAAAGTAATAAAAGTAATATATTTTGAGGGGGAG  
TGATGTAGGGTTGGAACCGCCAATGAAGTACGGGGGGCGATATCAGAAAATTATTCAATA  
ATAATAGCCATGATAAGTTTAGTGATAATATTATTCATCCTCAGTCCCGAGTGACTATAT  
AATAGTATTCAGATGATATGCTAG

>nad2-KVL-14-118

ATGTTAACYTAAAGTATAATAATATTAATAACAAGTTTAGGGAGATGAATAAATATAAAT  
AGAATGACGATGATAGTATTTATATATTCAGGAATTTTAAGTATAAATATGACGGGGGAG  
AGCAATAGCGCCATAGGGTGTTCCGATATGGGGATGATAAATTCAGGGATAGGGCTATAT  
AATGGATTATATCAAGTGACACCAATAACTCAATTCATAGAACTTATATAAATATATTA  
GCGGTAGGCTGTATGGCGATGAAGGCTAGGAGTGAATATAGTATATTAGCCTTAATAGTG  
ACGGTAGGGATGAGTAGTTTAATAAGTAGTAATGAGATAGTTAGTATATTAATAGGGATA  
GAGTTACAGACATTAGGATTATATGTCATAGCCAGTCTAGATAGAGGTTTACAGAGACCTCG  
ACGGCAGCGGGGTTAAAATATTATTTATTAGGGGGTTTATCGTCATGTATAATAGGTTTA  
GGTTTGAGTATGATATATGGGATAACAGGGGTGACAAATATAGAGGAGTTAAATATATTA  
ATAAAAATAAATGACGACAGCCGTCATCTAATAATGACGAAGGTATTAATTACAGTAGGA  
TTATTATTTAAAATAGGAGCAGCTCCCTTTTATAATTGGTTAGCGGATGTAATAGATGGA  
GTACCGACTGCGATATCGGCATGGTTAGCGGNNNNNNNNNNNNNNNNNNNTAATAATAATA  
TTATTAATATTATATAATGCTATATTAATAAAAAATAAACACCAGTGGTGGTGGTCCGATA  
ATAATATTAAGTATAATATTATGCTTTATAGTAGGAAGTTTAGTAGGGATAATACAATCT  
AGGATAAAAAACATTATTAGCTTATAGTAGTATAGCCCATGCGGGGTATATATTAATAGGG  
ATAATAGTAAATAATAATCTAGGATTAACAGGTTTAATATTTTATATGGTACAATATTCT  
TTAACGGCATTAAATATATTTATGATAATAATAGCCTATGGTGAGGTAAAAGGGGCATCG  
ATAGTAAAAATATCACAATTAAGAAATCCCTAACACGTGATTAGCGATAAGTTTAGCG  
ATAAGTTTATTTTCATCTGCAGGGATTCCACCGTTTATAGGATTTTATGCCAACTTAAT  
ATATTATACTCGGCTCTAGATACAGGTTTTTACTTCATAACAATAATCGCCATACTAACC  
AGTATAATAAGTGTTATTATTATATAAAAGTAATAAAAGTAATATATTTTGAGGGGGAG  
TGATGTAGGGTTGGAACCGCCAATGAAGTACGGGGGGCGATATCAGAAAATTATTCAATA  
ATAATAGCCATGATAAGTTTAGTGATAATATTATTCATCCTCAGTCCCGAGTGACTATAT

AATAGTATTCAGATGATATGC**TAG**

>nad2-HHdFL130914-1

**ATG**TTAACTTTAAGTATAATAATATTAATAACAAGTTTAGGGAGATGAATAAATATAAAT  
AGAATGACGATGATAGTATTTATATATTCAGGAATTTTAAGTATAAATATGACGGGGGAG  
AGCAATAGCGCCATAGGGTGTTCGGATATGGGGATGATAAATTCAGGGATAGGGCTATAT  
AATGGATTATATCAAGTGACACCAATAACTCAATTCATAGAACTTATATAAATATATTA  
GCGGTAGGCTGTATGGCGATGAAGGCTAGGAGTGAATATAGTATATTAGCCTTAATAGTG  
ACGGTAGGGATGAGTAGTTTAATAAGTAGTAATGAGATAGTTAGTATATTAATAGGGATA  
GAGTTACAGACATTAGGATTATATGTCATAGCCAGTCTAGATAGAGGTTTCAGAGACCTCG  
ACGGCAGCGGGGTTAAAATATTATTTATTAGGGGGTTTATCGTCATGTATAATAGGTTTA  
GGTTTGAGTATGATATATGGGATAACAGGGGTGACAAATATAGAGGAGTTAAATATATTA  
ATAAAAATAAATGACGACAGCCGTCATCTAATAATGACGAAGGTATTAATTACAGTAGGA  
TTATTATTTAAAATAGGAGCAGCTCCCTTTCATAATTGGTTAGCGGATGTAATAGATGGA  
GTACCGACTGCGATATCGGCATGGTTAGCGGTGGTATCAAAGATATCAATAATAATAATA  
TTATTAATATTATATAATGCTATATTAATAAAAAATAAACACCAGTGGTGGTGGTCCGATA  
ATAATATTAAGTATAATATTATGCTTTATAGTAGGAAGTTTAGTAGGGATAATACAATCC  
AGGATAAAAAACATTATTAGCTTATAGTAGTATAGCCCATGCGGTGTATATATTAATAGGG  
ATAATAGTAAATAATAATCTAGGATTAACAGGTTTAATATTTTATATGGTACAATATTCT  
TTAACGGCATTAAATATATTTATGATAATAATAGCCTATGGTGAGGTAAAAGGGGCATCG  
ATAGTAAAAATATCACAATTAAGAAATCCCTAACACGTGATTAGCGATAAGTTTAGCG  
ATAAGTTTATTTTCATCTGCAGGGATTCCACCGTTTATAGGATTTTATGCCAACTTAAT  
ATATTATACTCGGCTCTAGATACAGGTTTTTACTTCATAACAATAATCGCCATACTAACC  
AGTATAATAAGTGGTTATTATTATATAAAAGTAATAAAAGTAATATATTTTGAGGGGGAG  
TGATGTAGGGTTGGAACCGCCAATGAAGTACGGGGGGCGATATCAGAAAATTATTCAATA  
ATAATAGCCATGATAAGTTTAGTGATAATATTATTCATCCTCAGTCCCGAGTGACTATAT  
AATAGTATTCAGATGATATGC**TAG**

>nad2-Berkeley

**ATG**TTAACTTTAAGTATAATAATATTAATAACAAGTTTAGGGAGATGAATAAATATAAAT  
AGAATGACGATGATAGTATTTATATATTCAGGAATTTTAAGTATAAATATGACGGGGGAG  
AGCAATAGCGCCATAGGGTGTTCGGATATGGGGATGATAAATTCAGGGATAGGGCTATAT  
AATGGATTATATCAAGTGACACCAATAACTCAATTCATAGAACTTATATAAATATATTA  
GCGGTAGGCTGTATGGCGATGAAGGCTAGGAGTGAATATAGTATATTAGCCTTAATAGTG  
ACGGTAGGGATGAGTAGTTTAATAAGTAGTAATGAGATAGTTAGTATATTAATAGGGATA  
GAGTTACAGACATTAGGATTATATGTCATAGCCAGTCTAGATAGAGGTTTCAGAGACCTCG  
ACGGCAGCGGGGTTAAAATATTATTTATTAGGGGGTTTATCGTCATGTATAATAGGTTTA  
GGTTTGAGTATGATATATGGGATAACAGGGGTGACAAATATAGAGGAGTTAAATATATTA  
ATAAAAATAAATGACGACAGCCGTCATCTAATAATGACGAAGGTATTAATTACAGTAGGA  
TTATTATTTAAAATAGGAGCAGCTCCCTTTCATAATTGGTTAGCGGATGTAATAGATGGA  
GTACCGACTGCGATATCGGCATGGTTAGCGGTGGTATCAAAGATATCAATAATAATAATA  
TTATTAATATTATATAATGCTATATTAATAAAAAATAAACACCAGTGGTGGTGGTCCGATA  
ATAATATTAAGTATAATATTATGCTTTATAGTAGGAAGTTTAGTAGGGATAATACAATCT  
AGGATAAAAAACATTATTAGCTTATAGTAGTATAGCCCATGCGGGGTATATATTAATAGGG  
ATAATAGTAAATAATAATCTAGGATTAACAGGTTTAATATTTTATATGGTACAATATTCT  
TTAACGGCATTAAATATATTTATGATAATAATAGCCTATGGTGAGGTAAAAGGGGCATCG

>nad2-HHdFL050913-1

```
>nad2-consensus
```

**ATG**TTAAC TTTAAGTATAATAATATTAATAACAAGTTTAGGGAGATGAATAAATATAAAT  
AGAATGACGATGATAGTATTTATATATTTCAGGAATTTTAAGTATAAATATGACGGGGGAG  
AGCAATAGCGCCATAGGGTGTTCCGATATGGGGATGATAAATTCAGGGATAGGGCTATAT  
AATGGATTATATCAAGTGACACCAATAACTCAATTCATAGAACTTATATAAATATATTA  
GCGGTAGGCTGTATGGCGATGAAGGCTAGGAGTGAATATAGTATATTAGCCTTAATAGTG  
ACGGTAGGGATGAGTAGTTTAATAAGTAGTAATGAGATAGTTAGTATATTAATAGGGATA  
GAGTTACAGACATTAGGATTATATGTCATAGCCAGTCTAGATAGAGGTTTACAGAGACCTCG  
ACGGCAGCGGGGTAAAATATTATTTATTAGGGGGTTTATCGTCATGTATAATAGGTTTA  
GGTTTGAGTATGATATATGGGATAACAGGGGTGACAAATATAGAGGAGTTAAATATATTA  
ATAAAAATAAATGACGACAGCCGTATCTAATAATGACGAAGGTATTAATTACAGTAGGA  
TTATTATTTAAAATAGGAGCAGCTCCCTTTCATAATTGGTTAGCGGATGTAATAGATGGA

GTACCGACTGCGATATCGGCATGGTTAGCGGTGGTATCAAAGATATCAATAATAATAATA  
TTATTAATATTATATAATGCTATATTAATAAAAAATAAACACCAGTGGTGGTGGTCCGATA  
ATAATATTAAGTATAATATTATGCTTTATAGTAGGAAGTTTAGTAGGGATAATACAATCT  
AGGATAAAAAACATTATTAGCTTATAGTAGTATAGCCCATGCGGGGTATATATTAATAGGG  
ATAATAGTAAATAATAATCTAGGATTAACAGGTTTAATATTTTATATGGTACAATATTCT  
TTAACGGCATTAAATATATTTATGATAATAATAGCCTATGGTGAGGTAAAAGGGGCATCG  
ATAGTAAAAATATCACAATTAAGAAATCCCTAACACGTGATTAGCGATAAGTTTAGCG  
ATAAGTTTATTTTCATCTGCAGGGATTCCACCGTTTATAGGATTTTATGCCAACTTAAT  
ATATTATACTCGGCTCTAGATACAGGTTTTTACTTCATAACAATAATCGCCATACTAACC  
AGTATAATAAGTGGTTATTATTATATAAAAGTAATAAAAGTAATATATTTTGAGGGGGAG  
TGATGTAGGGTTGGAACCGCCAATGAAGTACGGGGGGCGATATCAGAAAATTATTCAATA  
ATAATAGCCATGATAAGTTTAGTGATAATATTATTCATCCTCAGTCCCGAGTGACTATAT  
AATAGTATTCAGATGATATGC**TAG**

>nad3-KVL-14-117

**ATG**AATAATTTATTTATCTTAATAATCTCAGCCACCGCCATTGTATTCTTATTATTATTT  
GTCAATCTTATTGTCTGGGGATAAAAAACCTTATACTAATAAATTATCTCCCTATGAATGT  
GGTTTAATGCCTTTAGGTGAAGGGGAGAGCTAGCTTAAATATACAATATATTTTAGTGGCT  
ATTTTATTTATAATATTTGATATTGAGGTAATAGTATTATTTCCATATGCAGTGACTATA  
AATAATATATACACATACTGGATAATGATTATCTTTATCATCATTTTAACCATAGGGTTT  
TACTTTGAAATTAGTCAAGGGGCTTTAAATATGTCTGATGAAGAGGTT**TAG**

>nad3-KVL-14-118

**ATG**AATAATTTATTTATCTTAATAATCTCAGCCACCGCCATTGTATTCTTATTATTATTT  
GTCAATCTTATTGTCTGGGGATAAAAAACCTTATACTAATAAATTATCTCCCTATGAATGT  
GGTTTAATGCCTTTAGGTGAAGGGGAGAGCTAGCTTAAATATACAATATATTTTAGTGGCT  
ATTTTATTTATAATATTTGATATTGAGGTAATAGTATTATTTCCATATGCAGTGACTATA  
AATAATATATACACATACTGGATAATGATTATCTTTATCATCATTTTAACCATAGGGTTT  
TACTTTGAAATTAGTCAAGGGGCTTTAAATATGTCTGATGAAGAGGTT**TAG**

>nad3-HHdFL130914-1

**ATG**AATAATTTATTTATCTTAATAATCTCAGCCACCGCCATTGTATTCTTATTATTATTT  
GTCAATCTTATTGTCTGGGGATAAAAAACCTTATACTAATAAATTATCTCCCTATGAATGT  
GGTTTAATGCCTTTAGGTGAAGGGGAGAGCTAGCTTAAATATACAATATATTTTAGTGGCT  
ATTTTATTTATAATATTTGATATTGAGGTAATAGTATTATTTCCATATGCAGTGACTATA  
AATAATATATACACATACTGGATAATGATTATCTTTATCATCATTTTAACCATAGGGTTT  
TACTTTGAAATTAGTCAAGGGGCTTTAAATATGTCTGATGAAGAGGTT**TAG**

>nad3-Berkeley

**ATG**AATAATTTATTTATCTTAATAATCTCAGCCACCGCCATTGTATTCTTATTATTATTT  
GTCAATCTTATTGTCTGGGGATAAAAAACCTTATACTAATAAATTATCTCCCTATGAATGT  
GGTTTAATGCCTTTAGGTGAAGGGGAGAGCTAGCTTAAATATACAATATATTTTAGTGGCT  
ATTTTATTTATAATATTTGATATTGAGGTAATAGTATTATTTCCATATGCAGTGACTATA  
AATAATATATACACATACTGGATAATGATTATCTTTATCATCATTTTAACCATAGGGTTT  
TACTTTGAAATTAGTCAAGGGGCTTTAAATATGTCTGATGAAGAGGTT**TAG**

>nad3-HHdFL050913-1

**ATG**AATAATTTATTTATCTTAATAATCTCAGCCACCGCCATTGTATTCTTATTATTATTT

GTCAATCTTATTGTCGGGGATAAAAAACCTTATACTAATAAATTATCTCCCTATGAATGT  
GGTTTAATGCCTTTAGGTGAAGGGAGAGCTAGCTTAAATATACAATATATTTTAGTGGCT  
ATTTTATTTATAATATTTGATATTGAGGTAATAGTATTATTTCCATATGCAGTGACTATA  
AATAATATATACACATACTGGATAATGATTATCTTTATCATCATTTTAACCATAGGGTTT  
TACTTTGAAATTAGTCAAGGGGCTTTAAAATATGTCGATGAAGAGGTTTAG

>nad3-consensus

ATGAATAATTTATTTATCTTAATAATCTCAGCCACCGCCATTGTATTCTTATTATTATTT  
GTCAATCTTATTGTCGGGGATAAAAAACCTTATACTAATAAATTATCTCCCTATGAATGT  
GGTTTAATGCCTTTAGGTGAAGGGAGAGCTAGCTTAAATATACAATATATTTTAGTGGCT  
ATTTTATTTATAATATTTGATATTGAGGTAATAGTATTATTTCCATATGCAGTGACTATA  
AATAATATATACACATACTGGATAATGATTATCTTTATCATCATTTTAACCATAGGGTTT  
TACTTTGAAATTAGTCAAGGGGCTTTAAAATATGTCGATGAAGAGGTTTAG

>nad4-KVL-14-117

ATGTTAAGTATAATAGCAATAATACCCTTGATAGGTTTATGAATAATAATGATGAGCAGA  
GATGAAAAACAGTATAAAATTATTGGATTAGTAACATCATTACTAACTTAGTAATATAT  
CCAATAATATGGGCGCAACACAATTCAAATAATAATTACTTTCAGATTATAGAGAAAACG  
TCTTCACCCCTTGACACTTATTATCCAGAAATAATCGGGGTAGATAGTATATCATTATAT  
ATGATAGGGATAACAATAATATTAATACCAATATGTATATTATCAACGTGATCGAGTGTG  
AAAAAGGAAGTAAAGTTATATATAGGATTATGATTAGTATTAGAAACCGTCTTAATATTA  
GTATTTCTATGAATAGACATACTATTATTTTATATAACCTTTGAAACAAGTTAATACCA  
ATGTATTTAATAATAGGGATATATGGGGGTAAAAAAGGAAGATATATGCAGCATACCAA  
TTTTTCTTAATAACATTATTAGGCTCATTATTGATGTTAATGGGGATAATAATGTTATAT  
TCACAAATAGGGGTAACAGATTATCAAATATACACATTAACAGTGGAGCTAACAAAAGAA  
AGAGAAAAAATAATATGGTTAGCTTTATTTATATCATTTGCGGTGAAAACACCATTAGTA  
CCGGTTCATATTTGGTTACCTGAAGCTCATAGTGAAGCAAATATAGCCGGTTCATAATA  
TTAGCGGTGTATTATTAATAATTAGCCGGCTATGGCTTTCTGAGATATTCACTGAATATA  
TTACCTGAGGCATCAAGATATTATATTCCCTTAGTATATGGTTTATCTATAATAAGTATC  
ATTTATTGTAGTTTAACCACATTAAGACAAATAGATATGAAAAAATCATAGCATATTCA  
TCCATAGGTCATATGGGGATAGTAATATTAGGTATATTTTCCAATACGATGGAGGGGCTA  
GAGGGGTGATGATATTAATGATAGGTCATGGATTGGTATCACCGGGGTATTATTAATA  
GTAACGATATTATATGAAAGATATCATAGTGAATAATAAAATATTATAGGGGGGTGACG  
TCGACAAGTCCATTAATAGCGATATTATTTATAATATATACCTTAGCCAATATGGGTGTA  
CCTTTATCGAGTAATTTTATAGGGGAAATATTATGTTTAATGGGTGCTTGGGAAACCAAT  
CCGATATCGACGATAATAGCGTCAACCGGGTAAATATTAGGGGGGGCTTATAGTATATGG  
TTTTATAATAGAATAAGCTTTGGGGAACCCTCAATATATTATAGGGAGCTAGATATAAAC  
CGAAGGGAGTTTGAAGAACTATTACCTCTATTAATATTGATAATAATCATAGGTGTGTTT  
CCGAATCTGATATTAGACACTTTACATACAGCGGTGAGTAATATATTTTGGGCCGCCGGG  
TAG

>nad4-KVL-14-118

ATGTTAAGTATAATAGCAATAATACCCTTGATAGGTTTATGAATAATAATGATGAGCAGA  
GATGAAAAACAGTATAAAATTATTGGATTAGTAACATCATTACTAACTTAGTAATATAT  
CCAATAATATGGGCGCAACACAATTCAAATAATAATTACTTTCAGATTATAGAGAAAACG  
TCTTCACCCCTTGACACTTATTATCCAGAAATAATCGGGGTAGATAGTATATCATTATAT

ATGATAGGGATAACAATAATATTAATACCAATATGTATATTATCAACGTGATCGAGTGTG  
AAAAAGGAAGTAAAGTTATATATAGGATTATGATTAGTATTAGAAACCGTCTTAATATTA  
GTATTTCTATGAATAGACATACTATTATTTTATATAACCTTTGAAACAAGTTTAATACCA  
ATGTATTTAATAATAGGGATATATGGGGGTAAAAAAGGAAGATATATGCAGCATACCAA  
TTTTTCTTAATAACATTATTAGGCTCATTATTGATGTTAATGGGGATAATAATGTTATAT  
TCACAAATAGGGGTAACAGATTATCAAATATACACATTAACAGTGGAGCTAACAAAAGAA  
AGAGAAAAAATAATATGGTTAGCTTTATTTATATCATTTGCGGTGAAAACACCATTAGTA  
CCGGTTCATATTTGGTTACCTGAAGCTCATAGTGAAGCAAATATAGCCGGTTCATAATA  
TTAGCGGGTGTATTATTAATAATTAGCCGGCTATGGCTTTCTGAGATATTCACTGAATATA  
TTACCTGAGGCATCAAGATATTATATTCCCTTAGTATATGGTTTATCTATAATAAGTATC  
ATTTATTGTAGTTTAACCACATTAAGACAAATAGATATGAAAAAATCATAGCATATTCA  
TCCATAGGTCATATGGGGATAGTAATATTAGGTATATTTTCCAATACGATGGAGGGGCTA  
GAGGGGTGATGATATTAATGATAGGTCATGGATTGGTATCACCGGGGTATTATTAATA  
GTAACGATATTATATGAAAGATATCATAGTCGAATAATAAAATATTATAGGGGGGTGACG  
TCGACAAGTCCATTAATAGCGATATTATTTATAATATATACCTTAGCCAATATGGGTGTA  
CCTTTATCGAGTAATTTTATAGGGGAAATATTATGTTTAATGGGTGCTTGGGAAACCAAT  
CCGATATCGACGATAATAGCGTCAACCGGGTAAATATTAGGGGGGGCTTATAGTATATGG  
TTTTATAATAGAATAAGCTTTGGGGAACCCTCAATATATTATAGGGAGCTAGATATAAAC  
CGAAGGGAGTTTGAAGAACTATTACCTCTATTAATATTGATAATAATCATAGGTGTGTTT  
CCGAATCTGATATTAGACACTTTACATACAGCGGTGAGTAATATATTTTGGGCCGCCGGG

**TAG**

>nad4-HHdFL130914-1

**ATG**TTAAGTATAATAGCAATAATACCCTTGATAGGTTTATGAATAATAATGATGAGCAGA  
GATGAAAAACAGTATAAAATTATTGGATTAGTAACATCATTACTAACTTAGTAATATAT  
CCAATAATATGGGCGCAACACAATTCAAATAATAATTACTTTTCAGATTATAGAGAAAACG  
TCTTCACCCCTTGACACTTATTATCCAGAAATAATCGGGGTAGATAGTATATCATTATAT  
ATGATAGGGATAACAATAATATTAATACCAATATGTATATTATCAACGTGATCGAGTGTG  
AAAAAGGAAGTAAAGTTATATATAGGATTATGATTAGTATTAGAAACCGTCTTAATATTA  
GTATTTCTATGAATAGACATACTATTATTTTATATAACCTTTGAAACAAGTTTAATACCA  
ATGTATTTAATAATAGGGATATATGGGGGTAAAAAAGGAAGATATATGCAGCATACCAA  
TTTTTCTTAATAACATTATTAGGCTCATTATTGATGTTAATGGGGATAATAATGTTATAT  
TCACAAATAGGGGTAACAGATTATCAAATATACACATTAACAGTGGAGCTAACAAAAGAA  
AGAGAAAAAATAATATGGTTAGCTTTATTTATATCATTTGCGGTGAAAACACCATTAGTA  
CCGGTTCATATTTGGTTACCTGAAGCTCATAGTGAAGCAAATATAGCCGGTTCATAATA  
TTAGCGGGTGTATTATTAATAATTAGCCGGCTATGGCTTTCTGAGATATTCACTGAATATA  
TTACCTGAGGCATCAAGATATTATATTCCCTTAGTATATGGTTTATCTATAATAAGTATC  
ATTTATTGTAGTTTAACCACATTAAGACAAATAGATATGAAAAAATCATAGCATATTCA  
TCCATAGGTCATATGGGGATAGTAATATTAGGTATATTTTCCAATACGATGGAGGGGCTA  
GAGGGGTGATGATATTAATGATAGGTCATGGATTGGTATCACCGGGGTATTATTAATA  
GTAACGATATTATATGAAAGATATCATAGTCGAATAATAAAATATTATAGGGGGGTGACG  
TCGACAAGTCCATTAATAGCGATATTATTTATAATATATACCTTAGCCAATATGGGTGTA  
CCTTTATCGAGTAATTTTATAGGGGAAATATTATGTTTAATGGGTGCTTGGGAAACCAAT  
CCGATATCGACGATAATAGCGTCAACCGGGTAAATATTAGGGGGGGCTTATAGTATATGG  
TTTTATAATAGAATAAGCTTTGGGGAACCCTCAATATATTATAGGGAGCTAGATATAAAC

CGAAGGGAGTTTGAAGAACTATTACCTCTATTAATATTGATAATAATCATAGGTGTGTTT  
CCGAATCTGATATTAGACACTTTACATACAGCGGTGAGTAATATATTTTGGGCCGCCGGG  
**TAG**

>nad4-Berkeley

**ATG**TTAAGTATAATAGCAATAATACCCTTGATAGGTTTATGAATAATAATGATGAGCAGA  
GATGAAAAACAGTATAAAATTATTGGATTAGTAACATCATTACTAACTTAGTAATATAT  
CCAATAATATGGGCGCAACACAATTCAAATAATAATTACTTTTCAGATTATAGAGAAAACG  
TCTTCACCCCTTGACACTTATTATCCAGAAATAATCGGGGTAGATAGTATATCATTATAT  
ATGATAGGGATAACAATAATATTAATACCAATATGTATATTATCAACGTGATCGAGTGTG  
AAAAAGGAAGTAAAGTTATATATAGGATTATGATTAGTATTAGAAACCGTCTTAATATTA  
GTATTTCTATGAATAGACATACTATTATTTTATATAACCTTTGAAACAAGTTTAATACCA  
ATGTATTTAATAATAGGGATATATGGGGGTAAAAAAGGAAGATATATGCAGCATACCAA  
TTTTTCTTAATAACATTATTAGGCTCATTATTGATGTTAATGGGGATAATAATGTTATAT  
TCACAAATAGGGGTAAACAGATTATCAAATATACACATTAACAGTGGAGCTAACAAAAGAA  
AGAGAAAAAATAATATGGTTAGCTTTATTTATATCATTTGCGGTGAAAACACCATTAGTA  
CCGGTTCATATTTGGTTACCTGAAGCTCATAGTGAAGCAAATATAGCCGGTTCAATAATA  
TTAGCGGGTGTATTATTAATAATTAGCCGGCTATGGCTTTCTGAGATATTCACTGAATATA  
TTACCTGAGGCATCAAGATATTATATTCCCTTAGTATATGGTTTATCTATAATAAGTATC  
ATTTATTGTAGTTTAACCACATTAAGACAAATAGATATGAAAAAATCATAGCATATTCA  
TCCATAGGTCATATGGGGATAGTAATATTAGGTATATTTTCCAATACGATGGAGGGGCTA  
GAGGGGTGCGATGATATTAATGATAGGTCATGGATTGGTATCACCGGGGTATTATATAATA  
GTAACGATATTATATGAAAGATATCATAGTCGAATAATAAAATATTATAGGGGGGTGACG  
TCGACAAGTCCATTAATAGCGATATTATTTATAATATATACCTTAGCCAATATGGGTGTA  
CCTTTATCGAGTAATTTTATAGGGGAAATATTATGTTTAATGGGTGCTTGGGAAACCAAT  
CCGATATCGACGATAATAGCGTCAACCGGGTAAATATTAGGGGGGGCTTATAGTATATGG  
TTTTATAATAGAATAAGCTTTGGGGAACCCTCAATATATTATAGGGAGCTAGATATAAAC  
CGAAGGGAGTTTGAAGAACTATTACCTCTATTAATATTGATAATAATCATAGGTGTGTTT  
CCGAATCTGATATTAGACACTTTACATACAGCGGTGAGTAATATATTTTGGGCCGCCGGG  
**TAG**

>nad4-HHdFL050913-1

**ATG**TTAAGTATAATAGCAATAATACCCTTGATAGGTTTATGAATAATAATGATGAGCAGA  
GATGAAAAACAGTATAAAATTATTGGATTAGTAACATCATTACTAACTTAGTAATATAT  
CCAATAATATGGGCGCAACACAATTCAAATAATAATTACTTTTCAGATTATAGAGAAAACG  
TCTTCACCCCTTGACACTTATTATCCAGAAATAATCGGGGTAGATAGTATATCATTATAT  
ATGATAGGGATAACAATAATATTAATACCAATATGTATATTATCAACGTGATCGAGTGTG  
AAAAAGGAAGTAAAGTTATATATAGGATTATGATTAGTATTAGAAACCGTCTTAATATTA  
GTATTTCTATGAATAGACATACTATTATTTTATATAACCTTTGAAACAAGTTTAATACCA  
ATGTATTTAATAATAGGGATATATGGGGGTAAAAAAGGAAGATATATGCAGCATACCAA  
TTTTTCTTAATAACATTATTAGGCTCATTATTGATGTTAATGGGGATAATAATGTTATAT  
TCACAAATAGGGGTAAACAGATTATCAAATATACACATTAACAGTGGAGCTAACAAAAGAA  
AGAGAAAAAATAATATGGTTAGCTTTATTTATATCATTTGCGGTGAAAACACCATTAGTA  
CCGGTTCATATTTGGTTACCTGAAGCTCATAGTGAAGCAAATATAGCCGGTTCAATAATA  
TTAGCGGGTGTATTATTAATAATTAGCCGGCTATGGCTTTCTGAGATATTCACTGAATATA  
TTACCTGAGGCATCAAGATATTATATTCCCTTAGTATATGGTTTATCTATAATAAGTATC

ATTTATTGTAGTTTAACCACTTAAGACAAATAGATATGAAAAAATCATAGCATATTCA  
TCCATAGGTCATATGGGGATAGTAATATTAGGTATATTTTCCAATACGATGGAGGGGCTA  
GAGGGTTCGATGATATTAATGATAGGTCATGGATTGGTATCACCGGGGTATTTATAATA  
GTAACGATATTATATGAAAGATATCATAGTCGAATAATAAAATATTATAGGGGGTGACG  
TCGACAAGTCCATTAATAGCGATATTATTTATAATATATACCTTAGCCAATATGGGTGTA  
CCTTTATCGAGTAATTTTATAGGGGAAATATTATGTTTAATGGGTGCTTGGGAAACCAAT  
CCGATATCGACGATAATAGCGTCAACCGGGTAAATATTAGGGGGGGCTTATAGTATATGG  
TTTTATAATAGAATAAGCTTTGGGGAACCCTCAATATATTATAGGGAGCTAGATATAAAC  
CGAAGGGAGTTTGAAGAACTATTACCTCTATTAATATTGATAATAATCATAGGTGTGTTT  
CCGAATCTGATATTAGACACTTTACATACAGCGGTGAGTAATATATTTTGGGCCGCCGGG

**TAG**

>nad4-consensus

**ATG**TTAAGTATAATAGCAATAATACCCTTGATAGGTTTATGAATAATAATGATGAGCAGA  
GATGAAAAACAGTATAAAATTATTGGATTAGTAACATCATTACTAACTTAGTAATATAT  
CCAATAATATGGGCGCAACACAATTCAAATAATAATTACTTTCAGATTATAGAGAAAACG  
TCTTCACCCCTTGACACTTATTATCCAGAAATAATCGGGGTAGATAGTATATCATTATAT  
ATGATAGGGATAACAATAATATTAATACCAATATGTATATTATCAACGTGATCGAGTGTG  
AAAAAGGAAGTAAAGTTATATATAGGATTATGATTAGTATTAGAAACCGTCTTAATATTA  
GTATTTCTATGAATAGACATACTATTATTTTATATAACCTTTGAAACAAGTTTAATACCA  
ATGTATTTAATAATAGGGATATATGGGGGTAAAAAAGGAAGATATATGCAGCATACCAA  
TTTTTCTTAATAACATTATTAGGCTCATTATTGATGTTAATGGGGATAATAATGTTATAT  
TCACAAATAGGGGTAAACAGATTATCAAATATACACATTAACAGTGGAGCTAACAAAAGAA  
AGAGAAAAAATAATATGGTTAGCTTTATTTATATCATTTGCGGTGAAAACACCATTAGTA  
CCGGTTCATATTTGGTTACCTGAAGCTCATAGTGAAGCAAATATAGCCGGTTCAATAATA  
TTAGCCGGGTGATTATTAATAATTAGCCGGCTATGGCTTTCTGAGATATTCACTGAATATA  
TTACCTGAGGCATCAAGATATTATATTCCCTTAGTATATGGTTTATCTATAATAAGTATC  
ATTTATTGTAGTTTAACCACTTAAGACAAATAGATATGAAAAAATCATAGCATATTCA  
TCCATAGGTCATATGGGGATAGTAATATTAGGTATATTTTCCAATACGATGGAGGGGCTA  
GAGGGTTCGATGATATTAATGATAGGTCATGGATTGGTATCACCGGGGTATTTATAATA  
GTAACGATATTATATGAAAGATATCATAGTCGAATAATAAAATATTATAGGGGGTGACG  
TCGACAAGTCCATTAATAGCGATATTATTTATAATATATACCTTAGCCAATATGGGTGTA  
CCTTTATCGAGTAATTTTATAGGGGAAATATTATGTTTAATGGGTGCTTGGGAAACCAAT  
CCGATATCGACGATAATAGCGTCAACCGGGTAAATATTAGGGGGGGCTTATAGTATATGG  
TTTTATAATAGAATAAGCTTTGGGGAACCCTCAATATATTATAGGGAGCTAGATATAAAC  
CGAAGGGAGTTTGAAGAACTATTACCTCTATTAATATTGATAATAATCATAGGTGTGTTT  
CCGAATCTGATATTAGACACTTTACATACAGCGGTGAGTAATATATTTTGGGCCGCCGGG

**TAG**

>nad5-KVL-14-117

**ATG**TATCTGGGAATTATCACCTCCCGCTAATAACCGGTTTAATATGTGGTTTATTTGGG  
AGAAATCTAGGTAACCAGGGAACAAACTATTAGGGACTCATTCGATAGTAATAGGGACA  
TTAATAAGCATAACTCTATATTATGAGATAGCGATTTTCAAGATCACCATTAAGTATATAT  
TTACTAGATTGGGTAGATACAGAGTATCTGGGTTTAAGCTGGGGATTTAACTAGATAGT  
TTAAGTATAAGTATATATATACCGGTATTAATAGTATCAAGTTGTGTGCATATATATTCCG



AGGATATATATGAGTGAGGATGGGCATAATGCAAGATTTTATAGTTATTTATCTTTGTTT  
ACATTTTTTCATGATAGTGTTAATAAGTGGTGATAATCTACTTTTAATTTTCATAGGTTGG  
GAAGGTGTTGGAGTATGTTTCATATATATTAGTAAATTTTTGGTATAAAAGGATACAAGCT  
AATAAAGCGGCAATGAAAGCATTAAATAGTGAACCGGGTAGGGGATTGGAGTTTAACTTTA  
GGGATGATATTAATCTGGTGGATCTTTGGGGATCTAGAGATATCGACAATATTAAGTCTA  
TCCCGGTTTATAGATGTAGAGTGAATTACGATAGTAACCATATTAGTATTAATTGGGGCG  
ATGGCGAAATCAGCACAGTTAGGCCTTCACACCTGATTGCCGGATGCAATGGAAGGCCCG  
ACTCCAGTTTCAGCATTAAATTCATGCTGCAACAATGGTAACGGCAGGAGTATATTTATTA  
ATAAGATTATCGCCATTAATAGAGTATAGTAGCACAGGGTTACTAATAATAAGTTGGGTG  
GGTGGTTTAACTGCAATATTTGCGGCAAGCATAGCCACTTTCCAAAATGATCTAAAAAGA  
GTAATAGCTTATTCAACCTGTAGCCAGCTTGGATATATGGTGTTAGCAGTGGGTATGAGT  
CAATATACATTAAGTGCCTATCATTTAGTAAATCATGCTTATTTCAAAGCATTATTATTT  
TTGTCCGCCGGAGCAGTAATTCATAGTCTTTCAGATGAACAGGACATGAGGAGGCATGGA  
GGGTTAATAAATATATTACCTTTACCTATATATGTATATTAATAGGTTCTGTTAAGTTTA  
TTAGCCACGCCTTACTTAACAGGGTTTTATTCAAAGATTTAATCTTAGAAGTAGCCTAT  
GGGCAATATAATAGTCAAGGAAGTATAGGATATTGGTTAGGGACAATAACGGCGTGTATA  
ACCTCTTTTTATTCTGTTTAGATTAATATATTTAACTTTTATATCAAAAATAATGGGGTG  
AGATCAAATTATTTAAACGGACATGAACCTTCAATAATAATGACAACGCCTTTAGTCATA  
TTAAGTTTATTCTCCATCGTCCATGGTTATTTAGCTAGTGATGCATATATAGGATTAGGT  
AGTGGATTATGGGGTGATGGAAGTATATTAATTACACCAGATAATCTAACCACCATAGAA  
GGTGAATTTGGTTTACCTTTACAGAATAAGTTATTGCCTTTATTTGGGAGTTTAAATGTTT  
ATAATATTAGGTATAGGACTAATATATACCGAAGGGGGACGAGTGAGCTCGGTGAGAGGG  
ATAAAAATATATAGATTTTTCAATGAAAGATATCATATCGATAATATATATAATAGTTTA  
ATAGTCTCTAATATCTTAAAATTAGCCAGAATAACAAGTAAAAGATTAGATAAAGGAATC  
TTGGAATTAATCGGTGTTACCGCCATTATAAGAGTAGTTAATAATATATCTTCTAAATTA  
GCTTCCTTTGATAATGGTTATATACCTCATTTAGCTTTAAATATAATAATTGGTTTAATT  
TTAGCATTATCACTCGCCGAGGGGCTTTACCTGGAAAGAATTTAATCTTAATCTTAATA  
TTAACTCTGTGAATAATTCATCATTAACCGTCAT

**TAA**

>nad5-KVL-14-118

**ATG**TATCTGGGAATTATCACCTCCCGCTAATAACCGGTTTAATATGTGGTTTATTTGGG  
AGAAATCTAGGTAACCAGGGAACAAAATAATTAGGGACTCATTCGATAGTAATAGGGACA  
TTAATAAGCATAACTCTATATTATGAGATAGCGATTTTCAATCACCATTAAAGTATATAT  
TTACTAGATTGGGTAGATACAGAGTATCTGGGTTTAAAGCTGGGATTTAACTAGATAGT  
TTAAGTATAAGTATATATATACCGGTATTAATAGTATCAAGTTGTGTGCATATATATTCC  
AGGATATATATGAGTGAGGATGGGCATAATGCAAGATTTTATAGTTATTTATCTTTGTTT  
ACATTTTTTCATGATAGTGTTAATAAGTGGTGATAATCTACTTTTAATTTTCATAGGTTGG  
GAAGGTGTTGGAGTATGTTTCATATATATTAGTAAATTTTTGGTATAAAAGGATACAAGCT  
AATAAAGCGGCAATGAAAGCATTAAATAGTGAACCGGGTAGGGGATTGGAGTTTAACTTTA  
GGGATGATATTAATCTGGTGGATCTTTGGGGATCTAGAGATATCGACAATATTAAGTCTA  
TCCCGGTTTATAGATGTAGAGTGAATTACGATAGTAACCATATTAGTATTAATTGGGGCG  
ATGGCGAAATCAGCACAGTTAGGCCTTCACACCTGATTGCCGGATGCAATGGAAGGCCCG  
ACTCCAGTTTCAGCATTAAATTCATGCTGCAACAATGGTAACGGCAGGAGTATATTTATTA  
ATAAGATTATCGCCATTAATAGAGTATAGTAGCACAGGGTTACTAATAATAAGTTGGGTG  
GGTGGTTTAACTGCAATATTTGCGGCAAGCATAGCCACTTTCCAAAATGATCTAAAAAGA

GTAATAGCTTATTCAACCTGTAGCCAGCTTGGATATATGGTGTAGCAGTGGGTATGAGT  
CAATATACATTAAGTGCCTATCATTTAGTAAATCATGCTTATTTCAAAGCATTATTATTT  
TTGTCCGCCGGAGCAGTAATTCATAGTCTTTCAGATGAACAGGACATGAGGAGGCATGGA  
GGGTTAATAAATATATTACCTTTACCTATATATGTATATTAATAGGTTTCGTTAAGTTTA  
TTAGCCACGCCTTACTTAACAGGGTTTTATTCAAAGATTTAATCTTAGAAGTAGCCTAT  
GGGCAATATAATAGTCAAGGAAGTATAGGATATTGGTTAGGGACAATAACGGCGTGTATA  
ACCTCTTTTTATTTCGTTTAGATTAATATATTTAACTTTTATATCAAAAATAATGGGGTG  
AGATCAAATTATTTAAACGGACATGAACCTTCAATAAATGACAACGCCTTTAGTCATA  
TTAAGTTTATTCTCCATCGTCCATGGTTATTTAGCTAGTGATGCATATATAGGATTAGGT  
AGTGGATTATGGGGTGATGGAAGTATATTAATTACACCAGATAATCTAACCACCATAGAA  
GGTGAATTTGGTTTACCTTTACAGAATAAGTTATTGCCTTTATTTGGGAGTTTAATGTTT  
ATAATATTAGGTATAGGACTAATATATACCGAAGGGGGACGAGTGAGCTCGGTGAGAGGG  
ATAAAAATATATAGATTTTTCAATGAAAGATATCATATCGATAATATATATAATAGTTTA  
ATAGTCTCTAATATCTTAAAATTAGCCAGAATAACAAGTAAAAGATTAGATAAAGGAATC  
TTGGAATTAATCGGTGTTACCGCCATTATAAGAGTAGTTAATAATATATCTTCTAAATTA  
GCTTCCTTTGATAATGGTTATATACCTCATTTAGCTTTAAATATAATAATTGGTTTAATT  
TTAGCATTATCACTCGCCGAGGGGCTTACCCTGGAAGAATTTAATCTTAATCTTAATA  
TTAACTCTGTGAATAATTCATCATTAACCGTCATTAA

>nad5-HHdFL130914-1

ATGTATCTGGGAATTATCACCTCCCGCTAATAACCGGTTTAATATGTGGTTTATTTGGG  
AGAAATCTAGGTAACCAGGGAACAAAATACTATTAGGGACTCATTTCGATAGTAATAGGGACA  
TTAATAAGCATAACTCTATATTATGAGATAGCGATTTTCAGAATCACCATTAAAGTATATAT  
TTACTAGATTGGGTAGATACAGAGTATCTGGGTTTAAGCTGGGGATTTAACTAGATAGT  
TTAAGTATAAGTATATATATACCGGTATTAATAGTATCAAGTTGTGTGCATATATATTTCG  
AGGATATATATGAGTGAGGATGGNNNNNNNNNNNNNNNNNNNNNNNNNNNNNNNNNNNNNN  
NNNNNNNNNNNNNNNNNNNNNNNNNNNNNNNNNNNNNNNNNNNNNNNNNNNNNNNNNNNN  
NNNNNTGTTGGAGTATGTTTCATATATATTAGTAAATTTTTGGTATAAAAGGATACAAGCT  
AATAAAGCGGCAATGAAAGCATTAAAGTGAACCGGGTAGGGGATTGGAGTTTAACCTTA  
GGGATGATATTAATCTGGTGGATCTTTGGGGATCTAGAGATATCGACAATATTAAGTCTA  
TCCCGGTTTATAGATGTAGAGTGAATTACGATAGTAACCATATTAGTATTAATTGGGGCG  
ATGGCGAAATCAGCACAGTTAGGCCTTCACACCTGATTGCCGGATGCAATGGAAGGCCCG  
ACTCCAGTTTCAGCATTAAATTCATGCTGCAACAATGGTAACGGCAGGAGTATATTTATTA  
ATAAGATTATCGCCATTAATAGAGTATAGTAGCACAGGGTTACTAATAATAAGTTGGGTG  
GGTGGTTTAACTGCAATATTTGCGGCAAGCATAGCCACTTTCCAAAATGATCTAAAAAGA  
GTAATAGCTTATTCAACCTGTAGCCAGCTTGGATATATGGTGTAGCAGTGGGTATGAGT  
CAATATACATTAAGTGCCTATCATTTAGTAAATCATGCTTATTTCAAAGCATTATTATTT  
TTGTCCGCCGGAGCAGTAATTCATAGTCTTTCAGATGAACAGGACATGAGGAGGCATGGA  
GGGTTAATAAATATATTACCTTTACCTATATATGTATATTAATAGGTTTCGTTAAGTTTA  
TTAGCCACGCCTTACTTAACAGNNNNNNNNNNNNNNNNNNNNNNNNNNNNNNNNNNNNNN  
NNNNNNNNNNNNNNNNNNNNNNNNNNNNNNNNNNNNNNNNNNNNNNNNNNNNNNNNNNNN  
ACCTCTTTTTATTTCGTTTAGATTAATATATTTAACTTTTATATCAAAAATAATGGGGTG  
AGATCAAATTATTTAAACGGACATGAACCTTCAATAAATGACAACGCCTTTAGTCATA  
TTAAGTTTATTCTCCATCGTCCATGGTTATTTAGCTAGTGATGCATATATAGGATTAGGT  
AGTGGATTATGGGGTGATGGAAGTATATTAATTACACCAGATAATCTAACCACCATAGAA

GGTGAATTTGGTTTACCTTTACAGAATAAGTTATTGCCTTTATTTGGGAGTTTAATGTTT  
ATAATATTAGGTATAGGACTAATATATACCGAAGGGGGACGAGTGAGCTCGGTGAGAGGG  
ATAAAAATATATAGATTTTTCAATGAAAGATATCATATCGATAATATATATAATAGTTTA  
ATAGTCTCTAATATCTTAAAATTAGCCAGAATAACAAGTAAAAGATTAGATAAAGGAATC  
TTGGAATTAATCGGTGTTACCGCCATTATAAGAGTAGTTAATAATATATCTTCTAAATTA  
GCTTCCTTTGATAATGGTTATATACCTCATTTAGCTTTAAATATAATAATTGGTTTAATT  
TTAGCATTATCACTCGCCGAGGGGCTTTACCCTGGAAAGAATTTAATCTTAATCTTAATA  
TTAACTCTGTCTGAATAATTCATCATTAACCGTCAT**TAA**

>nad5-Berkeley

**ATG**TATCTGGGAATTATCACCTCCCGCTAATAACCGGTTTAATATGTGGTTTATTTGGG  
AGAAATCTAGGTAACCAGGGAACAAAACCTATTAGGGACTCATTCGATAGTAATAGGGACA  
TTAATAAGCATAACTCTATATTATGAGATAGCGATTTTCAAGATCACCATTAAAGTATATAT  
TTACTAGATTGGGTAGATACAGAGTATCTGGGTTTAAGCTGGGGATTTAACTAGATAGT  
TTAAGTATAAGTATATATATACCGGTATTAATAGTATCAAGTTGTGTGCATATATATTCCG  
AGGATATATATGAGTGAGGATGGGCATAATGCAAGATTTTATAGTTATTTATCTTTGTTT  
ACATTTTTTTCATGATAGTGTTAATAAGTGGTGATAATCTACTTTTAATTTTCATAGGTTGG  
GAAGGTGTTGGAGTATGTTTCATATATATTAGTAAATTTTTGGTATAAAAGGATACAAGCT  
AATAAAGCGGCAATGAAAGCATTAAATAGTGAACCGGGTAGGGGATTGGAGTTTAACTTTA  
GGGATGATATTAATCTGGTGGATCTTTGGGGATCTAGAGATATCGACAATATTAAGTCTA  
TCCCGGTTTATAGATGTAGAGTGAATTACGATAGTAACCATATTAGTATTAATTGGGGCG  
ATGGCGAAATCAGCACAGTTAGGCCTTCACACCTGATTGCCGGATGCAATGGAAGGCCCC  
ACTCCAGTTTTCAGCATTAAATTCATGCTGCAACAATGGTAACGGCAGGAGTATATTTATTA  
ATAAGATTATCGCCATTAAATAGAGTATAGTAGCACAGGGTTACTAATAATAAGTTGGGTG  
GGTGGTTTAACTGCAATATTTGCGGCAAGCATAGCCACTTTCCAAAATGATCTAAAAAGA  
GTAATAGCTTATTCAACCTGTAGCCAGCTTGGATATATGGTGTTAGCAGTGGGTATGAGT  
CAATATACATTAAAGTGCCTATCATTTAGTAAATCATGCTTATTTCAAAGCATTATTATTT  
TTGTCCGCCGGAGCAGTAATTCATAGTCTTTCAGATGAACAGGACATGAGGAGGCATGGA  
GGGTTAATAAATATATTACCTTTACCTATATATGTATATTAATAGGTTCTGTTAAGTTTA  
TTAGCCACGCCTTACTTAACAGGGTTTTATTCAAAGATTTAATCTTAGAAGTAGCCTAT  
GGGCAATATAATAGTCAAGGAAGTATAGGATATTGGTTAGGGACAATAACGGCGTGTATA  
ACCTCTTTTTTATTCGTTTAGATTAATATATTTAACTTTTATATCAAAAACCTAATGGGGTG  
AGATCAAATTATTTAAACGGACATGAACCTTCAATAATAATGACAACGCCTTTAGTCATA  
TTAAGTTTATTCTCCATCGTCCATGGTTATTTAGCTAGTGATGCATATATAGGATTAGGT  
AGTGGATTATGGGGTGATGGAAGTATATTAATTACACCAGATAATCTAACCACCATAGAA  
GGTGAATTTGGTTTACCTTTACAGAATAAGTTATTGCCTTTATTTGGGAGTTTAATGTTT  
ATAATATTAGGTATAGGACTAATATATACCGAAGGGGGACGAGTGAGCTCGGTGAGAGGG  
ATAAAAATATATAGATTTTTCAATGAAAGATATCATATCGATAATATATATAATAGTTTA  
ATAGTCTCTAATATCTTAAAATTAGCCAGAATAACAAGTAAAAGATTAGATAAAGGAATC  
TTGGAATTAATCGGTGTTACCGCCATTATAAGAGTAGTTAATAATATATCTTCTAAATTA  
GCTTCCTTTGATAATGGTTATATACCTCATTTAGCTTTAAATATAATAATTGGTTTAATT  
TTAGCATTATCACTCGCCGAGGGGCTTTACCCTGGAAAGAATTTAATCTTAATCTTAATA  
TTAACTCTGTCTGAATAATTCATCATTAACCGTCAT**TAA**

>nad5-HHdFL050913-1

**ATG**TATCTGGGAATTATCACCTCCCGCTAATAACCGGTTTAATATGTGGTTTATTTGGG

AGAAATCTAGGTAACCAGGGAACAAACTATTAGGGACTCATTGATAGTAATAGGGACA  
TTAATAAGCATAACTCTATATTATGAGATAGCGATTTT CAGAATCACCATTAAGTATATAT  
T TACTAGATTGGGTAGATACAGAGTATCTGGGTTTAAGCTGGGGATTTAAACTAGATAGT  
TTAAGTATAAGTATATATATACCGGTATTAATAGTATCAAGTTGTGTGCATATATATTG  
AGGATATATATGAGTGAGGATGGGCATAATGCAAGATTTTATAGTTATTTATCTTTGTTT  
ACATTTTTTCATGATAGTGTTAATAAGTGGTGATAATCTACTTTTAATTTTCATAGTTGG  
GAAGGTGTTGGAGTATGTTTCATATATATTAGTAAATTTTTGGTATAAAAGGATACAAGCT  
AATAAAGCGGCAATGAAAGCATTAAATAGTGAACCGGGTAGGGGATTGGAGTTTAACTTTA  
GGGATGATATTAATCTGGTGGATCTTTGGGGATCTAGAGATATCGACAATATTAAGTCTA  
TCCCGGTTTATAGATGTAGAGTGAATAACGATAGTAACCATATTAGTATTAATTGGGGCG  
ATGGCGAAATCAGCACAGTTAGGCCTTCACACCTGATTGCCGGATGCAATGGAAGGCCCG  
ACTCCAGTTTCAGCATTAAATTCATGCTGCAACAATGGTAACGGCAGGAGTATATTTATTA  
ATAAGATTATCGCCATTAATAGAGTATAGTAGCANNNNNNNNNNNNNNNNNNNNNNNNNNNN  
NNNNNNNNNNNNNNNNNNNNNNNNNNNNNNNNNNNNNNNNNNNNNNNNNNNNNNNNNNNN  
GTAATAGCTTATTCAACCTGTAGCCAGCTTGGATATATGGTGTAGCAGTGGGTATGAGT  
CAATATACATTAAGTGCCTATCATTTAGTAAATCATGCTTATTTCAAAGCATTATTATTT  
TTGTCCGCCGGAGCAGTAATTCATAGTCTTTCAGATGAACAGGACATGAGGAGGCATGGA  
GGGTTAATAAATATATTACCTTTACCTATATATGTATATTAATAGGTTGTTAAGTTTA  
TTAGCCACGCCTTACTTAACAGGGTTTTATTCAAAGATTTAATCTTAGAAGTAGCCTAT  
GGGCAATATAATAGTCAAGGAAGTATAGGATATTGGTTAGGGACAATAACGGCGTGTATA  
ACCTCTTTTTATTGTTTAGATTAATATATTTAACTTTTATATCAAAAATAATGGGGTG  
AGATCAAATTATTTAAACGGACATGAACCTTCAATAATAATGACAACGCCTTTAGTCATA  
TTAAGTTTATTCTCCATCGTCCATGGTTATTTAGCTAGTGATGCATATATAGGATTAGGT  
AGTGGATTATGGGGTGATGGAAGTATATTAATTACACCAGATAATCTAACCACCATAGAA  
GGTGAATTTGGTTTACCTTTACAGAATAAGTTATTGCCTTTATTTGGGAGTTTAATGTTT  
ATAATATTAGGTATAGGACTAATATATACCGAAGGGGGACGAGTGAGCTCGGTGAGAGGG  
ATAAAAATATATAGATTTTTCAATGAAAGATATCATATCGATAATATATATAATAGTTTA  
ATAGTCTCTAATATCTTAAATTAGCCAGAATAACAAGTAAAAGATTAGATAAAGGAATC  
TTGGAATTAATCGGTGTTACCGCCATTATAAGAGTAGTTAATAATATATCTTCTAAATTA  
GCTTCCTTTGATAATGGTTATATACCTCATTTAGCTTTAAATATAATAATTGGTTTAATT  
TTAGCATTATCACTCGCCGAGGGGCTTTACCCTGGAAAGAATTTAATCTTAATCTTAATA  
TTAACTCTGTGAATAATTCATCATTAAACCGTCATTAA

>nad5-consensus

ATGTATCTGGGAATTATCACCTCCCGCTAATAACCGGTTTAATATGTGGTTTATTTGGG  
AGAAATCTAGGTAACCAGGGAACAAACTATTAGGGACTCATTGATAGTAATAGGGACA  
TTAATAAGCATAACTCTATATTATGAGATAGCGATTTT CAGAATCACCATTAAGTATATAT  
T TACTAGATTGGGTAGATACAGAGTATCTGGGTTTAAGCTGGGGATTTAAACTAGATAGT  
TTAAGTATAAGTATATATATACCGGTATTAATAGTATCAAGTTGTGTGCATATATATTG  
AGGATATATATGAGTGAGGATGGGCATAATGCAAGATTTTATAGTTATTTATCTTTGTTT  
ACATTTTTTCATGATAGTGTTAATAAGTGGTGATAATCTACTTTTAATTTTCATAGTTGG  
GAAGGTGTTGGAGTATGTTTCATATATATTAGTAAATTTTTGGTATAAAAGGATACAAGCT  
AATAAAGCGGCAATGAAAGCATTAAATAGTGAACCGGGTAGGGGATTGGAGTTTAACTTTA  
GGGATGATATTAATCTGGTGGATCTTTGGGGATCTAGAGATATCGACAATATTAAGTCTA  
TCCCGGTTTATAGATGTAGAGTGAATTACGATAGTAACCATATTAGTATTAATTGGGGCG



```
>nad6-Berkeley
```

>nad6-HHdFL050913-1

>nad6-consensus

```
>atp6-consensus
```

**ATG**TTATTGTTTAGAAATCCTTTAGAACAAATTTATGATTAAACGAGTTATTAACGATATTA  
TTCCCTTTCTGGGAAGTGTCAATTAACAAATATAGGTTTATATTTAATAATGAGTTTAGTA

CTAATAGTAATAATATCACAAATCATCCTCGGCTCGACGGGGGGTGTGCCGATAATAGGG  
AATAAAAGTATATTAATAAAACAATCAATATATGATACAGTGCATAAGATAGTAAAAGAT  
CAGATAGGTATATCACATGAAATAAATTTACCTTTTTTATACACATTATTTATATTAGTA  
TTGACATTAAATTTAATTGGAATTATTCCTTATAATTATAGTACAACCTCGCATCTCGTT  
TTAACATTAAGTATGAGTGTATCAATATTAATAGGAGTGACAGTAATGGGAGTAAACCGA  
CATAAATTAGTATTTTTTAGTCTACTAATCCCTGGGGTACTCCGTTAGGTCTGGTACCT  
CTATTAGTAATAATAGAAACAATATCTTATCTGGCTAGAGCTATTAGCTTAGGAGTAAGA  
TTGGGTGCAAATATGATAGCAGGTCATGTTTTATTAATAAATCTTAGCAGGATTAATCTTG  
AAAATAATGAAACTTCGTTAATAACCGGCTTAATAATAGGATGCCTGCCTATGTTTATC  
TTTACTTTATTAGTAGGATTAGAATTAGGTATAAGTGTATTACAAGGGATAGTATTTCTC  
ATTTTAACTTCATCTTATATAAAAGATGCTATTGCTTTACAT**TAG**

>atp9-consensus

**ATG**TTAGAGTCTGCCAAAATTATAGGATCAGGAATAGCAACGATAGGTTTAGCCGGTGCG  
GGTGTGGGTATAGGTTTAGTGTTTGCCGCTCTAATAAATTCAACATCTAGAAATCCTTCA  
TTAAAAGGACAATTATTCAGTTATTGTATTTTAGGTTTTGCTTTAACTGAAGCTATAGGC  
CTTTTTGCAATAATGATGTCATTCTTATTATTATATGCCGCT**TAA**

>cob-consensus

**ATG**GCAAATAGTTATATAATTGATTCCCCCTCCCCAGTAATTTAACGTATTTATGGGGT  
TATGGGTCAATTATTAGGCCTAGTATTAGTTATGCAAATAATAACCGGTGTAACCTCTAGCT  
ATGCATTATACTCCTAACATTGAGATGGCATTTAATTCAGTTGAACATATCATGAGAGAC  
GTAAATAACGGCTG**ATTA**ATTTCGTTACACTCACGCAAATGTAGCGTCATTTTTTTTTATA  
TTTTTATATATCCATATAGGAAGAGGTTTATATTATGGTTCCTTATACCAGACCAAGGATA  
TTATTATGGTCTATAGGAGTAATAATATTTGTATTAACAATGGCAACAGGGTTTTTGGGT  
TATACTCTTCCCTGAGGTCAAATGAGCCTATGAGGTGCAACGGTTATAACTAATTTATTA  
TCGGCAATACCTTGGATGGGAGTTAATATAGTGGAAATTTGTCTGGGGTGGATTTTCCGTG  
GATAATGCGACATTAAACAGATTTTTTCAGTCTTCATTATTTATTACCCTTTATATTAGTG  
GGATTAGTGGTATTACATTTAGTAGCTCTTCATCACCATGGAAGTAATAACCCATTAGGG  
GTATCAGCCAATGGTGATAGAGTACCATTCCATCCTTATTATACTTTTAAAGATATAGTA  
GGATTTTTAGCCTTCTTTTTAGTATTATCAATAATTGTCTTCTATATGCCTAATTTATTA  
GGTCATTACAGACAACTACATACCAGCCAACCCGCTGGTAACACCAACTCACATACAACCA  
GAATGGTATTTTTTACCTTATTATGCAATATTACGATCAATCCCTAATAAGCTATTAGGG  
GTTATAGCAATGTTTGCTGCGATATTAATATTATTAGCAATGCCTTTCTTAGATGAATCA  
AGAATACGAGGAAGTCAATTTAGACCTTTTTATGAAAATAATCTTTTGGTTATTTATATCA  
AATTTTCGTATTATTAGGATGGATAGGTGCTAAACCAGTATCAGATCCTTACATAATAATA  
GGTCAGTTAAGTTCAATATTTTATTTTGCATGGTTTGCAATAGTAGCCATGGTAGGGATA  
ATAGAAAATACTCTATATCAAATGAGACAACCTTTGGCTGGGGGCCAAA**TAG**

>cox1-consensus

**GTG**TACGCTATAAGGTGGTTATACTCGACCAATGCCCCGAGATATTGGGGTATTATATTTA  
ATTTTTGCCATCTTGGCGGGATTAAATAGGGACAGTATTATCAATCATAATAAGATTAGAA  
TTAGGAGGTGCGGGGGTTCAATATTTACAAGGAGATAACCAATTATACAATGTGGTTGTG  
ACGGCACACGCATTTCGTC**ATG**ATTTTTTTTCATGGTGATGCCGGCGTTAATAGGGGGTTTT  
GGGAATTTTTATAGTTCCAGTGATGATAGGTGCCGCTGATATGGCATTCCCAAGATTAAAT  
AATATATCATTTTTGGTTATTACCTCCATCATTGATATTATTATTATCATCATTAGTT  
GAGAATGGTGCGGGTACTGGTTGGACTGTTTATCCTCCATTATCATCAATCCAAGCTCAC

TCAGGAGGATCGGTTGATTTAGCAATATTCTCGCTTCACCTGGCAGGGATATCTTCTATG  
TTAGGTGCAATAAATTTCTTAACAACAATAATTAATATGCGAGCCCCGGGTATGAGCTGG  
CATAAATTGCCGTTATTTGTGTGGGCAGTATTTATAACTGCAATATTATTATTATCA  
TTACCAGTGTTAGCGGGTGAATAACTATGCTTCTTACAGATAGAACTTTAATAGTTCT  
TTCTATGACCCATCAGCTGGGGTGATCCAGTGCTTTATCAGCATATTTTCTGATTCTTT  
GGTCATCCTGAAGTGATATATTAATTATACCAGGATTTGGTATAATAAGTCATGTAATA  
TCAACTTATTCCGGTAAAAGAGTATTCCGTTATCTAGGTATGATATACGCATTAGCTTCA  
ATAGGAATCTTAGGATTCATAGTATGGTCTCATCACATGTTCACTGTAGGTCTAGATGTC  
GATACAAGAGCATATTTCACTTCAGCGACATTAATAATTGCAGTGCCAACAGGGATAAAA  
ATATTCTCGTGGCTGGCGACGATATACGGGGGAAGTATAAGATTTAGTACTCCTATGTTA  
TTTTCTATGGGATTCATATTTTTATTTACAGTAGGAGGATTAAGTGGAGTAATATTAGCC  
AATGCCTCGTTAGATATAGCTTTACATGATACTTACTACGTGGTAGCACATTTCCATTAT  
GTATTATCAATGGGAGCAGTATTTGCATTATTTGCAGCATTCTATTATTGAATAGGTAAA  
ATTACTGGAAAACAATATAATGAATTATTAGGGCAGATACATTTTTATACGATGTTTGTC  
GGGGTAAATATAACATTCTTCCCAATGCATTTCTTAGGTCTGGCGGGTATGCCACGTAGA  
ATACCAGACTATCCAGATGCTTTATAGGATGGAATTATATAGCATCCTTAGGATCAATA  
ATAAGTTTAGTATCAACAGTATTATTCTTATACATAGTCTATGATTTATTAATAATGAG  
GTGGAAGCAAGCGACGGAGCCGATGTAGAAAACGAGTACTTTATATCGAGATGGTCAACT  
AAATATGCTCAGACCTTAGAGTGGAGTTTAACAAGCCCACCTGGCTTCCATTGTTATAAT  
AGTTTACCAACCTTCCTAACGAAGTAA

>cox2-consensus

ATGTGATTAAATTATATAATGAACGATGCACCAGAGGGGTGACAATTAGGTTTTCAAGAT  
AGTGCAAGTCCTATAGCAGAAGGGATATTAAGAATACATAATGAAATACAATATTATTTA  
TTAATAATTCTAGTATTAATATGTTGGATAATAACTTCAATAATTTTCAAATTCATGAA  
GAAAGTAATAAATTTAAATCTAAATATATGAATCATGGTACATTAATAGAATTAATTTGA  
ACAATAACACCTGCGTTAATCTTAGTCGCCATAGCTATACCTTCATTTAAATTATTATAT  
TTAATGGATGAAGTAATAGAACCAACCATTACATTACAAATTACCGGTCACCAATGATAT  
TGGTCTACAGAATACTCTGACTATGTAAAACAATCAGGCAATATTGAGTTTGACAGTTAT  
ATGATCGCAACCTCGGATTTAGAATTAGGTAAATTAAGATTATTGGAAGTAGATAATAGA  
GTAATATTACCAGTAGACACACATGTCAGAGTAATAGTTACGAGTACCGATGTAATACAC  
TCACTAGCATTACCATCCTTAGGGGTAAAATTGACTGTTGCCAGGTGATTAAACCAA  
ACATCTTTCATAATAAAAAGAGAAGGTGATTCTACGGACAATGCTCAGAACTTTGCGGA  
CATGCACACGGTTTCATGCCGATAGTAATAGAGGGGGTAACATTAGAGGATTACTTAGTA  
TGGGTAAATGAGTCGGTAGAAGATAG

>cox3-consensus

ATGAAGTATAACAAACAATCACATCCTTTTTCATTTAGTAGAACCGTCACCTTGACCTTTA  
ACCACTTCGATAGGCTTAGGTATAATGGCGATGGGGGGAGTAATATATTTTACGGGTTTA  
GATAGTATTGTATTAATATTAGGTTTGGTTGTGACGATAATGACAAGTACATTATGGTGG  
AGAGATTGCATTAGAGAGGGTACATTACAAGGTTATCATACAAAAAAGTAAGAAAAGGT  
ATCAATATAGGATTTATATTATTTATAGTCTCTGAAGTATTCTTCTTTTTTTCTATTTTC  
TGGGCCTATTTCCACTCTAGTTTATACCCGTCGGTAGAATTAGGTGGTATGTGGCCGCCA  
ATGGGGATAGAAGCATTAAACCTTTGAGAGCTACCTTTATTAATAACAGTAATATTGTTA  
TCCTCAGGCGCCACAGTGACAACCTGCTCATCATGGATTAATCTATGGGGCGAGACGAATA  
GTAATATTAAGTTTAATAACAACCTTTAATCTTAGCAGTTTTATTTGTAGGGTGCCAAGGA



TATGAATACTATAATGCACCCTTCAGTTTTTCTGATGGAGCGTATGGATCAACTTTCTTC  
TTTGCAACAGGTTTCCATGGGTTGCACGTAATAATCGGTACGATATTTTTAGCAGTAGCC  
TTTAATAGGTTATGAATTATGAATTAATAATCAGCACCACGTTGGTTTTGAATCCGCA  
ATCCTGTATTGACATTTCTAGACATCGTTTGACTGTTTTTATTTATAGTAATCTACGGT  
TGAGGGGCGTAA

>nad1-consensus

ATGATCGAGATACTCTCATTAAATAATTCCTTTATTAGTTTCAATAGCTTATTTAACTTTA  
GCGGAAAGAAAACATCGGGTTCAATGCAAAGACGATTAGGTCCAAATAAGGTAGGGATA  
CTAGGTCTATTACAGCCATTTGCCGATGGTTTAAAATTAGTGATAAAAGAAACGATTATC  
GTATCACAAGCTAATAAAATAATCTTTTTCTTGGCTCCCTATATAACATTGGTATTTGGT  
TTCTTGGCTTGAGGTGTCATTCCATTTACTAGAGGGATAATAATAGAGGATATAGGTTAT  
AGTACATTATATATATTATTGATAACGGGGATAGGGGTATTAGGGATAATATTAGCAGGT  
TGGTCAGCTAATTCTAAATATGCAGTATTAGGGTCGTTAAGGACCACCGCCCAGTTAATA  
TCTTACGAGGTAGTAATAGGCTTAATGGTAATAATGGTGGTGATGCTAAGTGATGGGTG  
AGTTTAATATCAATCATAGAAGCACAAAACATATCTGGAATATAATACCAGTATGGCCT  
ATATATATCATATTCATGATATCAGCGATAGCAGAAACAAATCGAGCCCCGATGGACTTA  
CCTGAAGCTGAATCAGAGTTAGTGGCAGTTTTCAAACCGAGCACTCAGCCTTATCTTTT  
GCTTATTTCTTTTTAGGTGAGTATGGGAATATAATATTAATTTGTACCATCACGGCCAAT  
TTCTTTTGGGGGGTTATAGTATAGGCGGAATTAATTCGGCTTTAATATTAGGCTTAAAA  
GTATCGATGCTTTTATTTGTCTTCATCCTCTGCAGGGCTACTTATCCTAGGCTCAGATTT  
GACCAATTAATGAGTTTAATGTGAACAGGATTATTGCCACTAGTACTAGGGTATTTTGTA  
TTAATCTCTAGTATAATGGTTATTATTACCAACTGGTAG

>nad2-consensus

ATGTTAACTTTAAGTATAATAATATTAATAACAAGTTTAGGGAGATGAATAAATATAAAT  
AGAATGACGATGATAGTATTTATATATTCAGGAATTTTAAGTATAAATATGACGGGGGAG  
AGCAATAGCGCCATAGGGTGTTCCGATATGGGGATGATAAATTCAGGGATAGGGCTATAT  
AATGGATTATATCAAGTGACACCAATAACTCAATTCATAGAACTTATATAAATATATTA  
GCGGTAGGCTGTATGGCGATGAAGGCTAGGAGTGAATATAGTATATTAGCCTTAATAGTG  
ACGGTAGGGATGAGTAGTTTAATAAGTAGTAATGAGATAGTTAGTATATTAATAGGGATA  
GAGTTACAGACATTAGGATTATATGTCATAGCCAGTCTAGATAGAGGTTTACAGAGACCTCG  
ACGGCAGCGGGGTTAAAATATTATTTATTAGGGGGTTTATCGTCATGTATAATAGGTTTA  
GGTTTGAGTATGATATATGGGATAACAGGGGTGACAAATATAGAGGAGTTAAATATATTA  
ATAAAAATAAATGACGACAGCCGTCATCTAATAATGACGAAGGTATTAATTACAGTAGGA  
TTATTATTTAAAATAGGAGCAGCTCCCTTTTATAATTGGTTAGCGGATGTAATAGATGGA  
GTACCGACTGCGATATCGGCATGGTTAGCGGTGGTATCAAAGATATCAATAATAATAATA  
TTATTAATATTATATAATGCTATATTAATAAAAAATAAACACCAGTGGTGGTGGTCCGATA  
ATAATATTAAGTATAATATTATGCTTTATAGTAGGAAGTTTAGTAGGGATAATACAATCT  
AGGATAAAAACATTATTAGCTTATAGTAGTATAGCCCATGCGGGGTATATATTAATAGGG  
ATAATAGTAAATAATAATCTAGGATTAACAGGTTTAATATTTTATATGGTACAATATTCT  
TTAACGGCATTAAATATATTTATGATAATAATAGCCTATGGTGAGGTAAAAGGGGCATCG  
ATAGTAAAAATATCACAATTAAGAAATCCCTAACACGTGATTAGCGATAAGTTTAGCG  
ATAAGTTTATTTTCATCTGCAGGGATTCCACCGTTTATAGGATTTTATGCCAACTTAAT  
ATATTATACTCGGCTCTAGATACAGGTTTTTACTTCATAACAATAATCGCCATACTAACC  
AGTATAATAAGTGTTATTATTATATAAAAGTAATAAAAGTAATATATTTTGAGGGGGAG

TGATGTAGGGTTGGAACCGCCAATGAAGTACGGGGGGCGATATCAGAAAATTATTCAATA  
ATAATAGCCATGATAAGTTTGTAGTATAATATTATTCATCCTCAGTCCCGAGTGACTATAT  
AATAGTATTCAGATGATATGC **TAG**

>nad3-consensus

**ATG**AATAATTTATTTATCTTAATAATCTCAGCCACCGCCATTGTATTCTTATTATTATTT  
GTCAATCTTATTGTCGGGGATAAAAAACCTTATACTAATAAATTATCTCCCTATGAATGT  
GGTTTAATGCCTTTAGGTGAAGGGAGAGCTAGCTTAAATATACAATATATTTTAGTGGCT  
ATTTTATTTATAATATTTGATATTGAGGTAATAGTATTATTTCCATATGCAGTGACTATA  
AATAATATATACACATACTGGATAATGATTATCTTTATCATCATTTTAACCATAGGGTTT  
TACTTTGAAATTAGTCAAGGGGCTTTAAATATGTGATGAAGAGGTT **TAG**

>nad4-consensus

**ATG**TTAAGTATAATAGCAATAATACCCTTGATAGGTTTATGAATAATAATGATGAGCAGA  
GATGAAAAACAGTATAAAATTATTGGATTAGTAACATCATTACTAACTTAGTAATATAT  
CCAATAATATGGGCGCAACACAATTCAAATAATAATTACTTTCAGATTATAGAGAAAACG  
TCTTCACCCCTTGACACTTATTATCCAGAAATAATCGGGGTAGATAGTATATCATTATAT  
ATGATAGGGATAACAATAATATTAATACCAATATGTATATTATCAACGTGATCGAGTGTG  
AAAAAGGAAGTAAAGTTATATATAGGATTATGATTAGTATTAGAAACCGTCTTAATATTA  
GTATTTCTATGAATAGACATACTATTATTTTATATAACCTTTGAAACAAGTTTAATACCA  
ATGTATTTAATAATAGGGATATATGGGGGTAAAAAAGGAAGATATATGCAGCATACCAA  
TTTTTCTTAATAACATTATTAGGCTCATTATTGATGTTAATGGGGATAATAATGTTATAT  
TCACAAATAGGGGTAAACAGATTATCAAATATACACATTAACAGTGGAGCTAACAAAAGAA  
AGAGAAAAAATAATATGGTTAGCTTTATTTATATCATTTGCGGTGAAAAACACCATTAGTA  
CCGGTTCATATTTGGTTACCTGAAGCTCATAGTGAAGCAAATATAGCCGGTTCATAATA  
TTAGCGGGTGTATTATTAATAATTAGCCGGCTATGGCTTTCTGAGATATTCACTGAATATA  
TTACCTGAGGCATCAAGATATTATATCCCTTAGTATATGGTTTATCTATAATAAGTATC  
ATTTATTGTAGTTTAACCACATTAAGACAAATAGATATGAAAAAATCATAGCATATTCA  
TCCATAGGTCATATGGGGATAGTAATATTAGGTATATTTTCCAATACGATGGAGGGGCTA  
GAGGGGTGATGATATTAATGATAGGTCATGGATTGGTATCACCGGGGTATTTTATAATA  
GTAACGATATTATATGAAAGATATCATAGTCGAATAATAAAATATTATAGGGGGGTGACG  
TCGACAAGTCCATTAATAGCGATATTATTTATAATATATACCTTAGCCAATATGGGTGTA  
CCTTTATCGAGTAATTTTATAGGGGAAATATTATGTTTAATGGGTGCTTGGGAAACCAAT  
CCGATATCGACGATAATAGCGTCAACCGGGTAAATATTAGGGGGGGCTTATAGTATATGG  
TTTTATAATAGAATAAGCTTTGGGGAACCCTCAATATATTATAGGGAGCTAGATATAAAC  
CGAAGGGAGTTTGAAGAACTATTACCTCTATTAATATTGATAATAATCATAGGTGTGTTT  
CCGAATCTGATATTAGACACTTTACATACAGCGGTGAGTAATATATTTTGGGCCGCCGGG

**TAG**

>nad5-consensus

**ATG**TATCTGGGAATTATCACCTCCCGCTAATAACCGGTTTAATATGTGGTTTATTTGGG  
AGAAATCTAGGTAACCAGGGAACAAACTATTAGGGACTCATTGATAGTAATAGGGACA  
TTAATAAGCATAACTCTATATTATGAGATAGCGATTTTCAGAATCACCATTAAGTATATAT  
TTACTAGATTGGGTAGATACAGAGTATCTGGGTTTAAGCTGGGGATTTAACTAGATAGT  
TTAAGTATAAGTATATATATACCGGTATTAATAGTATCAAGTTGTGTGCATATATATTG  
AGGATATATATGAGTGAGGATGGGCATAATGCAAGATTTTATAGTTATTTATCTTTGTTT  
ACATTTTTCATGATAGTGTTAATAAGTGGTGATAATCTACTTTTAATTTTCATAGGTTGG

GAAGGTGTTGGAGTATGTTTCATATATATTAGTAAATTTTTGGTATAAAAGGATACAAGCT  
AATAAAGCGGCAATGAAAGCATTAAATAGTGAACCGGTAGGGGATTGGAGTTTAACTTTA  
GGGATGATATTAATCTGGTGGATCTTTGGGGATCTAGAGATATCGACAATATTAAGTCTA  
TCCCGGTTTATAGATGTAGAGTGAATTACGATAGTAACCATATTAGTATTAATTGGGGCG  
ATGGCGAAATCAGCACAGTTAGGCCTTCACACCTGATTGCCGGATGCAATGGAAGGCCCC  
ACTCCAGTTTTCAGCATTAAATTCATGCTGCAACAATGGTAACGGCAGGAGTATATTTATTA  
ATAAGATTATCGCCATTAATAGAGTATAGTAGCACAGGGTTACTAATAATAAGTTGGGTG  
GGTGGTTTAACTGCAATATTTGCGGCAAGCATAGCCACTTTCAAAATGATCTAAAAAGA  
GTAATAGCTTATTCAACCTGTAGCCAGCTTGGATATATGGTGTAGCAGTGGGTATGAGT  
CAATATACATTAAGTGCCTATCATTTAGTAAATCATGCTTATTTCAAAGCATTATTATTT  
TTGTCCGCCGGAGCAGTAATTCATAGTCTTTCAGATGAACAGGACATGAGGAGGCATGGA  
GGGTTAATAAATATATTACCTTTCACCTATATATGTATATTAATAGGTTCTGTTAAGTTTA  
TTAGCCACGCCTTACTTAACAGGGTTTTATTCAAAGATTTAATCTTAGAAGTAGCCTAT  
GGGCAATATAATAGTCAAGGAAGTATAGGATATTGGTTAGGGACAATAACGGCGTGTATA  
ACCTCTTTTTATTCTGTTTAGATTAATATATTTAACTTTTTATATCAAAAATAATGGGGTG  
AGATCAAATTATTTAAACGGACATGAACCTTCAATAATAATGACAACGCCTTTAGTCATA  
TTAAGTTTATTCTCCATCGTCCATGGTTATTTAGCTAGTGATGCATATATAGGATTAGGT  
AGTGGATTATGGGGTGATGGAAGTATATTAATTACACCAGATAATCTAACCACCATAGAA  
GGTGAATTTGGTTTACCTTTACAGAATAAGTTATTGCCTTTATTTGGGAGTTTAATGTTT  
ATAATATTAGGTATAGGACTAATATATACCGAAGGGGGACGAGTGAGCTCGGTGAGAGGG  
ATAAAAATATATAGATTTTTCAATGAAAGATATCATATCGATAATATATATAATAGTTTA  
ATAGTCTCTAATATCTTAAAATTAGCCAGAATAACAAGTAAAAGATTAGATAAAGGAATC  
TTGGAATTAATCGGTGTTACCGCCATTATAAGAGTAGTTAATAATATATCTTCTAAATTA  
GCTTCCTTTGATAATGGTTATATACCTCATTTAGCTTTAAATATAATAATTGGTTTAATT  
TTAGCATTATCACTCGCCGAGGGGCTTTACCCTGGAAAGAATTTAATCTTAATCTTAATA  
TTAACTCTGTGAATAATTATCATTAACCGTCATTAA

>nad6-consensus

ATGACGAATTTTTTATGATCTTGAGCATCCTCGCCACTTTCCTTACTATCTCTTGCTCT  
AACCCCGTTTACGCAGTTCTAGGTCTTATCTCTTTATTTTGTCTTTCTTCTCTTATTTA  
ATATTGTTAGGTATCGGTTTCCTTGGTTTAACTTATCTACTAATTTATGTCGGGGCCATC  
GCTATTTTATTCTGTTCGTTGTCATGATGATTTATCTCAAATTGTTCCCCCATCAGGTT  
TTCCCTAGTTTATTGCCAGTTGCTACTGCTATTACGGTTTTTTACTTGTATAGCTCCCCA  
GCCCCGGCTTACTTCGCAGATGCTTTTACCTTTTTCTTTTTCTCGCCCCCTCACTCTTTCC  
TCTTGAACCTCGCTATTTAACAACCTCACATCATTTAACTTCTTTTGCTTACCCCTTTTT  
ACTAGTTTCTCACTTTGGTTTCTTTTATCTAGCCTTATTTATTATTAGCTATCATCGCC  
CCTATTCTTTTGATTGTTTCA
